# Supplementary material for: Soil metabolomics and bacterial functional traits revealed the responses of rhizosphere soil bacterial community to long-term continuous cropping of Tibetan barley
Source: PeerJ. 2022 Apr 7;10:e13254. doi: 10.7717/peerj.13254 (PMC8995024; doi:10.7717/peerj.13254)
Supplement: Supplemental Information 17 [file peerj-10-13254-s017.xlsx]

## Sheet: all
Class	Gene_name	CK.1	CK.1	CK.1	CK.2	CK.2	CK.2	CK.3	CK.3	CK.3	CK.4	CK.4	CK.4	CC.2.1	CC.2.1	CC.2.1	CC.2.2	CC.2.2	CC.2.2	CC.2.3	CC.2.3	CC.2.3	CC.2.4	CC.2.4	CC.2.4	CC.5.1	CC.5.1	CC.5.1	CC.5.2	CC.5.2	CC.5.2	CC.5.3	CC.5.3	CC.5.3	CC.5.4	CC.5.4	CC.5.4	CC.10.1	CC.10.1	CC.10.1	CC.10.2	CC.10.2	CC.10.2	CC.10.3	CC.10.3	CC.10.3	CC.10.4	CC.10.4	CC.10.4
16S	16S	18100000	18100000	13400000	10700000	13500000	12800000	17200000	19000000	17100000	20500000	19200000	12200000	17900000	15500000	17300000	15200000	15400000	14600000	23400000	20200000	18200000	21800000	19100000	16300000	28700000	17800000	16600000	19200000	18600000	19400000	17100000	16500000	1.7e+07	29700000	28500000	28400000	1.4e+07	14400000	13600000	18900000	16600000	13900000	20300000	17400000	15500000	17200000	14700000	14800000
2oxoglutarate ferredoxin oxidoreductase	korA	60316.7	66817.2	46510.5846099199	84696.5611933426	104752.34851515	206112.328498484	99994.5768471011	156389.143431639	105462.997397319	101862.624367175	115060.227583496	69170.9643848014	83958.9562580148	101659.436523103	75308.6917418567	97192.9105930573	100564.968252405	95336.2040318521	101653.856042986	134042.762430557	76374.1496752436	85610.1964452571	65817.1946477344	59698.8003985904	136332.02851798	144208.547416147	83078.5844350238	114487.014069407	86971.4967536075	155309.395714475	146134.955074661	183776.06331016	202710.349010227	20847.8104294423	34767.691867316	19810.9061245984	114781.272637502	118676.435085794	144707.122734703	195023.436193882	216466.695809909	157094.796589571	188864.806447492	179924.062426366	137692.630922506	154327.189400351	135637.98667142	185584.078757961
2propeller phytase	bpp	6174.21	5881.14077193363	4850.57024534429	6065.60014808537	7162.32078935908	6311.6799632145	11582.3436641844	13703.4399482395	8794.47888225857	8969.306418106	9586.10603831879	4954.30604147163	7085.59019963359	7249.64429178424	7370.16317343517	9285.69870563113	9327.63881188098	6928.90897077725	8257.44818900009	10918.7109585591	8812.54581810461	7870.48496469617	6139.16586714379	4867.85467596168	10408.4460801179	8602.09040067785	6485.62879259364	6619.62258005222	7458.09556988238	7845.30315234538	14850.9457077342	10380.1814256756	13554.3570407071	4871.69902168598	3904.71067733987	3114.34226785347	8703.46196358885	7975.93290758125	10751.6695597218	13957.1840082789	10304.0056473277	9601.53789370888	13162.701660992	10591.4945793706	9522.16490166901	12526.808747657	9988.98439690101	11127.6566141455
5methyltetrahydrofolate corrinoid/iron sulfur protein methyltransferase	acsE	140127	135079.229543679	87237.8187902716	198098.313260569	177949.498536374	314008.908769249	237068.824848502	385380.380287218	204122.608881061	159325.709472328	261272.817551388	166021.690104561	195184.367190286	230522.700292813	153558.585554711	206294.47078935	217147.443551674	251523.087693567	219497.135733215	343016.782906845	180664.318845016	141326.464193685	162172.558081252	141982.429882876	315730.761262054	317557.228025798	173062.545806724	174194.014747379	205580.512416145	229988.293034087	384315.685700279	400026.667482333	539711.809945527	34719.5789132958	55135.5688919214	42487.1245705612	313713.375487966	294000.786414058	400865.710021827	427965.543312849	394984.531543991	347692.081725177	416523.04813056	423932.047125579	393594.20736153	330248.951082236	300470.150659	467781.1480285
acetylCoA carboxylase carboxyl transferase	accA	20918.7	20440.3145558736	12327.6358848955	20250.6877713369	18548.669733285	44982.0215868867	27843.34745209	37311.920289878	18008.3992455601	30782.7	33123.9582595492	20676.3002759357	25928.5977946302	31311.9920588053	20788.3061051577	27783.6044863166	28487.5906947938	34668.7238613343	27843.4378819231	40573.8640274403	17229.6076544517	32335.419054263	26727.7479570478	28156.2364983686	32373.2944015599	36745.2327242746	20826.0586946153	25095.3483601987	27393.7157003074	37725.04182402	24586.3528671583	23530.1092830179	33371.8990657818	23378.4357576417	26301.0362595609	21109.4705116982	26771.088864973	20751.977702211	27699.3710762149	36766.7129284968	26771.2770214888	23939.6501964943	28171.5042923547	29323.597405296	35473.8804572672	23644.7892216302	20590.3313115025	33708.9104538727
acetylCoA synthase	acsB	149.275857585128	0	0	219.343504336513	419.749095043001	1909.10567950205	624.032842424695	1131.37766513793	506.598745952464	354.515200460865	401.477516241126	301.735098123469	252.62191965114	544.823332317774	368.998926862971	616.896900128705	491.108805281203	528.824851098757	0	717.988303646184	388.168588164665	325.696051556635	0	306.475388612205	275.861375104448	714.952192478568	423.271559245519	351.784928204546	225.845761369838	488.776964518304	842.096981045443	498.88327465468	1180.8477906664	0	0	0	578.559508716181	372.13155019247	1202.04550391608	1306.24849828489	1015.00945555834	518.144389865194	1126.85241014788	1188.86693429909	1097.20479823796	1121.03570966718	298.127703534436	1491.4054143116
adenosine5'phosphosulfate reductase subunit A	apsA	65007.9655551877	42467.9771360363	45081.4419153442	103385.772626536	80750.9738323559	187721.480046382	111918.130472701	187726.939940173	120239.208953803	107720.128064309	110145.111957304	70858.8061071013	69321.9915375472	94294.5729914924	82849.5403188043	124365.118480231	112669.332358076	103314.161614648	66288.60160197	143055.107961825	90223.8568075912	50129.6293591902	50695.4949190231	51725.3698184741	117317.526205465	132233.350552936	89568.0435685979	75709.8226241028	83540.2833993095	90077.7915400203	176034.629436294	157652.529832183	223708.724365482	8381.78370119868	9383.4784299158	5588.5396950775	119420.54138037	110780.543650209	172815.983938567	279071.06141535	165747.538720959	157139.294959471	205006.219965647	222039.50387968	149290.336923717	201413.903744181	100089.226905255	216850.643573884
alkaline phosphatase D	phoD	506292.594296494	512598.787852814	397903.535826257	432063.697275391	543927.189362261	371492.431022378	630724.130763841	897248.210742212	650210.697506619	779077.857137304	705802.559118115	374124.225403611	449833.744338109	450264.490400223	439745.195419819	475179.381529392	484370.539861704	442880.802909429	574190.307771575	660899.418035933	548173.943156429	580523.083787412	437264.64835381	327234.891636277	724877.962597172	622263.034209181	497028.266314744	541955.00164977	527545.525985	542120.374826342	645966.670223378	600445.983671003	745078.310957461	300806.661252566	346264.41329762	239343.88713976	450458.758636683	429973.303970382	514948.631553462	696793.040247021	653281.091263335	540429.192345579	688847.422804342	652693.440767923	558742.489097185	582421.564898273	476266.828886046	613685.292825043
alkaline phosphatase/Pho regulon	phoX	8536.94679700627	6350.83127568651	5299.86489166861	10618.8571300543	10373.2242942181	7430.73835654814	9832.76018030738	20537.5484484466	14947.6909620015	16928.8267742832	15357.9139070229	8277.6456408296	8357.26225931892	17564.57711485	12344.2043659503	20634.9104238345	19522.1983430817	19169.5913910932	11953.1083826836	20827.4149389051	11998.1527856515	7773.44434649182	8180.45325353326	8449.55047041477	17603.7380197712	21870.3635477339	15978.2822319886	13939.7257231031	15054.8677301401	17481.9039559294	28305.2575174769	30831.5915713098	31954.0508063688	2570.00784672417	3134.08564334327	2208.50476210946	19694.0046297039	18890.2842114499	24011.9211397155	35088.3385118025	30188.5384827572	23018.3823796105	36298.7807727457	30945.6242762545	27688.6446803296	29789.3787980308	19531.7130285474	29246.4875380755
Alpha amylase	amyA	2190.2242083466	540.717685989954	302.755330515131	1170.61686772242	929.971776595559	1169.57471212307	1457.82853570893	3699.07043534141	803.866833103259	1666.38696994988	1713.73327238263	1239.48087675958	2167.11536328238	1544.77665678492	672.142107112971	1895.7522842113	1406.794691456	2170.21547417841	1111.80816060638	1977.16707379817	699.322317286133	555.981695497098	973.83721554145	814.575989050711	1741.46157682274	2635.62733009766	799.7183992956	958.056735996858	1252.33046090421	2582.22290985999	6522.51535834878	3593.01428790109	5076.86857988911	0	0	0	5223.21659808074	1629.79316485188	4357.4449423216	5870.71238516341	4443.44785564428	3389.87590664195	3233.70231767093	3661.07181724506	5899.28935110123	4886.46111245073	2057.47390025393	4796.64652308181
ammonia monooxygenase subunit	amoA1	13862.8197010645	14645.1078700183	12163.2826327229	59236.4164501654	20632.9235253366	20658.7466486464	53835.0904309633	87895.6942823173	60323.5803972815	54371.568429145	43696.054925879	17131.4779131963	36747.7735086915	39848.3825627247	47573.9380965059	71202.2287408958	44705.4757385526	30500.4225303961	40589.8884152887	61810.6583680423	51470.9741633313	25950.9041496247	18236.6627694348	9561.86492567698	47097.7214408555	52797.9429384674	39359.9092145403	37735.6841953778	27564.3619614086	18715.3834650502	132919.31987163	125927.315204631	155175.774393561	434.076674555558	1151.06237957681	215.506979538766	58968.9012370965	56029.5961400935	70019.6456144531	157600.57736208	115171.252016607	73927.8030523986	83735.5809789865	89818.7999570137	39162.8868779093	79319.0395648946	69535.4604400278	102500.672645629
ammonia monooxygenase subunit	amoA2	30139.4674915643	34554.0991327649	35155.6229841117	33254.1443531243	36642.1348353668	19454.0473974845	54661.3617580789	69131.9171740983	63946.4015357913	56364.0071153326	55746.3232424369	34470.5990325873	288058.059657401	269620.989475978	297287.126418551	299871.082867351	329746.140325391	248504.270145511	380150.755047388	463932.042901774	321295.311372062	225442.345199024	237947.07319743	181314.11078116	506479.529107285	372511.772488853	346231.907199465	338864.620850751	311974.390000966	208698.693324991	316073.518065218	305588.456026265	257338.592559291	116182.160780737	62287.3508165504	54986.53332307	100678.56937669	89118.833258643	117574.437148106	120233.033390099	124979.012269108	100085.877284217	156001.594712192	129889.261710888	97110.6135821653	128038.461456413	83432.3228015248	105143.327078099
ammonia monooxygenase subunit	amoB	6611.63050657401	5963.079162978	8266.42630484194	15539.9557453992	21522.1061217404	30383.7916724713	20096.6859983072	47443.377720383	31274.6969712189	21896.6088819839	23307.3677534892	10885.1102128373	17578.468334295	26334.2951148716	19150.1907019278	32104.1065382433	24491.0114212113	26191.2276732858	12524.5132751071	37058.1188182866	19595.9078261386	15981.8663165547	13280.7122561596	9771.80078171042	26351.6550438427	36730.5137026891	22352.7050766798	26111.6447610547	20446.2159866816	25556.1677360791	45445.7327682941	50247.787553636	70132.112594435	1530.6660486367	2020.17438444881	1405.00975656434	40900.4452342826	31971.9770161998	55745.6403251598	68736.245133857	67482.1775277265	44930.1429401782	60599.7786599539	62964.4259578977	48999.5056120244	59692.7307484762	32560.3702544949	67295.7620501352
Amylopullulanase	apu	1256.18781045775	1109.79707250448	965.154407694418	1270.85727003661	2011.07732108133	2723.09610925478	2527.03610480081	5209.43472892743	2222.9726036013	2095.23075870534	2441.78953835324	1429.41992217179	1570.27975298817	2101.6805165999	1258.95759776533	1460.0058231436	2046.00043087777	1829.49343665215	1544.46779684434	3004.09989035322	1003.53468605198	1458.44646984903	1320.00740415647	1394.50027550602	1829.25350872281	2516.18171664804	1574.69006712048	1863.73529003223	1695.20000201092	1871.60729779591	3955.05120341976	2727.74610439902	3193.62501514261	350.358331393694	778.599033015459	490.177463369656	2328.93321976664	2111.94931893515	3055.04005265603	4538.42125144934	3531.78362016062	2634.61281689555	3022.2475759034	3179.4664620873	2910.06505733681	2568.53475702495	2252.4353507998	3791.95098858671
AmyX/pullulanase	amyX	0	0	0	0	175.821009179852	568.666925321068	0	0	281.824737002496	232.356518729102	0	0	0	0	0	0	0	0	0	0	0	0	0	0	0	223.177805215025	0	0	0	0	0	0	225.731372072675	0	0	0	0	187.578687218063	183.480919699684	258.708563295997	146.161195986345	0	0	228.86809159238	146.920939956889	324.565569286613	0	187.048709140944
arabinofuranosidase	abfA	304752.007311366	249284.097666187	204142.203572028	190197.488400378	223256.837478267	257960.357206365	358159.476758639	418744.967742477	320501.532443605	311727.316582855	313456.462955516	238695.829283813	272816.121820405	263881.350567251	242781.786664424	221942.047344179	263852.200704899	300158.644728861	295363.521578699	364887.822220509	278530.903535552	249383.946637467	234964.562823672	234488.530181392	412607.289864054	343274.072435516	278805.982248423	273968.876463237	259814.834564417	361893.455962416	309854.002447222	311677.135804341	377657.332596131	103672.470854169	145280.009644701	114070.498653221	266766.957518019	223395.536779767	285401.274620559	351362.820100909	309727.728894998	261039.843406681	404425.040738967	350928.991470544	346970.616833601	322850.487787117	246490.584551925	345714.595713975
assimilatory nitrate reductase catalytic subunit	nasA	0	196.92940778281	0	381.275393252534	310.503692024967	915.838654384873	1066.24607850439	1068.99235901471	656.24817761731	0	408.789967383696	391.895097560742	934.632827751452	860.951522100498	0	363.714477197637	825.176252093792	837.287978472828	773.821616420184	943.822593603274	0	0	162.505613371325	242.132788965016	860.395037284839	882.21817838287	157.144464745498	218.894187099771	507.524420765599	548.482442525564	2588.76787351619	1482.50765387777	2326.03862101181	0	0	0	2221.65201901873	1108.23150473464	2228.50138518765	1067.33267299314	1063.02404478263	1097.03579986305	783.89164916742	1333.54675913969	1441.61966607614	1795.62832243331	1069.83138590219	2694.39780112047
ATPcitrate lyase betasubunit	aclB	9276.1673454787	8095.06937213749	10738.1087600359	14034.3976512122	45128.2786672209	35300.2653241462	21637.0200195946	51574.6869971261	28796.3279144432	20740.1484728685	16801.5840442009	13172.4279169204	15316.7643583436	23110.8382590863	21961.7075046581	25740.7139217772	16440.5264748867	17921.8919963785	12343.2878611805	32315.3131989302	21310.5367268004	15004.7406623705	8704.81142393866	8013.19302643294	18732.6361056698	29947.8053915247	22734.0645115241	20397.4195411235	9798.12429004498	21086.8510298274	39283.855998249	38526.8892255708	53680.1748014618	2022.73714273553	3321.57344667171	1256.09457536126	33081.1071270182	21251.8867098748	40637.8673500555	61444.1872759701	48445.6835529416	23717.7671067286	60002.4574883514	58454.5401402162	37331.2642758969	48118.2081959417	23386.3440607152	46766.5911893717
carbohydrate diacid regulon transcriptional regulator	cdaR	0	0	0	0	0	120.14396753998	0	0	0	0	0	0	0	0	0	0	0	0	0	0	0	0	0	0	0	0	0	0	0	0	0	0	0	0	0	0	0	0	206.588864397983	146.663418721349	0	112.193785131316	0	157.529991031914	0	0	0	0
carbonmonoxide dehydrogenase	acsA	1275899.81619374	1147623.87553398	1134291.81531666	1048092.89684532	1381512.34000808	1317200.75098662	1655230.37299335	2115780.45515771	1761108.4885842	1881303.48957422	1510157.44730172	1037547.12344878	1751257.59176377	1666248.21881491	1788883.68460231	1930667.95353677	1652607.50555736	1534400.9396524	1955180.50118724	2421215.07604744	1949752.06053881	2044049.8994197	1475449.56010854	1328151.4611848	2278945.27643118	1899196.94190781	1700838.53957726	1802628.48180423	1480522.26928601	1815577.24051282	2071863.36106754	2007524.9163205	2405702.51032776	1348930.11149466	1333435.02980819	872748.960164607	1641406.07206279	1479794.78370613	1645522.8159509	2832734.05839342	2432053.2971684	1675003.81395116	2676326.15230585	2402012.41789226	1915647.94546049	2255378.55618473	1598771.26773097	2035385.68323872
Cellobiose dehydrogenase	CDH	5137.14205068818	3450.07530754869	1753.54452762493	7879.88315467011	6142.80555726522	14981.1091989292	8668.78929220543	14615.3964716302	6017.13991840407	8535.30138927646	7952.8946354001	6986.309649573	6642.78247104921	8486.73610827454	3235.49030732695	9630.29493550035	9967.51093621217	9517.5212639631	6644.14126105137	10542.8582993051	3514.79814065214	8863.17845382997	3721.26302064702	4746.22807998864	9263.38889023766	12284.288355432	4417.25110484443	11679.6607596062	6324.07401616698	20528.7605901418	17715.9771063701	12214.1695468706	23511.8564424368	978.846177771623	2783.69635009783	581.69635178146	11969.0873285268	8633.88961958714	16885.9659178373	22282.8021499115	25690.2356548845	14105.7375861115	12160.7969733686	13199.4321611425	18604.0157354642	9766.82591574923	8946.75067514247	19810.4670884743
cystein phytase	cphy	0	0	0	0	0	124.660243149711	170.704687512436	188.777661077112	0	0	0	0	0	0	0	0	0	136.861361415251	0	0	0	0	0	0	0	156.942657533494	0	158.685128804553	0	0	0	167.387469614835	211.015774087275	0	0	0	193.107008327358	125.789818965664	132.308854176606	377.098499370453	124.920319993511	114.284623069904	0	236.216509771775	0	0	175.510189344377	279.590052343084
endochitinase	chiA	4365.63653066805	3521.34498522991	4637.27443562039	7911.5718708647	9105.68806422304	7362.32474172096	8860.70845012943	20244.2923769215	10974.3324012335	11128.5059171464	8563.04504727147	6895.02476969619	6851.14297767638	12130.1088535733	8195.88966377419	12406.5088004643	7428.49304083989	9640.66197665698	5430.37545194185	16263.850346643	9740.41336649155	7437.57731966829	3111.04553153224	5580.98177624999	6785.34441456522	16524.4876294528	9205.28180001031	6574.68921681343	5384.68055803977	9571.09726981329	13797.9990399285	9804.08220856952	31660.9485032849	2527.94400151809	3390.11835153277	813.467750141494	11295.9831447647	6456.62394040414	14964.1794763992	22773.1341351128	17360.7741799529	10893.3084289585	18892.0043939167	19642.7481463319	14651.8916416232	16309.943136598	8116.65963793927	21609.002283757
exochitinase	exc	0	0	0	0	0	0	0	0	0	0	0	0	0	0	0	0	0	0	0	0	0	0	0	0	0	0	0	0	0	0	0	0	0	0	0	0	0	0	0	0	0	0	0	0	0	0	0	0
exoglucanase	exg	21113.3707939883	19961.1507658213	16277.615977514	14575.6448480493	17118.1082536276	22546.5953057417	28019.6977945602	38024.5953391988	23817.7158859432	22766.6882695397	23136.0507735992	15611.7227741616	37024.9969126955	39723.8833741862	37168.3346865802	34144.7225362871	33785.3732190698	33839.1819657995	45726.8049759894	44879.330485526	41104.1231398689	36385.4284802684	35734.5540962754	31067.5212743821	32212.0153024633	28838.123827616	26469.704198156	27097.87460198	25226.2063665742	39429.9957198437	39382.7565129718	36577.9148190981	36812.0430615219	13332.1579218699	17657.282281776	15084.1672820587	29462.5298594719	24424.8830031246	26506.5929195996	33852.1926834871	30111.4790383009	25912.7079450049	41345.6703729601	35067.0512672718	33525.4563477346	37320.0697628922	26423.1344583679	41078.4185268019
exoPG	exoPG	822.37627905169	1336.66191755063	1283.3549745671	1394.61000871024	1596.24580340446	3655.19852376399	2994.0665334661	5818.06542914105	3221.78911871298	3355.96065887269	3169.80998200525	2009.35573460241	1300.5349597435	2372.27863830196	1636.68877217944	2227.47884415099	1278.56473251906	2292.39712852041	1690.94646213544	3952.87762484947	1890.11569325475	1367.86895701711	588.810257674634	1633.29489409703	1502.75401417163	4365.8619827111	1936.43573287552	1428.30589518525	1133.51153553274	2353.67085679825	1806.40077286161	2208.42138644261	4042.91789276844	834.557855326223	724.831168200041	0	1816.20988758223	1815.93580645503	3588.16089145707	2655.31961827003	2800.48395023199	1180.49948038691	3038.38664097589	2906.99475563897	2686.27640940657	2532.85569253136	1195.25160280779	3728.13573080395
exopolyphosphatase	ppx	0	0	0	0	0	0	0	0	0	0	0	0	0	0	0	0	0	0	0	0	0	0	0	0	0	0	0	0	0	0	0	0	0	0	0	0	0	0	0	0	0	0	0	0	0	0	0	0
fumarate reductase flavoprotein subunit	frdA	135006.467795278	130059.648177358	100726.512715612	81348.9174020215	101580.598777613	87571.9397609865	130424.580014568	174991.357797913	139027.306987373	161695.100665555	146168.647585391	102160.457861333	111556.025007761	110769.373187736	116262.619328155	119124.087778676	115906.747960651	107163.738461546	137003.877066499	149588.555846933	108488.92053399	135408.053027009	104078.102850409	112053.287939102	160886.608466745	134905.296972421	108706.393609746	110319.485744387	113280.966110444	148897.953916939	128961.510232221	131302.484604322	139781.250491002	181824.938486755	91767.2801449915	84399.5906123345	84537.4289986915	78625.6940484837	97966.3456756051	141484.806172537	105723.391896075	100215.246778484	136512.379862614	119903.054914323	118164.684073085	119450.355583096	91696.6215147448	118471.180339628
glucoamylase	gam	100126.163292114	91112.208728908	53312.1010246284	87272.9744057072	111225.346785936	131673.982069682	169542.446954906	208221.993927918	128714.984992871	120456.672229254	134193.731283048	53151.1702107812	123724.877070233	124397.226650632	82800.9087277373	130658.175049026	133763.529883702	89430.7464704046	131703.360800407	157748.547631403	100217.228452496	93487.7039345286	67346.3971727654	42428.492793718	176441.156904096	146773.280885343	98465.272704513	103711.335967384	104492.938944735	81755.2648757895	216170.840121388	208415.946117293	250785.787963935	27316.7764966525	34342.575367061	23011.468794336	149463.11720894	125800.246501275	170932.99743698	221526.050229128	213016.423176752	160994.78196572	192306.090046366	176946.203210635	138140.396486225	166260.256778756	142625.550843975	191336.451526655
glucose dehydrogenase	gmGDH	118180.976702317	116696.431247399	86075.9447984478	86892.7971387485	114761.645970961	86976.9090149295	130211.231666342	170194.139316712	148433.220539218	153423.137938676	164526.261226972	83634.3778704521	123877.100325168	132962.967172937	122426.970578401	126670.530078145	139758.657695345	109008.623533738	154346.880860938	168636.418252177	129675.337798538	166222.761702198	136686.10474647	106523.052847395	189969.944888458	154600.182520342	121202.363274403	141578.474559924	141349.71729421	129318.819045599	164459.933529387	169203.344925768	167366.263842718	168216.057178707	181771.528849386	158400.788836533	112240.872932576	119191.556750755	108395.663574341	187515.772842901	168406.592309473	134783.521879565	161459.289823504	153459.31252094	111807.953454408	142124.008163139	124671.255985893	146252.640383673
glutamate dehydrogenase	gdh	56239.9045420435	65273.0001785525	50251.1260842176	81729.1115145597	92988.3985834473	205624.552266278	114526.357147702	187044.783632294	117573.138221968	136914.946501929	146047.53412002	89612.7553013575	85852.714440311	110052.445656834	94359.6025920614	136959.003652438	129772.514839988	121868.890071179	129205.457271024	188053.910771834	94429.2168741776	121136.631703213	89888.7554044197	93301.4953783028	140701.554855434	156519.337974386	106334.963917715	99370.9012516606	102334.23426389	136208.349347806	149315.574779942	154518.308109798	202634.748343231	86416.2565614812	64094.3665917969	51534.532427303	103447.746790711	113556.629092849	158108.751163988	229861.271212959	180878.974893296	127462.314495763	225160.41368467	184136.23047026	170240.034321002	194430.971822178	111252.898541871	193674.175325624
Glyoxal oxidase	glx	7441.79281661091	7165.3032423055	4937.96262378078	18779.9649629794	19331.4650445108	24064.8395079688	20850.8347761393	28699.5178682454	15076.2770745019	18183.4740482492	18519.2429313521	14051.472270355	13315.0263729808	15469.7287296828	9296.62050571686	21799.5027776528	30459.0757405661	20244.6305579601	11470.2757175395	20173.5054257559	10730.189403998	9209.12766547208	13570.703667085	12005.260948659	18724.3563062185	20421.8932784646	11432.2598718867	20019.2696202444	27327.9430660449	25494.9831886328	86950.9057644303	34313.8101597275	55054.6392684183	764.172578270026	1255.26049179575	1149.45861621218	28592.9546648908	0	36850.1201630263	58229.1974142093	53656.8394757259	52890.0284042484	35153.5377679654	30050.9529328406	36587.0756333272	37584.9906815579	27871.8203943252	40359.7730440871
hydrazine oxidase	hzo	0	0	0	0	0	0	0	0	0	0	0	0	0	0	0	0	0	0	0	0	0	0	0	0	0	0	0	0	0	0	0	0	0	0	0	0	0	0	0	0	0	0	0	0	0	0	0	0
hydrazine synthase subunit A	hzsA	0	0	0	0	0	0	0	0	0	0	0	0	0	0	0	0	0	0	0	0	0	0	0	0	0	0	0	0	0	0	0	0	0	0	0	0	0	0	0	0	0	0	0	0	0	0	0	0
hydrazine synthase subunit B	hzsB	1408.35965318665	789.882650622234	704.42668316861	1639.17672078402	1937.16122966981	2900.68767504179	2909.59436470856	3445.66935943892	1586.74489737539	2023.40053764416	2580.86464736506	1668.38712866205	1632.10100037728	1993.24047840352	1101.82875736927	1999.33048479435	2721.07004142594	1213.93897662962	1715.48868311549	3087.90100929433	1467.74087145833	891.816480265117	1021.47647061275	882.156430773981	2072.69259933708	3056.94765548797	1350.37406390167	1380.33095886755	2269.39944448468	3350.58569458419	4177.40046159775	4419.12151962621	5060.55234424164	214.920305544108	234.195130091315	258.907326424216	3117.83433710078	2442.67952506076	3430.68551114909	5455.41513424652	4172.87223839188	4070.13486806858	3693.11675639937	4363.68354828338	3560.13689753929	3612.27201789147	2959.37727638956	4516.02893012497
hydroxylamine oxidoreductase	hao	497.397473387627	551.788410936958	353.366844511462	445.606767264945	955.379170675381	1753.30701185526	777.559168924648	1751.68737934391	905.42631054592	1034.5723352067	769.720810880287	431.640145911317	291.267501866031	557.6743864857	202.685697177921	429.902121150435	586.006888047792	473.533660621933	301.38376740257	537.852720234174	577.653471948731	255.27688608019	203.041759038514	425.378567509981	875.019832960565	662.282077292307	463.258170836142	695.964726231366	721.846648187213	463.227922473022	1145.39454489335	1651.47477366206	1146.83495448975	268.038049735702	362.784614019554	146.042863621806	821.828192862768	396.2803082089	1136.98807144447	1402.235003892	1205.67453429642	963.970625822921	1083.44292494543	799.573235392435	626.725980087668	1139.8860713675	740.727272007984	1312.74301281073
Isopullulanase	IsoP	6144.21741403281	7587.9170547244	4020.19203103491	8386.01775735635	6962.60517408738	23741.7085667139	10031.097389854	23822.5694078245	9512.66297568913	11874.2683939955	9311.21229624422	8811.09392278044	6476.62916187675	11464.2513212448	5959.24311142844	11071.9620348876	8748.22049769899	8672.91032162487	10849.628239264	14315.8246246701	5847.54251394353	4194.50284793195	3839.41774031879	4404.29706936562	15597.8915610681	18078.3172044041	5625.61604908559	5154.37757302355	7887.23796758935	10878.6681744317	22589.7336552612	21242.9557383037	28179.6063086093	1506.67453914832	633.866587863693	725.633526150902	12653.8603054533	14665.0143436829	20288.9657201629	24442.1724649535	14380.801378728	14935.3292213594	19614.0843170287	17314.5117040109	17758.312663565	15954.6928158198	16810.2562893439	24445.3756487397
Lignin peroxidase	lig	8834.26809785005	10138.0534098902	5312.51046253205	7467.57817388582	10226.4469197695	19440.3450778592	8183.82712753401	26879.9589380996	14983.3564155874	11211.5294243423	10621.3624371731	8435.22809377364	8339.7307770094	16075.9889191679	9517.54859943244	9793.04134269194	10477.6701170957	12756.9794457241	16892.26389312	23717.3066864479	11838.9282354052	4809.61699606107	9699.67911686576	7830.59214496983	23821.1594833558	19409.8420960975	10221.063538123	7799.90348291199	8754.61282819958	13115.9795219108	15905.7118478386	23538.2376984955	31793.3229379679	1490.78306056015	1692.88657135705	939.817094129564	15307.033606026	20396.5395616804	28937.226814505	28105.2727419917	25037.4495980189	20942.9473177477	26399.6420230807	23947.172813992	21839.1986247485	22364.9250405749	21755.8639726027	33107.7536788519
manganese peroxidase	mnp	29968.8152806373	25356.924344367	22163.1149201282	63165.4766482487	57550.4559193078	58319.6581522863	57625.5982213432	83759.4083481159	58600.606435711	62900.0312274354	80886.1619649396	37722.3578519989	39732.7871725026	47426.6771913294	40795.0155614159	66483.3030256446	62721.6855498446	57661.7549061088	41651.9038713967	64862.1543634344	46770.3250235441	38075.0509891409	35710.8647786127	32038.4579213072	59394.0440500542	62766.0794636559	46687.0128984061	47784.4100674654	43609.4836196029	49976.142345841	92177.3270614918	81956.9794968344	119432.059496305	10859.4904897964	12309.8244639539	8188.89570759655	72368.410798746	52877.2051322065	93791.808140289	138092.726427976	111719.526930654	86584.2302324007	115877.745731454	106417.793107678	93318.0592593788	68027.4899607027	63120.9221179103	101327.823779053
Mannanase	manA	72986.6742606672	50090.1779852387	62767.7843028119	91764.515865924	130592.35945686	138934.457511273	143250.599088782	176356.552705598	143036.906977385	124850.952810799	112142.756947048	81492.9108507356	100366.095887566	122985.722885108	112663.724200079	139346.667820852	119977.475865856	138350.857671253	91783.7626297585	176821.214598771	112764.756899834	104028.537659208	58827.902945455	64936.7582902456	126782.378979566	166397.961789343	118404.467240578	135590.489532954	112185.297564051	146263.75875309	220828.493857698	187906.993626568	303065.095871529	40866.3122777606	49678.4297416608	31895.5679651032	175022.158542634	133231.062729279	188839.094102616	319620.630715209	258291.484319946	188792.962010762	309067.997229706	274041.444638413	210335.558095534	244902.064899358	143227.804485273	252563.574472661
mesaconylCoA C1C4 CoA transferase	mct	316782.78665997	301806.490227903	289392.184661468	502296.067065909	653322.730507815	0	799415.283335859	958931.535161713	807802.346537256	682789.542735596	766558.367646776	211788.722479122	451726.980856236	600949.112552552	491080.967878575	655904.465935016	753809.698609531	369416.131233815	474344.486987696	722685.547173345	634048.366460034	438944.380680454	414986.88070448	163277.974568899	721795.045594813	786368.307908188	555661.219903122	582330.086340634	608592.987942885	354040.324333515	1157868.15701392	1089521.84977984	1527062.88341878	103442.843292558	152408.033686941	78070.7479395676	735927.50646413	597685.186533551	1025337.65844956	1327690.3667281	1250193.07237023	950856.10722622	1333386.45136042	1084127.21891513	615927.646387102	1029756.27457707	658073.397303757	1152932.05856338
methane monooxygenase component A alpha chain	mmoX	7407.58382785045	6769.17239758206	6637.09139957325	15071.5104041886	10698.4477135724	13520.4444963327	17575.0855176789	23075.5786830552	16023.4898793375	18460.2620226739	12533.3229006567	7494.81350492635	11802.2560107012	15382.8816291206	13593.7758073203	15669.2997268323	13533.3626869844	19009.1131497598	11192.1071009475	19665.2453621254	13698.1963780017	6290.79443032932	6435.53071250177	7256.07234996411	14111.0683912134	20778.6344273437	14925.3006457192	8952.14748915961	11254.2600014322	17689.0182470803	26100.7574226537	25343.2287871376	38391.3091053232	3504.93081188288	1537.79293036849	1265.0722811022	18134.1012264639	17881.9753589821	27905.6349306644	49827.2368460615	23860.6949259691	23372.3187337801	39112.8117667682	39958.6905836726	27914.1043823087	31377.291103153	17281.8143235413	37092.9791486042
methane/ammonia monooxygenase subunit A	pmoA	80657.4662096697	70004.1158533387	54596.75091664	86000.064642755	120918.226419893	83790.5362080383	155971.211994387	237810.81481888	135963.4294473	133313.417290222	178235.097773065	56998.1592859302	122683.181815438	156436.718783563	103620.361512736	146294.698403526	167495.336950522	105059.385386299	142247.242884381	205387.670625726	139718.652339457	114409.606950665	102347.058944575	54921.2741849906	229888.844163784	191375.351910318	124910.828245134	163801.633608282	177724.76318775	97079.768031416	243372.27979797	261820.075773521	293900.903642467	22549.3718980221	31554.1045381239	21197.2899322762	128528.380605398	144810.646388712	187645.393919036	257779.1600065	232230.409530154	193647.012046291	251928.927558115	194762.458609794	170862.083619774	202425.139345229	146040.17165577	200643.786624168
methanol dehydrogenase	emGDH	15800.1996562348	19724.8438967069	13508.4586698213	21987.7999846006	21064.8207802077	45083.7434387681	31089.04968247	51374.4991482298	37351.2474080614	32127.4947325515	25638.359252116	16798.2032101279	30984.1817120422	32578.020944208	30730.3922075076	36826.5968871445	31544.0694930013	28595.3130759552	38275.4986544722	50593.3421492291	41895.5974451997	30682.9062853069	27778.4729122912	21215.9070687063	44951.7803246961	48761.9429818362	34853.6357420924	29573.9428101162	28554.1307754358	35098.5140181023	38134.4169229463	38437.8373047332	57960.873431924	31441.513920991	29093.7605408135	11447.4126958205	30785.5584200724	33421.0809321948	42323.0452143291	66941.5561888635	51209.9188985313	29264.6140071761	63108.8168090279	50802.1682265541	0	61946.8813129022	30457.9265302734	55895.611974013
methanol dehydrogenase (cytochrome c) subunit	mxa	35973.0759700704	22687.0785579519	26157.4135325414	45174.4400107007	44176.4454500681	46383.6552020769	56191.9944386372	80636.8586915356	62332.2939962148	55126.8098712982	53484.9049947581	41730.4272008856	28843.3055711709	40816.4940590423	43822.0916822937	56978.837967368	43268.6874205578	45028.8500213308	34381.2654465324	51422.4032156983	38424.5144256936	32890.9557612613	30950.0508755322	26966.8739037042	68088.5203850596	68209.0502339419	52763.3167697016	50025.4758845474	44233.2596007105	59422.6109123762	89361.0185714336	67099.7565099286	89387.5268246931	9335.54011192911	9302.41820489761	8409.54192499549	59267.4218450815	65103.9729545998	69477.1361276126	113942.778141125	89049.8286317489	62319.4770398578	118174.299851407	99665.3619450457	90520.0318663686	87937.9722190338	57632.7489263291	73447.9561997612
methylcoenzyme M reductase alpha subunit	mcrA	0	0	0	0	0	109.612976154575	0	0	155.418284308331	0	0	0	0	0	0	0	0	0	0	0	0	0	0	0	0	0	0	0	175.66568931649	0	0	0	0	0	0	0	0	167.936265811799	423.346436404322	0	168.002246096475	0	0	0	0	0	0	0
Nacetylglucosaminidase	naglu	0	0	0	412.383022769728	148.340168671695	335.605422792998	0	424.423674451912	0	267.569040367245	345.485025810495	236.978982625597	134.955637478551	207.864199997337	0	518.559491650529	427.856092782769	420.023757506897	0	312.837905422358	0	0	188.003254458192	261.233942278123	0	361.814528945686	0	0	0	379.641543063393	245.474345294083	246.347945233426	590.249898920291	0	0	0	187.714592799098	163.960974960326	358.628589712513	1176.07442038828	430.841062305377	431.64906076214	347.358585752915	288.147096825171	215.668986861478	246.92351290175	156.515133052554	532.676718181227
niK3	niK3	20304.7933971844	15677.4554332991	15168.6104550586	20900.4567777761	18208.0638853051	19761.3663571839	29946.387978647	37943.7806433484	27074.2297753845	37537.112422062	38279.4094113736	27351.9208267016	20672.8346500487	32639.7405678651	30075.7941111586	26718.8393018618	34171.2385954683	26533.7636164529	30221.6281318781	45024.0304475243	32194.9227961194	22527.4738175118	26386.8997599499	18015.5947631399	51929.112073295	53319.1235944012	35425.5081072577	28025.7490372771	36422.3483912556	53978.9869810488	31964.2199463161	29087.6706510626	41502.0855581693	11523.2888764675	11213.3882674234	12420.965057914	36204.5401495326	34899.4427172601	50603.5410655943	75399.3851111617	45643.3054407403	42384.3766415294	64207.2453362455	55929.2825453752	57596.314990312	58927.8297672228	37340.1737746253	55120.6988805123
nitrate reductase alpha chain	narG	4632.17090991094	4057.45371980022	2122.06556641543	5132.87605888473	6210.56009513451	8436.74591034113	5349.08435671748	9500.80929828152	6103.67091778743	7346.03276480765	8394.95222031291	4227.74544864335	3242.19424811045	5966.33587279259	4278.30855600391	6106.37663951616	5022.71713738047	5205.99630806034	5670.85910798219	7062.01067069954	4473.91149041695	3955.91082982354	3560.1341847966	3721.45356514891	7202.4441072699	7993.07710332429	4903.56671062452	6224.61118386703	5265.61308558794	8254.53721638509	7582.28510303682	9567.24607074883	12634.2923321962	4293.9941587548	3769.0236276469	4231.4707196199	8013.80989258314	7755.24445901585	9851.96609048969	13078.3454375808	11989.776513738	8603.94846145376	10984.5188360471	9787.1951576954	11549.7796355712	9855.33626206641	6370.01323612413	11583.9777690716
nitrite oxidoreductase	nxrA	9087.23114201056	4047.85153102183	5618.69940479832	5578.53006078829	11039.6617874921	2136.21996502552	4863.6626817074	8027.02472964959	7443.36147616614	7721.75220993247	6962.90113427244	3414.57637105443	48974.2767396117	57404.4682282112	50148.9798810975	64535.783640765	63543.2934897187	40692.7327116476	76472.0719848727	62638.5029269172	57496.3648844896	75458.2091031076	51624.9170974735	45060.5620432219	77787.1565960993	64484.8957858043	38322.6989967496	52293.9236776802	51023.5820200861	49037.4332450382	50691.1460870712	49704.0690816859	45675.7746250455	20057.8532395558	24374.2274803787	15428.8778247798	26760.9197496799	19760.6621066113	34532.4115714836	47342.2401562175	33454.7730480869	37859.9294422095	46601.0860246154	44751.5671351301	34990.7859997071	36425.8292037327	33029.5255044134	32999.0711319716
nitrite reductase (NOforming)	nirK1	4929.42853626577	4040.08567416979	1812.46153436157	5188.7742690752	6365.62086390115	6728.51104496771	6786.00924393466	11681.8493421202	7680.38711568707	4826.96179086608	7322.10965785599	4358.30711940608	4568.12554435165	6188.77506360616	4753.20016063325	5041.96222940855	8628.54802863712	6710.1596907347	6976.82544533774	9282.31643443154	3173.4845476445	3278.32868389369	4217.45412463401	3520.96416006371	12559.7182406583	9054.74037355386	5780.0698673032	6944.50394092049	8213.39943910542	8280.97988908563	12128.9752652313	8013.71594299417	12221.0612685555	722.214908670517	982.711096492004	800.34703439829	11585.853580495	9285.50422829562	7928.33346721961	12138.4938934268	9221.70208894936	8295.67635453655	10574.7239218882	10213.28023291	13017.2335893716	8822.1095603262	8822.59482309569	11872.7060479366
nitrite reductase (NOforming)	nirK2	442.524759646762	304.224071899018	537.000633904907	834.887151802166	1452.46196489134	1297.09256412028	1408.25871293521	2397.74835081259	1404.47854869906	1314.52200649945	962.015852766847	1536.74861602998	1585.18893057285	1954.4235999682	2092.03093955122	3003.96997783989	2160.44254351498	3058.61529388072	1510.83785359051	3320.97318896858	1619.97155175745	1080.93229788219	633.410658805299	1174.525917204	2144.13880452783	4468.84202321493	3335.0095972835	2678.65775626702	2276.95236064259	3336.2203716939	4457.0664643742	2953.41818222793	6115.02055736805	254.795321504608	443.201131015818	0	2485.00367696192	2446.22551719842	4591.39765809842	6328.50028758658	5692.50063902666	3169.67548008058	7296.05397066995	6430.07810543721	4689.12379185076	5716.97702503969	2049.20465968897	5340.27615082049
nitrite reductase (NOforming)	nirS1	35381.1198660156	23488.0831060631	24448.8141017227	26762.9989891289	34807.2544845941	127023.761640024	48308.0433008117	65640.1554602558	42711.134796266	53869.1175240212	37530.5759058672	25884.264597517	22282.5572480235	25707.7281154275	26531.6404445158	26386.1233254361	21780.8949714481	26871.1254071238	27942.0880860337	33592.1939762689	24785.3689429108	19719.6632192931	10129.2984466945	13253.6227406754	45413.7010483272	48174.3653885393	39993.8384540704	42462.36984658	34509.2041892811	44351.7468688605	51657.9431968152	41864.6962200205	46224.2551116949	11619.2862046	13042.9809512074	3813.23297597832	46956.7505471273	35811.5807975371	44322.9755526561	57503.3046967183	73563.4498861565	40760.9033411449	76898.8841403514	63038.8451288116	56249.6336380592	50321.021308506	37551.7632976738	59474.7623556853
nitrite reductase (NOforming)	nirS2	11301.0962786139	11692.9091364754	6592.63145678327	13690.5462797698	13938.0740818209	110276.752857053	24488.2328920099	20049.1793550494	17794.7180178558	14442.2833395008	19506.0003963132	10536.1472284224	8241.85616374273	11202.8545689886	6861.24777775375	8641.58861849273	12419.8319871414	9679.89966594583	9176.81248077238	15159.7615212102	8184.67403914573	8537.59390664154	7663.5036263979	8337.30336842293	19462.4673376483	18910.8914742032	11328.2568670594	10729.6913366781	10772.0148691418	16375.468348447	22209.8748006228	16947.6288402929	22171.3900004645	2770.02985156512	4214.63393852205	2798.52596086657	17189.8875491543	14508.0315748561	18081.7686531461	27924.139836806	22089.7646107543	16495.0942076558	24934.9807865983	24782.2222966331	25695.3003317307	20643.0301517094	14644.5602372782	28578.4529604273
nitrite reductase (NOforming)	nirS3	1941.21024576851	1545.98250472016	2628.49889248384	4858.26027308291	5605.64729292929	7094.12717388566	6610.60864007859	11608.6468862032	6425.82820377286	7275.28248943062	5875.16717428992	4915.85235576142	3794.00615388697	6339.52469846798	5048.45050888883	8109.15474337223	7721.21633568391	6813.47796576949	4612.85557520145	8363.40964745223	4872.20314734393	2754.25720123378	1807.86654139262	3319.58355461622	3576.34079541878	8410.30996764571	4756.93358585526	5015.15348370413	3773.49643664028	6722.29752111224	9040.93007680764	8727.32088239878	13519.4779369632	820.155967734596	1089.32848450207	414.157318446662	6711.22865460267	5423.31077909561	11584.5430650968	18233.2801214396	13054.4652956777	7943.99203883268	13476.9009943664	13890.2559470096	13632.3490718383	12939.1112493442	4954.95066555868	13412.6538133267
nitrogenase iron protein	nifH	26252.5548703197	35126.8798202266	26757.2082263034	39499.6982273913	46194.9784126088	847479.047194961	42159.2083157738	82379.3955329341	62341.3367529742	61703.6508711552	50287.4054130244	38656.7047837504	30276.4555375117	44535.3324047947	41401.6932339577	60553.268193728	51491.4024676927	48038.7674255566	41032.2051491786	59756.3922597107	46667.6989912317	34083.5241688119	27960.2060288601	29789.7325661142	75603.499211781	60954.8128668787	47648.8132004397	46525.1978547815	39293.701732582	50500.1571896333	71461.3325659636	66498.0552134177	90038.8462554154	16277.752817961	12439.4122258335	7986.77298075535	49748.6197164975	56680.0848997465	69471.8570865875	102596.324892666	83002.2925777378	64561.2306572244	89317.3929044256	86171.0228958617	74812.5913713104	84787.8156558823	58358.2600247884	74522.2082362395
nitrousoxide reductase	nosZ1	25430.4224580018	19968.4601012164	24157.2113180689	33649.5125740433	36763.5776777677	37238.4820583648	45901.3487518873	61475.9998625321	58662.5733691664	51334.4438211923	44580.5301412602	18878.558527748	22713.1846188359	29529.4731227814	36095.2540719851	42421.2623559787	39223.804970674	31658.5380461983	29911.5457914977	43177.8854127589	43794.1788845354	31196.0418012849	24401.3226365321	18936.1028778676	41989.4220270584	45861.0508999515	44902.7653561845	40172.5341585491	36783.9144796187	40313.2424003234	64529.9175772759	54409.0250899193	95169.0910386095	16709.9999778308	18624.5959610376	13506.671582947	44234.0837304521	36212.8321871368	56528.9486542767	83599.3314125103	72454.4539972478	65697.1908984511	97583.8701035461	76633.4271602127	60355.4786109759	61352.8083625907	40671.981819985	61038.0591011871
nitrousoxide reductase	nosZ2	0	0	0	0	0	0	0	0	0	0	0	0	0	0	0	0	0	0	0	0	0	0	0	0	0	0	0	0	0	0	0	0	0	0	0	0	0	0	0	0	0	0	0	0	0	0	0	0
periplasmic nitrate reductase	napA	24677.6371852245	24169.1610083579	29680.8817285873	41260.0526371832	64485.00955072	28718.1176033018	62236.8275526545	78077.0868574203	76896.5951470763	65483.0442307436	46875.2102517946	30097.3896400904	35063.2389195731	37472.0711639515	41234.7250559299	47426.2283405506	35072.5805105676	38360.0227253328	29310.2050971773	52068.296523634	37032.1893163329	29004.8413024649	15682.6470070676	22444.2761947027	60611.7602533145	63468.904505226	49876.9729396224	51840.3862508734	39132.8018833022	49483.1946369012	64213.7614587713	57975.8259103498	75602.459008158	10441.2248739547	13623.1287161581	2117.05597071762	50434.4205699296	38731.2480916387	45964.0097785761	74458.9322638988	70104.0467078064	48441.4127268584	78270.3071179858	59801.11041998	54855.1867820798	69048.2135710068	44498.598686374	64476.6871989732
Phenol oxidase	pox	0	0	0	101.123426667211	0	183.701190005012	0	244.40585234115	273.813029518817	436.019448295867	0	230.702250282827	0	433.382826970361	155.725990941148	236.351078260773	175.406515328928	305.452620821304	0	474.114643833638	221.100328577632	0	0	0	0	320.99110832054	0	189.817053969695	133.95932305251	320.961344009333	567.030096046563	216.654116014137	603.89289688884	0	0	0	199.748274165861	0	403.123307275556	471.59023542485	380.632693360553	239.556412285889	519.201618857012	483.261556427091	389.219596576055	431.726241345245	310.484078580648	609.124005592114
ppk3	ppk3	0	0	0	0	0	0	0	0	0	0	0	0	0	0	0	0	0	0	0	0	0	0	0	0	0	0	0	0	0	0	0	0	0	0	0	0	0	0	0	0	0	0	0	0	0	0	0	0
propionylCoA carboxylase alpha	pccA	55335.0841677579	41987.2639104945	48648.2025211791	46701.6019254742	65170.6073684482	76136.6860500165	81772.5322782462	91560.1722334617	81587.4031924542	88795.8892913898	63152.4536391452	50663.5748592176	69161.2813716993	76207.3216155918	73963.6105403018	71354.3719572848	69318.9093251404	73561.3779412247	76739.3042538618	119562.880489834	76311.921315927	71062.3382663579	37909.1779739576	48967.1248093083	87491.9098378253	90104.1931990123	76695.5361951821	85736.7918327775	62869.9252829176	89502.8222493192	79360.082457653	81411.9100739622	92829.6945371788	36247.6160793453	34611.6943603175	13669.805650077	58447.3783458704	55017.0743450304	60889.0093679852	93200.8351917781	87890.530944056	59512.4459778739	107783.935755395	81322.2242002972	87805.899888181	89329.6118472388	59114.542760135	81194.7063352959
putative phosphonate transport system ATPbinding protein	phnK	306800.861561545	293563.174156634	242450.898754672	282433.220175188	328247.758033552	508738.926982284	435277.72887355	526956.299863947	412254.220417537	503648.866709284	507412.578201901	266931.502289606	347396.173908044	376411.339475442	360881.9020979	391172.74525797	385369.838359255	325658.828154432	439402.837808034	552035.960707212	407652.760880594	357786.948053227	344529.463010871	265633.964732519	555392.354182951	816926.534028532	380948.342267633	424443.833846149	399546.144505649	385010.638463968	469271.425593483	456801.944795807	514235.342194363	211675.916739174	229896.235583149	154257.51826738	394523.64387879	361994.933439822	311759.652261401	575592.072907663	549701.710099349	463909.002334867	622311.802796443	510454.748608613	450849.609832175	517593.062767919	348812.736844963	492991.82240472
pyrroloquinolinequinone synthase	pqqC	55246.0935982332	53758.6773305889	43962.0360813164	36632.0124131673	44030.5153354954	42930.4034253051	51144.9133201463	51395.0864552311	52883.3684848775	62726.0386121924	57335.0543731976	39138.1984207541	43350.1925642796	35660.85061672	41047.1589516747	52480.2128688278	34205.2462103832	40438.2968286854	46106.4683373187	54645.6214707867	0	52807.6077193734	41241.8717370798	39370.1984950614	67108.4018933966	53072.1891865781	43877.7235985074	48909.838490735	45058.5222314856	44539.3351508377	53283.7902925009	51218.1566654574	73418.7390591876	69307.2152475566	55516.2164064954	35261.8700048959	41289.0638008323	37609.6673416745	44002.3537721083	75952.9775835533	60333.9957048804	45183.4928305456	69675.0097106453	61790.7189381918	51873.398060681	64754.5734443184	43971.5054457249	55705.9667235359
rubisCO large chain	rbcL	266226.679127014	258360.177872784	233612.350099648	148598.620489758	241085.321149465	287130.92473883	288893.284756257	326938.150105884	313375.550867686	378740.598437982	293753.620994477	186915.290770007	296660.709446576	302535.050950405	320737.02983437	306082.562053075	305049.080911955	252290.475787125	371803.828481963	445321.198730734	361902.337327001	398573.56723902	333290.831832342	295176.381418158	486232.402390748	358485.837001429	359778.40162917	372024.231909074	329187.96124491	403666.519350967	337159.274299839	327174.874288198	346473.418738865	355517.062867527	463929.362219804	349951.081530613	208326.268860044	235630.49310183	220495.590275614	364742.024372066	271678.38571602	243399.566414486	391132.620722469	341981.212898672	264834.584250054	292293.694673821	240725.631542187	253764.995706591
succinylCoA:(S) malate CoA transferase	smtA	64141.7160484698	38074.006075492	40005.9693940551	75531.6162003566	61288.4684048993	176301.484691356	104755.165400097	165011.267766935	95854.6333647705	103075.834862714	121042.03837796	53326.9604948723	63501.7992912321	93723.758902681	67651.2932443165	116611.555347583	81092.1324099585	130199.361900214	68857.4376305841	153574.591730919	70263.5984802404	44463.9963317819	61590.7322238075	62749.1149138148	91469.4139901701	136306.636820703	74270.6266155402	51279.4346752936	102350.494252016	131827.109585683	146992.477692254	139539.429872224	211381.960428183	15552.5085696535	13305.6121536033	4265.48422400877	107919.279122037	86098.6797751603	157242.850592688	219284.938912785	69376.1328838998	162739.058922076	191592.735379299	173554.248054975	169582.759585043	182946.222654798	90246.2853306231	201272.627172932
sulfer oxidation protein	SoxY	39960.00877008	39166.3927753412	37884.4335782858	69948.398839963	95757.4932402314	79925.2437911244	108542.90655464	168609.717580494	127699.180550679	106961.592684922	97264.9188311925	40305.3624251098	77676.0318209821	111369.35339361	69398.8227156616	103944.996257924	86123.9065091137	78653.2831682552	106648.771570269	142180.281402531	80533.6509385503	47157.7953702441	49139.4585965966	34932.8970841989	105197.373491453	124675.466617557	86089.6789127727	83535.1445981253	79782.9231365895	80475.5085723745	206779.323613831	175966.884220202	210369.571034851	7108.4424107021	10732.0789779562	6116.23748399019	141691.577567988	107744.346677982	164137.157597315	246457.366852683	208053.050588184	146565.853118774	234128.368022215	195880.971042113	140819.79189261	193724.454612033	118994.074282064	200246.399193153
sulfite oxidase	YedZ	64016.4482274947	55902.9305177676	34476.7086140034	84259.4806007594	93541.8098709736	151560.479165692	133878.687769025	186147.668458764	90246.2387095096	92556.0604500227	127181.876566714	75316.9683760386	88542.5511418437	96241.7914016657	70082.4221279183	113539.398191525	110508.000462857	89336.8953617871	88778.1022998134	146331.34669383	77357.4932295052	61795.3069209584	74460.4004006016	49479.1926220515	132232.404975398	141596.65772677	85955.9783937204	80373.7494475369	125315.544138636	136757.996549899	186896.905361823	169672.689605311	225829.629167162	23625.6871801591	16347.895766635	18886.5807595859	138379.588777936	123094.172205467	162925.067040049	243938.755681104	190385.157691349	177381.286441552	199617.695671837	198186.582254763	169832.45914914	180826.654283134	125176.941124729	196156.956888255
sulfite reductase alpha subunit	dsrA	5470.73369769079	3959.90324705591	3764.60832560433	4616.92455358369	1828.97920837577	453964.580768193	5567.16953482661	6978.55653144255	7937.1778253352	6717.42553854742	6916.97536140021	3450.56990884347	3671.33513862724	5614.99919287805	5098.70755666612	8415.14469599312	6251.07516214209	5122.94691654547	6882.47840529807	9425.04363319252	6292.56032914511	2969.43958417337	3006.67417426819	3915.16982119677	5910.93109527411	8385.13390341646	5958.98219847502	5263.61636735098	4209.53324971514	4762.40943486283	8802.805586463	8324.49590903216	10581.3461398616	1723.44111462915	1081.86696567699	965.927076125122	6659.50632412015	5969.45238050419	9590.88996395961	14786.9227547262	9357.16069827851	8108.09447186392	12532.3650828295	10917.2246791056	12054.9301468441	12131.4984456312	6911.03885654608	9575.06465939216
sulfite reductase beta subunit	dsrB	383.953450520834	222.32309252528	0	235.263079620464	330.93657545809	847912.367098231	266.864894415798	469.66219226737	273.074476898672	0	578.413244277625	182.320637479541	168.778075681184	303.644695166389	141.30778963649	312.62563577281	349.537455841746	0	0	235.453618656684	0	0	143.145060767377	706.219336336122	332.331032416042	0	238.799321247588	0	290.404234180765	0	572.548274799562	646.597385490256	660.888083832913	0	275.780693902516	0	708.766260644439	179.160593353852	853.290495819751	849.209422282161	336.758904484753	595.628952983162	589.660502103146	285.997507540595	906.01147488365	564.084864494868	764.674019255747	813.180049963209
urease	UreC	2150956.23935535	2134084.31996505	1724927.31052799	1284315.65891069	1770148.77345601	1924916.82993971	2196066.2971237	2840452.95684455	2340076.79702733	2739421.50701834	2538658.17929416	1626308.12104293	1957915.88975014	2039424.80950457	2046605.34082787	1956309.60830231	2000330.33390301	1835531.55852745	2586651.12669223	3016993.46486194	2424456.45337001	2644554.32979793	2224361.48818593	1884428.24200238	3258561.31039246	2627592.43180463	2308910.44310117	2353180.43401855	2180062.49843647	2562623.06037301	2129512.09162129	2072525.793362	2293886.47827901	2522414.47122409	2709853.79520957	2211084.49958548	1757401.67371185	1770942.6288742	1845979.64701426	2583686.42971713	2281182.79827981	1942172.49899038	2977117.92721491	2503901.54582738	2185509.49770444	2352834.86422696	1877570.85299149	2279505.87259998
xylose isomerase	xylA	94789.5747395694	99309.2209203797	107342.275723764	150112.126650893	163816.170198493	197012.131466627	179336.399763482	355257.782763038	238114.098543719	226715.31636627	153903.75948906	137305.783499539	156947.004440525	226360.006727299	206279.040735376	260137.874798013	206316.385564603	192488.973174652	237000.824791581	332449.259124109	234233.165688325	145029.214109489	71307.6899121418	108779.135845136	251304.286680797	290867.368813536	223281.164261072	196921.088949911	130046.882057552	211704.324721547	316058.234925132	310165.110794512	422243.450022494	46756.1183564452	42166.9180604838	12370.0182410226	241431.557282546	224354.348771217	311430.331733572	424690.752204312	231020.802449283	238162.181817706	424525.750002808	397156.109995444	294471.113228882	359970.115091705	238758.221256957	374942.538499388
