# Supplementary material for: Soil metabolomics and bacterial functional traits revealed the responses of rhizosphere soil bacterial community to long-term continuous cropping of Tibetan barley
Source: PeerJ. 2022 Apr 7;10:e13254. doi: 10.7717/peerj.13254 (PMC8995024; doi:10.7717/peerj.13254)
Supplement: Supplemental Information 18 [file peerj-10-13254-s018.xlsx]

## Sheet: Table S10
metab_id	CCY02-1	CCY02-2	CCY02-3	CCY02-4	CCY05-1	CCY05-2	CCY05-3	CCY05-4
metab_0	3.90783	3.94307	3.86001	3.8724	4.07283	4.14192	4.0244	3.94948
metab_1	5.37998	5.41373	5.3888	5.41611	5.34679	5.41334	5.37996	5.36706
metab_2	5.25641	5.31142	5.28313	5.21799	5.22287	5.19469	5.24064	5.24842
metab_3	3.31189	3.51677	3.35892	3.46802	3.61091	3.72912	3.54061	3.59739
metab_4	3.66405	3.81832	3.98608	4.11449	3.90946	3.65042	3.66509	3.80558
metab_5	3.77949	4.00801	4.16653	4.19351	3.80031	3.6787	3.71731	3.86408
metab_6	3.11962	3.48014	2.50438	2.48139	3.48419	3.94273	3.18694	3.12086
metab_7	4.55668	4.51598	4.57907	4.65137	4.66959	4.89519	4.72445	4.62137
metab_8	2.82489	2.83439	2.97659	2.88167	2.04802	1.9635	2.25551	1.91039
metab_9	3.05538	2.98918	2.95882	2.92392	2.67534	2.94274	2.95489	2.73438
metab_10	3.97992	3.94538	3.98641	4.0151	3.72279	3.7385	3.69354	3.62903
metab_11	3.83862	3.80744	3.78998	3.8157	3.92269	3.99661	3.9615	3.86002
metab_12	3.89575	3.85708	3.87581	3.98401	4.05268	4.24766	4.10971	4.0266
metab_13	3.6477	3.64353	3.62356	3.6404	3.54502	3.59046	3.53511	3.52352
metab_14	3.88185	3.83738	3.79287	3.88517	3.93746	4.1189	3.94209	3.9038
metab_15	5.0672	5.03984	5.05063	4.99532	5.00294	5.02783	5.03113	5.07205
metab_16	2.33921	2.30081	2.31476	2.25629	2.32996	2.36556	2.33039	2.30891
metab_17	3.03111	3.08792	3.01955	3.01179	3.25224	3.36219	3.33796	3.35795
metab_18	2.76011	2.82633	2.74362	2.75457	3.0178	3.12071	3.09334	3.15075
metab_19	2.62417	2.58287	2.64954	2.56815	2.54842	2.60319	2.61307	2.51569
metab_20	3.18107	3.21436	3.14797	3.1668	3.37555	3.49072	3.38654	3.25425
metab_21	3.30415	3.27724	3.28896	3.27473	3.63852	3.67994	3.7593	3.69468
metab_22	3.92287	3.83896	3.90027	3.95061	3.73845	3.68938	3.76733	3.67658
metab_23	3.3044	3.35243	3.22695	3.50997	3.30216	3.58733	3.30716	3.38039
metab_24	2.84604	2.94827	2.63393	3.29341	3.9488	3.50104	3.51396	4.53162
metab_25	2.58037	2.2806	2.42081	2.39335	2.42353	2.49954	2.6004	1.37413
metab_26	3.63462	3.90035	3.61188	4.328	4.87397	4.12865	4.31439	5.32432
metab_27	3.70225	3.67625	3.68743	3.72105	3.8333	3.78628	3.85999	3.82543
metab_28	2.99668	2.98776	3.02546	3.0677	3.15333	3.16767	3.14602	3.47548
metab_29	3.79621	3.75007	3.77428	3.78821	3.81158	3.80963	3.89711	3.81266
metab_30	3.55868	3.48473	3.56047	3.59295	4.81384	4.75554	4.89495	4.73752
metab_31	3.86157	3.96137	3.8516	3.85389	3.98267	4.00152	3.94168	3.85647
metab_32	4.26194	4.25154	4.20482	4.22577	4.22312	4.25023	4.31225	4.1593
metab_33	4.34819	4.3234	4.30331	4.31047	4.19495	4.28455	4.22713	4.1589
metab_34	5.64965	5.67575	5.67766	5.69305	5.57291	5.54078	5.56159	5.51125
metab_35	3.38016	3.28999	3.28682	3.30244	3.42029	3.52888	3.47968	3.32397
metab_36	3.35329	3.55228	3.33088	4.03678	4.64746	3.81281	4.08638	5.12661
metab_37	4.55437	4.53847	4.66564	4.65758	4.40427	4.38426	4.46298	4.32465
metab_38	3.79666	3.80108	3.78318	3.81328	3.69363	3.7545	3.70792	3.67417
metab_39	3.64978	3.62746	3.63631	3.68978	3.69217	3.78716	3.7141	3.68076
metab_40	3.53091	3.52786	3.52174	3.53431	3.42056	3.49179	3.44712	3.39328
metab_41	3.04532	3.08011	3.01584	3.15699	3.30807	3.39667	3.20029	3.24028
metab_42	2.65674	2.81497	3.1869	3.08261	2.80354	2.61781	2.72669	2.91809
metab_43	4.10298	4.14197	4.08115	4.13543	4.02695	4.0546	4.01213	3.96161
metab_44	3.40541	3.37432	3.42866	3.48753	3.50314	3.75263	3.59853	3.48524
metab_45	2.98985	3.02599	3.03648	2.94962	3.04266	3.12411	3.0158	2.99298
metab_46	2.54252	2.48002	2.59327	2.49127	2.58162	2.59978	2.5872	2.59251
metab_47	2.82589	2.82345	2.87525	2.83644	2.70518	2.79042	2.80496	2.65999
metab_48	2.29196	2.19228	2.35161	2.30859	2.30271	2.45603	2.38568	2.33854
metab_49	1.87378	2.27367	1.75591	1.75546	1.98611	2.17477	2.23199	2.27622
metab_50	4.1195	4.17043	4.12023	4.17838	4.20737	4.41021	4.32518	4.24022
metab_51	3.26352	3.30077	3.2462	3.26348	3.45597	3.59939	3.51695	3.32576
metab_52	1.79779	1.69494	2.2496	2.0225	2.63498	2.4468	2.97397	2.56005
metab_53	3.75605	3.78748	3.74572	3.75563	3.88682	4.05184	3.89451	3.7878
metab_54	3.35416	3.87222	3.09517	3.91725	2.7313	2.84489	2.82488	2.83986
metab_55	3.53519	3.53207	3.48442	3.36901	3.6844	3.77138	3.57609	3.70253
metab_56	3.95578	3.97389	3.95904	3.95417	3.9265	3.98848	3.9561	3.89719
metab_57	2.37677	2.3677	2.34428	2.32526	2.35699	2.38529	2.30628	2.22348
metab_58	2.09663	2.25021	2.19713	2.12584	2.62142	2.72288	2.62305	2.70861
metab_59	2.56282	2.63882	2.55337	2.54328	2.81485	2.96767	2.88593	2.96901
metab_60	3.04268	3.07114	3.08202	3.04644	3.04131	3.08121	3.05665	2.98509
metab_61	3.97402	3.93063	3.91172	4.01618	3.7542	3.8361	3.82656	3.76166
metab_62	2.89583	2.88192	2.81346	2.88648	2.85878	2.90243	2.77848	2.63247
metab_63	3.70201	3.71466	3.68228	3.69148	3.59782	3.68081	3.62817	3.54861
metab_64	2.45026	2.46798	2.51381	2.50007	2.46199	2.64767	2.50759	2.3635
metab_65	1.13413	1.2821	1.35985	1.2395	1.83779	1.55137	1.54889	1.51896
metab_66	1.57612	1.60639	1.58593	1.63354	1.41573	1.59322	1.85947	1.47192
metab_67	2.74497	3.12573	2.73633	1.99024	3.79054	2.62637	3.22511	2.6526
metab_68	2.70429	2.71773	2.64118	2.69216	3.1377	3.19874	3.01161	2.9831
metab_69	2.63858	2.63027	2.71281	3.01275	2.78758	3.15239	2.90081	2.81819
metab_70	1.54615	1.70136	1.59991	1.73286	2.15944	2.43202	2.35791	2.17589
metab_71	3.14318	3.17045	3.12443	3.15239	2.98	3.06032	2.98901	2.97046
metab_72	1.51593	1.59583	1.57124	1.64167	1.57795	1.7136	1.65421	1.73524
metab_73	3.90516	3.9581	3.90626	3.92091	4.04396	4.17129	4.05074	3.93649
metab_74	3.55881	3.55768	3.56882	3.63507	3.72647	3.89234	3.78256	3.69681
metab_75	2.9232	2.94126	2.91773	2.91009	3.31164	3.35651	3.3201	3.21436
metab_76	1.84488	1.74304	1.82685	1.70549	2.23846	2.21248	2.0909	2.19285
metab_77	4.32169	4.35018	4.30312	4.33083	4.4044	4.56057	4.46715	4.34777
metab_78	2.58064	2.59207	2.59625	2.6288	2.71375	2.71814	2.85136	2.61192
metab_79	3.81763	3.85699	3.82403	3.8312	3.93312	4.07224	3.94145	3.83445
metab_80	4.08655	4.12239	4.08343	4.1182	4.2101	4.35002	4.278	4.23086
metab_81	3.97146	3.99622	4.00902	3.98888	4.06901	4.2725	4.10429	4.00112
metab_82	2.43983	2.3947	2.41617	2.46327	2.61037	2.74314	2.68713	2.88363
metab_83	2.75245	2.74363	2.69695	2.75797	2.85705	2.94996	2.79627	2.76155
metab_84	3.65777	3.69121	3.67135	3.68371	3.75482	3.92909	3.83772	3.68424
metab_85	0.805414	0.719685	1.45027	0.735697	2.76208	1.72392	2.52883	1.22389
metab_86	2.7132	2.64355	2.72342	2.68487	2.60449	2.83616	2.69536	2.63014
metab_87	4.19476	4.18697	4.23222	4.21389	4.37739	4.49865	4.36774	4.28695
metab_88	3.27238	3.38663	3.31251	3.54196	3.43684	3.3482	3.37326	3.55138
metab_89	2.64595	2.77215	2.69373	2.77214	2.98442	2.90555	2.93492	2.8982
metab_90	1.51597	1.39364	1.79115	1.63842	3.02868	2.36269	2.72046	1.70106
metab_91	3.5241	3.5381	3.52483	3.74023	3.59274	3.62168	3.56404	3.57668
metab_92	2.16112	2.02492	2.01575	2.14385	1.55544	1.82803	1.75935	1.75822
metab_93	4.13923	4.13627	4.10798	4.12932	4.0311	4.09916	4.04186	4.03122
metab_94	4.28739	4.30773	4.26026	4.35434	4.20949	4.31056	4.23217	4.18354
metab_95	4.23149	4.22584	4.20498	4.22154	4.12315	4.16192	4.12956	4.13367
metab_96	3.84229	3.88565	3.79812	3.75761	3.93574	4.00264	3.84994	3.89053
metab_97	3.99228	4.00089	3.973	3.99839	3.89918	3.95574	3.90215	3.87264
metab_98	3.83719	3.81558	3.80171	3.88024	4.15871	4.18794	4.21061	4.16658
metab_99	2.67333	2.71922	2.64226	2.79054	3.00745	3.1268	3.00755	2.90845
metab_100	4.15073	3.97615	4.04786	4.09957	4.16282	4.24344	4.08503	4.06919
metab_101	3.86942	3.879	3.87789	3.96119	4.5518	4.39858	4.33085	4.27623
metab_102	3.3606	3.34035	3.53439	3.64176	3.86217	3.87399	3.83053	3.83874
metab_103	3.64528	3.68898	3.60151	3.56981	3.79512	3.82349	3.85367	3.7083
metab_104	2.21396	2.22997	2.0277	2.38207	2.525	2.84511	2.51772	2.43904
metab_105	2.67199	2.74427	2.68977	2.66983	3.03364	3.12746	3.04784	2.82937
metab_106	3.57927	3.58568	3.58536	3.56671	3.54889	3.60365	3.5413	3.54542
metab_107	3.64971	3.23226	3.59067	3.18376	3.23772	3.27407	3.20083	3.22308
metab_108	2.7017	2.66122	2.67572	2.78527	3.87256	3.04401	3.50113	3.39867
metab_109	2.47881	2.5974	2.47754	2.61227	2.72591	2.86115	2.77547	2.62337
metab_110	2.61736	2.53283	2.5851	2.78706	3.57705	3.73855	3.56124	3.51726
metab_111	3.74718	3.70405	3.74905	3.75012	3.65944	3.82161	3.66543	3.66342
metab_112	5.43178	5.41964	5.4005	5.41559	5.31819	5.33554	5.3084	5.26077
metab_113	3.72147	3.6752	3.66402	3.65025	3.78597	3.81712	3.79558	3.71709
metab_114	3.46197	3.43747	3.46539	3.59179	3.85711	3.81169	3.77929	4.16255
metab_115	4.22129	4.16351	4.22957	4.194	4.09157	4.06754	4.08693	4.08714
metab_116	3.69526	3.68202	3.63799	3.64604	3.66144	3.69293	3.70538	3.67176
metab_117	3.67626	3.62982	3.64724	3.66876	3.73277	3.70912	3.77959	3.72731
metab_118	4.14612	4.10384	4.13156	4.1247	4.18245	4.18168	4.22589	4.21657
metab_119	3.9907	3.99738	3.89493	4.07253	4.06101	4.00565	4.07588	3.98596
metab_120	4.17025	4.17545	4.1518	4.16182	4.14902	4.17958	4.23666	4.08853
metab_121	3.36126	3.34254	3.60815	3.48035	3.58986	3.38395	3.431	3.53018
metab_122	4.15526	4.14471	4.16111	4.16394	4.14355	4.16656	4.21178	4.14141
metab_123	3.11511	3.01127	3.05595	3.09275	2.97674	2.9665	3.04269	3.0654
metab_125	4.03275	4.13777	4.04476	4.06253	4.13988	4.19388	4.15623	4.0599
metab_126	3.65119	3.61721	3.55431	3.59773	3.5474	3.63614	3.54156	3.5237
metab_127	3.81405	3.51407	3.78942	3.49032	3.51979	3.59852	3.54663	3.54692
metab_128	3.39687	3.40287	3.40795	3.37607	3.3048	3.262	3.35433	3.25004
metab_129	3.39851	3.35351	3.41406	3.37248	3.44727	3.47716	3.50259	3.54303
metab_130	3.38372	3.35955	3.3987	3.2899	3.53273	3.50608	3.55405	3.58076
metab_131	4.27297	4.32899	4.21668	4.33578	4.10698	4.26325	4.03666	4.03711
metab_132	4.01764	3.97875	3.9992	4.01019	4.08404	4.06653	4.11533	4.10641
metab_133	1.11494	1.79305	2.46569	1.96241	2.07934	2.04234	1.90854	1.88059
metab_134	4.26756	4.22872	4.26613	4.1697	4.20681	4.18045	4.23041	4.22829
metab_135	3.263	3.39047	3.28564	3.30957	3.47771	3.4849	3.5096	3.44692
metab_136	4.10856	4.08696	4.13182	4.0001	4.02989	4.0198	4.07141	4.05708
metab_137	3.21158	3.17449	3.09777	3.15754	3.23594	3.28824	3.28593	3.06101
metab_138	3.46829	3.40909	3.40742	3.42996	3.54851	3.61584	3.63044	3.55783
metab_139	3.71207	3.6714	3.66724	3.70061	3.81241	3.87009	3.85686	3.72211
metab_140	1.80611	1.78959	1.79608	2.29127	3.27902	3.38529	3.2675	3.26489
metab_141	2.7047	2.62596	2.66253	2.6698	2.61374	2.62553	2.60875	2.50766
metab_142	3.09162	3.12411	3.09625	3.14794	2.98643	3.04682	3.02877	2.96398
metab_143	3.41226	3.44154	3.40773	3.40975	3.3157	3.36975	3.32604	3.28203
metab_144	2.9234	2.97557	2.96266	2.93462	3.08004	3.20196	3.14797	3.0042
metab_145	2.80585	2.7005	2.79844	2.82435	2.74975	2.96118	2.93974	2.27144
metab_146	3.04856	2.93116	3.00969	2.93827	3.1167	3.18025	3.19331	2.97414
metab_147	3.33826	3.45965	3.29377	3.33487	3.55556	3.74231	3.57202	3.4865
metab_148	2.45675	2.44201	2.27673	2.52395	3.23894	3.00032	2.99271	3.72808
metab_149	4.48434	2.38326	4.33655	4.18898	3.76549	3.79436	3.68344	3.61741
metab_150	6.09604	6.15071	6.14819	6.11161	6.08629	5.92077	6.05953	6.09079
metab_151	3.66424	3.6704	3.65594	3.64646	3.51115	3.25942	3.60386	3.50662
metab_152	2.92589	2.87637	2.81126	2.7589	3.52758	3.69187	3.57489	4.29106
metab_153	3.04404	2.95085	3.02045	3.09023	2.81136	2.80187	2.82332	2.76844
metab_154	3.15888	3.05438	3.04335	3.03514	3.33036	3.4125	3.3747	3.25573
metab_155	3.85621	3.85104	3.83593	3.84751	3.84984	3.93375	3.86625	3.82263
metab_156	1.76677	1.63739	1.61555	1.74208	2.30421	2.33403	2.1757	2.27737
metab_157	2.67281	2.56781	2.77846	2.67997	2.90463	3.00075	2.83844	2.77539
metab_158	3.81435	3.81258	3.77853	3.81111	3.89223	4.07969	3.95587	3.81855
metab_159	2.17214	2.15616	2.11532	2.16899	2.32201	2.38741	2.34101	2.16263
metab_160	1.95464	2.16815	2.36208	2.47987	3.01515	3.65438	2.0241	1.99974
metab_161	0.92411	1.47135	0.86903	0.58445	1.56737	1.54456	1.7612	1.41977
metab_162	1.68798	1.68327	1.71092	1.94513	2.5149	2.93636	2.20998	2.14411
metab_163	0.617852	0.0451686	0.0465976	0.0471548	0.481924	0.0602221	0.985706	0.352944
metab_164	1.17118	1.36978	1.63474	0.910662	0.238822	0.125672	0.785183	0.108823
metab_165	2.6294	2.58823	2.57633	2.60391	2.72358	2.84721	2.75073	2.62542
metab_166	2.16742	2.48421	1.71468	1.86163	2.30544	2.30972	2.01511	2.19984
metab_167	2.1387	2.08316	1.93146	1.9625	2.30287	2.3327	2.24135	2.1511
metab_168	2.4718	2.42542	2.50108	2.64163	3.14437	3.19661	3.10303	3.00442
metab_169	2.4535	2.60254	2.44787	2.46004	2.72985	2.74262	2.66537	2.55164
metab_170	2.40071	2.48665	2.51628	2.40704	2.47088	2.55435	2.55766	2.45768
metab_171	2.40103	2.39098	2.43667	2.406	2.53198	2.59264	2.51666	2.48349
metab_172	2.18259	2.23666	2.15486	2.16639	2.07367	2.152	2.0832	2.01287
metab_173	2.93782	2.9981	2.85114	2.92365	3.20028	3.30312	3.2159	3.27569
metab_174	2.43765	2.46437	2.4504	2.51179	3.01857	2.96677	2.56241	2.5731
metab_175	2.36898	2.24026	2.42206	2.28294	2.52442	2.68086	2.4881	2.53184
metab_176	2.89177	2.93978	2.87843	2.87996	2.99118	2.98222	3.04586	3.06339
metab_177	2.17359	2.07848	2.14932	2.02051	2.44863	2.56581	2.54648	2.64643
metab_178	2.40026	2.33824	2.36817	2.34627	2.47259	2.64929	2.56636	2.57244
metab_179	4.51771	4.61434	4.56754	4.56609	4.62123	4.58444	4.65048	4.65647
metab_181	2.36587	2.27669	2.41625	2.26457	2.49342	2.56835	2.43881	2.39401
metab_182	4.1497	4.15379	4.13011	4.14078	4.36995	4.42203	4.38661	4.29971
metab_183	4.58399	4.57981	4.51834	4.56546	4.62163	4.71377	4.62733	4.62433
metab_184	3.17049	3.22999	3.15472	2.99826	3.30052	3.4032	3.27194	3.3447
metab_185	3.17163	3.25986	3.19384	3.20518	3.37153	3.50144	3.40542	3.32884
metab_186	2.51846	2.50198	2.51914	2.49739	2.80164	2.83677	2.72361	2.73208
metab_187	1.70231	1.76052	1.75191	1.76485	2.21603	2.19546	2.69675	2.09139
metab_188	2.44754	2.42722	2.41735	2.44321	2.27323	2.24198	2.83723	2.32447
metab_189	3.75989	3.85278	3.73598	3.80519	3.85003	3.97101	3.86798	3.75571
metab_190	3.82439	3.81182	3.79944	3.86169	3.95522	4.12209	4.06038	3.93058
metab_191	2.61223	2.69184	2.60453	2.65285	2.50161	2.53466	2.50726	2.46229
metab_192	3.50119	3.59882	3.50551	3.47148	3.54522	3.66601	3.57807	3.48184
metab_193	1.68201	1.63721	1.47534	1.63706	1.80935	1.72736	2.41249	1.7102
metab_194	3.0351	3.08609	3.01504	2.98907	3.19044	3.32534	3.22649	3.11512
metab_195	2.97623	2.93262	2.90392	2.85314	3.13411	3.25962	3.1626	3.1867
metab_196	3.65743	3.7413	3.65906	3.6898	3.56687	3.56119	3.52211	3.47114
metab_197	3.42702	3.51427	3.40678	3.42344	3.48836	3.64777	3.48748	3.3945
metab_198	3.47925	3.53842	3.4957	3.5474	3.6377	3.8261	3.67195	3.57885
metab_199	4.0176	4.08948	3.99668	4.01055	4.08559	4.21814	4.11271	4.021
metab_200	2.11265	2.17675	2.22258	2.24895	2.68476	2.72743	2.63046	2.56516
metab_201	3.82402	3.88227	3.80769	3.84987	3.90152	4.02501	3.93601	3.84709
metab_202	3.07189	2.98184	3.09791	3.23342	3.1497	3.19161	3.19524	3.07857
metab_203	3.36071	3.40017	3.34929	3.42643	3.52103	3.65612	3.56028	3.47305
metab_204	3.19558	3.37148	3.22068	3.43574	3.1588	3.24974	3.13275	3.04612
metab_205	2.91459	2.9635	2.89396	2.99127	3.06863	3.25921	3.13557	3.00794
metab_206	3.57718	3.62913	3.55279	3.59177	3.63929	3.75794	3.68048	3.61395
metab_207	2.59668	2.65194	2.62117	2.58185	2.65513	2.78474	2.72109	2.62856
metab_208	2.76598	2.868	2.77311	2.80942	3.18583	3.32251	3.16234	3.0458
metab_209	3.38426	3.38402	3.36721	3.31655	3.60011	3.66254	3.52607	3.57276
metab_210	3.51266	3.58097	3.50568	3.56257	3.69176	3.84626	3.74435	3.64318
metab_211	2.88037	2.93587	3.07712	3.00906	3.29089	2.96919	2.96762	3.02478
metab_212	2.60452	2.57092	2.63817	2.56701	2.70665	2.83753	2.78965	2.73967
metab_213	3.93598	4.0177	3.90431	3.95443	4.02409	4.14466	4.0722	3.97207
metab_214	3.10435	3.09275	3.05132	3.07318	3.25913	3.31278	3.42084	3.18645
metab_215	3.12246	3.11894	3.10338	3.20973	3.24009	3.34458	3.24889	3.14771
metab_216	2.85855	2.80521	2.80243	2.70267	3.15542	3.1094	3.14859	3.11467
metab_217	3.7734	3.7809	3.72711	3.68354	3.97002	4.10089	3.90527	3.98797
metab_218	2.86433	2.90291	2.88988	2.84945	3.23668	3.36351	3.35103	3.2206
metab_219	2.25472	2.12194	2.19916	2.36085	1.20376	2.79035	1.89086	0.884446
metab_220	2.34901	2.33064	2.36006	2.35313	2.61459	2.66672	2.60594	2.77883
metab_221	3.26491	3.24652	3.17402	3.32816	3.64217	3.66688	3.61907	3.68872
metab_222	2.43412	2.46777	2.37289	2.42851	2.63959	2.62104	2.89991	2.41199
metab_223	2.60077	2.61211	2.55846	2.59552	2.97553	3.03854	2.93324	2.92898
metab_224	2.59458	2.64992	2.53245	2.77299	2.83687	2.88276	2.70936	2.79049
metab_225	3.05108	3.01854	3.01472	3.06103	2.84329	2.95812	2.88854	2.87879
metab_226	4.27744	4.37359	4.24367	4.27506	4.1677	4.23829	4.18417	4.14838
metab_227	4.21084	4.19524	4.16678	4.19646	4.09266	4.15176	4.11063	4.06186
metab_228	2.25568	2.0659	1.99006	2.07234	2.39275	2.4368	2.39313	2.37599
metab_229	4.1552	4.12313	4.12033	4.12731	4.08175	4.1226	4.10094	4.10725
metab_230	3.36733	3.39882	3.40457	3.76577	3.4944	3.6179	3.46524	3.38634
metab_231	3.73204	3.71387	3.70627	3.682	3.67209	3.68987	3.6819	3.64822
metab_232	3.01491	3.06291	2.97523	3.11675	2.92249	3.01691	2.94498	2.84586
metab_233	2.57319	2.6534	2.60518	2.70224	2.51691	2.5819	2.55594	2.45204
metab_234	2.64889	2.65488	2.62393	2.70457	2.61079	2.68887	2.58994	2.55446
metab_235	2.70435	2.74363	2.69083	2.77934	2.65192	2.70092	2.60888	2.54831
metab_236	3.09958	3.08047	3.05633	3.12961	3.04857	3.1212	3.06742	3.02499
metab_237	2.5489	2.61644	2.52161	2.59431	2.47945	2.52584	2.44551	2.39961
metab_238	3.16615	3.10878	3.13458	3.15738	3.20612	3.27511	3.19941	3.13733
metab_239	1.95733	1.918	1.91678	1.89975	1.86529	1.94761	1.84277	1.83394
metab_240	3.3525	3.34665	3.35503	3.33035	3.33563	3.38377	3.3893	3.2763
metab_241	1.87154	1.85574	1.9024	1.88926	1.93004	2.22668	2.08349	1.96858
metab_242	1.70214	2.00629	1.53691	1.95024	2.39315	2.49175	2.46661	2.40881
metab_243	2.07442	2.10771	1.79043	2.02545	2.43967	2.52186	2.50515	2.21034
metab_244	2.37696	2.21078	2.30632	2.21284	1.70345	1.60333	1.44891	1.58885
metab_245	2.31585	2.13837	2.22853	2.2952	2.35066	2.40827	2.3889	2.17951
metab_246	2.40212	2.34129	2.27165	2.28892	2.31784	2.4028	2.45613	2.34197
metab_247	2.73894	2.71315	2.65077	2.73447	2.55816	2.65517	2.61031	2.44491
metab_248	2.46248	2.40859	2.44622	2.46537	1.44594	1.59249	1.78182	1.64284
metab_249	1.90865	1.85477	1.90652	1.77327	2.13633	2.20775	2.173	2.02494
metab_250	3.2984	3.26799	3.22855	3.25022	3.05807	3.18554	3.10362	3.08209
metab_251	3.28601	3.24961	3.22037	3.27682	3.12874	3.22042	3.15293	3.08574
metab_252	2.5646	2.66913	2.59703	2.70397	2.0255	1.97798	2.2714	2.07222
metab_253	3.58878	3.58713	3.53716	3.56165	3.36689	3.48966	3.41836	3.34306
metab_254	1.87703	1.95959	1.79964	1.78	2.09601	2.13437	1.98221	1.95278
metab_255	2.06157	1.92814	2.18553	1.98951	2.14871	2.09919	2.18238	2.03818
metab_256	2.6571	2.69873	2.74003	2.71575	2.79375	2.6381	2.77417	2.81299
metab_260	1.88382	2.03871	2.02304	1.92673	1.96331	2.04026	1.94405	1.78551
metab_262	1.95984	2.0211	1.96773	1.93689	2.00775	2.14644	1.93073	1.84518
metab_263	2.18589	2.04333	2.05136	2.19416	2.26773	2.26166	2.31457	2.0007
metab_264	2.32291	2.2071	2.30359	2.21128	2.32547	2.35872	2.38267	2.2681
metab_265	1.94564	2.03219	2.03752	1.98553	1.94409	1.99476	1.93933	1.75263
metab_266	1.76784	1.74606	1.73509	1.92259	2.09454	2.05043	2.56704	2.06411
metab_267	2.29532	2.32862	2.33456	2.3632	2.44173	2.61919	2.43803	2.36918
metab_268	2.27393	2.25389	2.17211	2.20586	2.32557	2.41121	2.38496	2.34649
metab_269	1.97219	1.98726	1.90615	2.08114	2.15608	2.18545	2.7114	2.06317
metab_270	2.39513	2.34566	2.45792	2.26453	2.35965	2.43864	2.36161	2.46398
metab_271	2.56665	2.63801	2.5253	2.59561	2.68157	2.77112	2.73664	2.61935
metab_272	1.96615	2.09371	1.89716	1.92569	2.17674	2.41217	2.21441	2.37587
metab_273	2.03758	2.06649	2.12119	2.12266	2.11948	2.17434	2.09116	1.97021
metab_274	1.90054	1.93536	1.92479	1.91353	2.5534	2.66406	2.65068	2.43712
metab_275	2.15015	2.03254	2.21777	2.02487	2.02746	2.08155	2.0689	2.03443
metab_276	0.0682306	0.57138	0.679483	0.0675197	0.603195	0.531608	0.603724	1.12899
metab_277	2.62686	2.6892	2.57257	2.70593	2.67538	2.6103	2.57982	2.53154
metab_278	1.64922	1.68834	1.61471	1.60869	2.15722	2.17761	2.09658	1.99341
metab_279	0.783429	1.18339	0.953243	0.509797	0.806553	1.10577	0.808092	1.42118
metab_280	2.4426	2.46763	2.48596	2.53327	2.96052	3.01974	2.93945	2.82719
metab_281	2.82066	2.73048	2.78554	2.93664	2.86357	3.15886	2.55544	2.53867
metab_282	0.556445	0.538807	1.41744	1.3526	2.77292	2.02508	2.65129	1.06107
metab_283	1.85909	1.92255	1.92335	1.80664	1.35446	1.29852	1.60423	1.20604
metab_284	0.0298606	0.13885	0.0291798	0.0295358	1.10675	1.33389	1.20948	1.03293
metab_285	2.64029	2.61871	2.63391	2.58706	1.75895	1.90697	1.94181	1.75522
metab_286	2.60204	2.59691	2.54907	2.56004	1.79079	2.00031	1.99384	1.88112
metab_287	2.1217	2.14097	2.12131	2.11832	2.0679	2.1611	2.25671	2.17564
metab_288	2.76288	2.74541	2.72721	2.73267	2.88468	3.04301	2.93783	2.79876
metab_289	2.89147	2.77647	2.80215	2.8078	2.79133	2.98016	2.85322	2.73582
metab_290	1.70312	1.72872	1.62578	1.69401	1.99605	1.80488	1.80944	1.82797
metab_291	3.0986	3.10163	3.06788	3.08699	3.0675	3.20188	3.11333	3.04836
metab_292	2.04173	1.94421	2.04636	2.01821	1.75924	1.73661	1.72846	1.728
metab_293	3.44263	3.45536	3.41115	3.42754	3.40232	3.53062	3.37722	3.32638
metab_294	0.555151	0.452878	1.14752	1.335	1.65181	2.15497	0.987435	1.20896
metab_295	2.75864	2.67289	2.74523	2.72266	2.30369	2.33682	2.2562	2.17161
metab_296	2.64301	2.56308	2.59013	2.62019	2.47892	2.57382	2.51666	2.45703
metab_297	3.03937	3.04128	3.01891	2.98034	3.1093	3.24717	3.13552	3.13433
metab_298	2.60231	2.64471	2.56632	2.64806	2.60435	2.58362	2.53022	2.49956
metab_300	1.9521	2.22557	1.90269	1.57344	0.360912	0.387927	0.502507	0.347229
metab_301	1.55817	1.86217	1.97325	1.68962	1.75415	2.11066	1.88581	2.36492
metab_302	2.41778	2.51186	2.21171	3.12937	3.9335	3.60861	3.70212	3.58902
metab_303	0.417352	0.402318	0.410984	0.414324	0.456155	0.487133	0.470727	0.440354
metab_304	3.37261	3.38368	3.3352	3.32659	3.43293	3.55809	3.44458	3.3659
metab_305	1.3824	1.34411	1.27511	1.61516	1.92196	2.26935	1.73402	1.66068
metab_306	2.41541	2.43274	2.41213	2.45461	2.55078	2.73368	2.65686	2.49104
metab_307	1.9053	1.9205	1.94703	1.94057	1.7993	1.88178	1.92937	1.86523
metab_308	1.82675	2.05078	2.00142	2.08856	2.27271	2.22192	2.11628	2.09311
metab_309	2.81047	2.78365	2.72707	2.84802	2.76606	2.76616	2.67123	2.62648
metab_310	2.19236	2.26974	2.06133	1.9784	1.87158	1.98927	1.34257	1.75924
metab_311	3.38868	3.38234	3.36549	3.38968	3.24418	3.31785	3.26845	3.23367
metab_312	2.12206	2.20902	2.37391	2.21838	2.45297	2.73248	2.43385	2.45547
metab_313	2.57295	2.71001	3.08828	2.70234	2.89393	2.92503	2.61054	3.12324
metab_314	2.03256	1.99668	2.03171	1.9595	2.03787	1.98693	2.51096	2.29069
metab_315	2.99553	2.98846	2.98563	3.11587	3.19104	3.34141	3.26518	3.12886
metab_316	2.33646	2.3824	2.32604	2.30252	2.39755	2.44426	2.3438	2.34192
metab_317	3.26454	3.24949	3.28269	3.29454	3.31822	3.42564	3.30824	3.31155
metab_318	2.52128	2.48654	2.50744	2.53849	2.63782	2.72074	2.58836	2.64232
metab_319	2.26326	2.22285	2.22147	2.31675	2.84826	2.94525	2.80753	2.77595
metab_320	2.98741	3.07729	3.16473	3.05071	3.16708	3.25479	3.20355	3.18015
metab_321	2.3022	2.40306	2.30629	2.49171	2.41843	2.52623	2.44088	2.44635
metab_322	2.32169	2.41915	2.62202	1.8348	2.3627	1.69603	2.19533	2.48161
metab_323	2.4019	2.46693	2.44456	2.42926	2.54795	2.64984	2.56051	2.4642
metab_324	2.50048	2.40035	2.49057	2.59607	2.52426	2.01494	2.47717	1.98417
metab_325	3.48346	3.54418	3.50101	3.39565	3.38519	3.34665	3.39164	3.35936
metab_326	1.75712	1.62442	1.73418	1.81558	1.97704	1.9093	1.84523	1.8799
metab_327	2.3133	2.35945	2.43187	2.49549	2.70816	2.89782	2.71506	2.63502
metab_328	2.32198	2.42932	2.29171	2.32571	2.52195	2.51136	2.60565	2.36855
metab_329	1.77954	1.92754	1.69166	1.66156	2.18618	2.27178	2.28877	2.19424
metab_330	2.67449	2.6749	2.68282	2.71412	2.65933	2.78635	2.67825	2.66523
metab_331	2.36776	2.2904	2.40814	2.38896	2.44968	2.42076	2.52649	2.47245
metab_332	2.59284	2.66293	2.64859	2.67996	2.86561	3.03074	2.90258	2.79959
metab_333	1.71629	1.74199	2.17655	2.23075	1.66621	1.71942	1.86235	2.00045
metab_334	2.78019	2.81197	2.83728	2.82383	3.12127	3.17974	3.12582	3.01588
metab_335	2.34532	2.56935	2.39485	2.65241	2.4881	2.5788	2.44054	2.44294
metab_336	2.43441	2.49369	2.50613	2.48847	2.69851	2.73923	2.73552	2.72676
metab_337	2.89142	2.92966	2.85837	2.9016	3.09348	3.24034	3.12087	3.00965
metab_338	2.38797	2.40143	2.32489	2.42365	2.55058	2.66257	2.61069	2.5359
metab_339	2.44268	2.45508	2.40993	2.47849	2.55096	2.61001	2.66488	2.67034
metab_340	2.9647	3.05731	2.99179	3.04983	3.28091	3.34735	3.235	3.19741
metab_341	2.06994	2.42817	2.20498	2.35194	3.49921	3.63519	3.39032	3.30554
metab_342	1.27374	0.914479	0.633751	0.451077	1.63228	1.68276	0.721636	1.17319
metab_343	2.22783	2.33736	2.26644	2.31174	2.48547	2.62856	2.36183	2.46547
metab_344	3.21374	2.59507	2.52055	2.70148	2.96695	2.41585	2.38577	2.52071
metab_345	3.61641	3.71087	3.57996	3.77916	3.7281	3.80551	3.70135	3.69269
metab_346	2.06328	2.26309	2.28269	2.30609	2.82858	2.74098	2.70556	2.68729
metab_347	3.00461	3.02293	3.00822	3.07637	3.16255	3.21165	3.12477	3.10546
metab_348	2.9012	2.9437	2.94747	3.01886	3.11835	3.26262	3.08912	3.04248
metab_349	2.45444	2.57559	2.70578	2.64828	3.17671	3.2473	3.6586	3.14965
metab_350	2.81297	2.80513	2.80448	2.85386	2.74934	2.78699	2.82781	2.68338
metab_351	2.3324	2.10604	2.16214	2.86915	2.07375	2.43088	2.10118	2.1501
metab_352	1.5089	1.7292	2.18685	2.10501	1.94352	1.89407	1.81702	1.98447
metab_353	2.76218	2.85005	2.82945	2.74189	2.98142	2.90986	3.15375	3.12719
metab_354	2.68876	2.64309	2.67087	2.62129	2.88517	2.92168	2.89654	2.85815
metab_355	2.29859	2.27657	2.31532	2.32342	2.61979	2.68448	2.61549	2.608
metab_356	2.50523	2.52739	2.59154	2.55081	2.59931	2.455	2.59638	2.58607
metab_357	2.46869	2.49808	2.40905	2.44674	2.41797	2.45394	2.42244	2.35754
metab_358	2.43427	2.48176	2.35882	2.35006	2.68553	2.7203	2.65087	2.5894
metab_359	3.24957	3.41517	3.36862	3.48191	3.40937	3.50258	3.40136	3.39937
metab_360	2.59457	2.41767	2.41041	2.5841	1.46311	2.97239	2.06827	0.66986
metab_361	2.93628	2.995	3.03431	3.00122	3.39079	3.49341	3.89018	3.38409
metab_362	2.83839	2.89439	2.7555	2.81897	3.145	3.15768	3.07917	3.06299
metab_363	3.10701	3.18357	3.11124	3.11186	3.29503	3.39858	3.20977	3.2626
metab_364	2.13652	2.26966	2.20553	2.13773	2.51768	2.51224	2.46662	2.449
metab_365	2.5556	2.5716	2.53809	2.54248	2.69803	2.69424	2.67433	2.62914
metab_366	1.72977	1.89377	1.77303	1.7477	1.93836	1.98765	2.01197	1.75483
metab_367	2.63986	2.77952	2.63508	2.84332	2.95065	2.96587	2.84887	2.77354
metab_368	4.06813	4.05022	4.0444	4.08009	4.03266	4.08769	4.03478	3.95983
metab_370	2.7834	2.78029	2.5934	2.76384	2.66986	2.73174	2.57778	2.47108
metab_371	3.47189	3.454	3.42539	3.39519	3.53453	3.64721	3.40443	3.51818
metab_372	2.3944	2.18577	2.67481	2.18514	2.49903	2.67825	2.62831	2.41267
metab_373	2.67068	2.63882	2.64555	2.65275	2.57794	2.62488	2.63785	2.53973
metab_374	3.02852	3.04983	3.0506	3.05105	3.2608	3.34007	3.23782	3.10755
metab_375	3.41503	3.40749	3.45633	3.61784	3.55754	3.58384	3.5757	3.35668
metab_376	2.63468	2.53829	2.55728	2.5785	2.92073	2.98069	2.88993	2.79755
metab_377	1.85203	2.195	1.92945	1.85094	2.65854	2.47345	2.6009	2.80387
metab_378	3.98297	4.04726	3.92272	4.00326	3.99042	4.00845	3.91527	3.87737
metab_379	2.65389	2.59929	2.59215	2.74679	2.88712	2.96841	2.83645	2.78798
metab_380	3.18182	3.07873	3.10061	3.17949	3.2881	3.41259	3.33204	3.28882
metab_381	3.01419	2.97757	2.95723	2.97458	2.8261	2.92546	2.85997	2.83034
metab_382	3.07466	3.0322	3.06559	3.11733	3.7506	3.72097	3.62675	3.59792
metab_383	2.4118	2.39028	2.37773	2.38023	2.77882	2.42804	2.524	3.01538
metab_384	3.24355	3.18226	3.22676	3.2212	3.28444	3.2819	3.29377	3.27486
metab_385	3.92743	3.92892	3.8932	3.88796	4.06643	4.12978	3.91779	4.01863
metab_386	2.00678	2.02672	2.10352	1.73893	2.21295	2.15863	2.20592	2.01778
metab_387	2.29225	2.37533	2.27488	2.24839	2.80013	2.71554	2.78175	2.6772
metab_388	2.98575	3.04552	2.91936	3.01857	2.85705	2.97256	2.9445	2.88436
metab_389	3.20375	3.21136	3.16908	3.22928	3.02579	3.16188	3.10537	3.02639
metab_390	2.8991	2.94338	2.88805	2.96075	3.04281	3.01817	3.0212	2.88496
metab_391	2.90286	2.92212	2.78954	2.90176	2.99555	3.18963	3.17954	3.03507
metab_392	2.80451	2.81754	2.64286	2.80057	2.49199	2.59829	2.47674	2.45364
metab_393	3.45552	3.49173	3.44737	3.47372	3.35964	3.50841	3.40789	3.38417
metab_394	3.51541	3.50789	3.46906	3.58427	3.65532	3.75908	3.69168	3.5849
metab_395	2.62761	2.54029	2.66342	2.49675	2.56957	2.73052	2.59797	2.62578
metab_396	2.53239	2.58488	2.59832	2.70083	2.82739	3.00171	2.83633	2.77971
metab_397	2.78664	2.75697	2.72205	2.64406	2.79568	2.78867	2.80088	2.96463
metab_398	2.41216	2.75371	2.47383	2.53268	2.70941	2.71266	2.60954	2.56762
metab_399	3.0192	3.02064	2.99238	3.08628	3.08676	3.14071	3.0645	3.00295
metab_400	2.27833	2.3019	2.28013	2.36458	2.81741	2.94485	2.88167	2.80007
metab_401	3.49389	3.52282	3.5429	3.50664	3.50429	3.57156	3.64778	3.49919
metab_402	3.89831	3.88089	3.87738	3.90384	3.96726	3.99151	3.96182	4.07881
metab_403	3.13201	3.10308	3.1115	3.16508	2.93526	3.07041	2.97698	2.9501
metab_404	1.48299	1.43964	1.63154	1.59251	1.75429	2.03639	1.86538	1.90212
metab_405	2.35681	2.44064	2.31708	2.71507	2.57281	2.68834	2.51397	2.69618
metab_406	2.71344	2.53102	2.64305	2.51382	2.85616	3.05692	2.88281	2.86588
metab_407	3.27377	3.29123	3.46383	3.34465	3.23984	3.20905	3.37299	3.20104
metab_408	3.26219	3.247	3.29163	3.51759	3.34551	3.40994	3.42738	3.38435
metab_409	2.75905	2.64778	2.81053	2.72357	4.45415	4.52032	4.4173	4.33016
metab_410	2.03844	2.09757	1.97785	1.95971	2.15716	2.04981	2.06627	2.54292
metab_411	3.85416	3.6134	3.78172	3.58225	3.89025	3.80742	3.83017	4.09911
metab_412	3.21607	3.19892	3.34403	3.52996	3.65978	3.66213	3.66752	3.68684
metab_413	2.70779	2.81688	2.7019	3.00661	3.85151	3.24284	3.32883	4.45309
metab_414	3.26257	3.34616	3.28314	3.31955	3.51471	3.57831	3.53201	3.55043
metab_415	0.728111	1.09745	0.719707	1.42254	2.24543	2.58055	2.31291	2.12083
metab_416	3.42633	3.34924	3.5557	3.64717	3.96343	3.97429	4.01419	3.95988
metab_417	2.75428	2.55657	2.68202	2.66669	3.00896	2.94235	2.96811	3.16445
metab_418	3.44301	3.46132	3.41659	3.45501	3.49656	3.54123	3.50243	3.44988
metab_419	1.88863	1.86434	1.8784	1.88378	2.32535	2.23903	2.25745	2.98677
metab_421	3.43099	3.35134	3.50543	3.55125	4.00896	4.06804	3.95601	3.95525
metab_422	1.88937	1.45047	1.7299	1.70132	2.89949	3.09615	2.85776	2.7493
metab_423	2.20269	2.04785	1.92823	2.07952	2.32242	2.60291	2.31011	2.32923
metab_424	3.09246	3.07613	3.09381	3.0514	3.07993	3.18257	3.15898	3.20936
metab_425	3.37087	3.38074	3.39011	3.41208	3.73872	3.78368	3.68091	3.65621
metab_426	1.81591	1.88658	1.9996	2.27874	2.50151	2.88294	2.66023	2.36965
metab_427	1.88375	1.78079	2.03418	2.01127	2.29846	2.63631	2.2952	2.29255
metab_428	2.52412	2.41086	2.62459	2.69455	3.18948	3.32404	3.11879	3.08595
metab_429	2.40466	2.25593	2.40457	2.40273	3.46769	3.52967	3.32063	3.22997
metab_430	3.46366	3.45366	3.36555	3.64976	3.50692	3.74542	3.48703	3.4088
metab_431	3.21712	3.14086	3.18709	3.12804	3.25255	3.36208	3.26059	3.19531
metab_432	4.13877	1.31562	4.11855	3.95413	3.09371	2.96171	2.91642	2.86596
metab_433	2.68137	2.34656	2.50694	2.74593	2.63992	3.05626	2.78833	2.52139
metab_434	3.24076	2.58914	3.18252	2.53774	2.69554	2.76317	2.55498	2.67894
metab_435	1.41913	1.34447	1.00689	1.01285	2.61464	2.42669	2.08981	0.813311
metab_436	2.6332	2.43952	2.59327	2.51663	2.65505	2.85322	2.81654	2.2721
metab_437	2.84417	2.71825	3.08435	3.20797	3.38337	3.37662	3.37541	3.3692
metab_438	2.77613	2.72808	3.06039	3.17294	3.53979	3.56722	3.50594	3.53849
metab_439	1.15746	0.5008	1.30116	0.514378	2.0665	1.5218	1.82097	2.6472
metab_440	2.57153	2.66149	2.88084	2.95265	3.41462	3.52851	3.38833	3.35653
metab_441	5.93521	5.9359	5.92893	5.92055	5.86457	5.76798	5.83363	5.85384
metab_442	2.54284	1.8916	2.46745	1.7788	2.00501	1.86414	1.83403	1.85876
metab_444	2.91698	2.92169	2.90863	3.01044	2.75006	2.49536	2.88341	2.76012
metab_445	2.47321	2.42787	2.77337	2.8421	3.49686	3.59039	3.45852	3.46161
metab_446	0.19177	0.183142	0.1881	1.66025	2.79304	1.49712	1.91407	3.01086
metab_447	2.86348	2.85196	2.89923	2.96946	3.29127	3.31326	3.15921	3.12191
metab_449	2.76083	2.3943	2.67827	2.46492	3.08507	3.22747	3.06969	3.02578
metab_450	1.78719	2.04049	2.2467	2.24907	3.24285	3.43259	3.16302	3.10222
metab_451	2.38128	2.11944	2.16191	2.24234	3.38056	2.97106	2.9492	3.14013
metab_452	3.40068	3.53002	3.36562	3.50739	3.52709	3.65699	3.58446	3.45984
metab_453	0.854559	1.95068	1.28975	0.00911547	3.39007	3.19879	3.39711	3.38003
metab_454	3.18253	3.13849	3.15193	3.21998	3.39779	3.42647	3.36639	3.3932
metab_455	3.73986	3.69236	3.68729	3.76432	3.75794	3.80335	3.80266	3.72254
metab_456	2.79445	2.84774	2.8387	2.89214	2.82398	2.91471	2.93316	2.89796
metab_457	3.07386	2.99812	3.05622	3.09058	3.27633	3.33474	3.35355	3.36128
metab_458	2.57465	2.69718	2.60246	2.71359	3.46152	3.52402	3.45482	3.43707
metab_459	3.3918	3.38889	3.42166	3.45226	3.3827	3.4135	3.4931	3.4042
metab_460	4.07308	4.08922	4.07123	4.11066	4.15261	4.13138	4.22625	4.14138
metab_461	2.06366	2.77999	2.52159	2.4633	1.90345	2.25376	2.44952	2.23795
metab_462	2.73515	2.71361	2.83198	2.70817	2.5847	2.72592	2.80307	2.59587
metab_463	3.34885	3.29615	3.29917	3.42247	3.79029	3.52721	3.51623	3.60261
metab_464	4.69853	4.50433	4.44187	4.57813	4.21465	4.8266	4.31637	3.85361
metab_465	3.42257	3.42104	3.38054	3.36546	3.21405	3.45532	3.27251	3.22679
metab_466	2.94301	2.88276	3.02583	2.8773	3.17876	3.16051	3.24948	3.16738
metab_468	3.26989	3.27247	3.29959	3.57851	3.98654	3.76244	3.82061	4.31675
metab_470	4.28618	4.25612	4.29905	4.16673	4.17761	4.15836	4.21221	4.20333
metab_471	4.14546	4.15163	4.12229	4.10142	4.02251	4.07607	4.00571	3.93736
metab_472	3.60439	3.56194	3.58292	3.60943	3.66513	3.65244	3.70092	3.67323
metab_473	3.87674	3.83986	3.85405	3.80007	3.83971	3.84251	3.88309	3.89518
metab_474	2.06616	1.70474	1.76299	1.89528	2.36137	2.43174	2.40857	2.38116
metab_475	3.35585	3.32757	3.34604	3.33759	3.34297	3.3453	3.36124	3.40214
metab_476	2.49036	2.88031	2.44641	2.7193	2.73497	2.77465	2.76057	2.59036
metab_477	3.36787	3.38008	3.38482	3.38562	3.35812	3.32337	3.40939	3.34354
metab_478	2.32473	2.27716	2.27395	2.32691	2.4195	2.40304	2.39057	2.4209
metab_479	3.34369	3.53456	3.34854	3.42758	3.45074	3.51419	3.47669	3.30925
metab_480	4.88538	4.83784	4.73685	4.89061	4.72749	5.18001	4.72239	4.43516
metab_481	2.5332	2.47944	2.61421	2.65923	3.12187	3.0887	3.07724	3.16099
metab_482	3.54403	3.51307	3.52898	3.50197	3.49475	3.46191	3.61773	3.42483
metab_483	3.64012	3.57728	3.62135	3.55043	3.66589	3.65852	3.712	3.70026
metab_484	4.07659	4.01203	4.00894	4.1024	3.74381	3.72615	3.85695	3.59778
metab_485	3.16979	3.10193	3.11719	3.01436	3.1272	3.14704	3.18002	3.1778
metab_486	3.81809	3.7737	3.7977	3.73528	3.8902	3.95032	3.88358	3.88382
metab_487	3.51635	3.41251	3.49744	3.43492	3.49893	3.4499	3.51403	3.52971
metab_488	3.72204	3.64399	3.72187	3.64689	3.68183	3.71317	3.74237	3.75668
metab_489	2.06644	1.93649	2.22028	2.16757	2.24453	2.11439	2.00569	2.33179
metab_490	3.59209	3.53655	3.61109	3.59008	3.97208	3.89724	3.94691	3.98676
metab_491	3.00752	3.26454	2.99331	3.1078	3.01906	3.16129	3.01751	2.83178
metab_492	3.3092	3.24813	3.30769	3.22892	3.19378	3.09176	3.17725	3.23875
metab_493	2.8348	2.75433	2.8106	2.77946	2.64659	2.54849	2.61488	2.71548
metab_494	4.05536	3.99975	4.03762	4.04388	4.01682	4.01769	4.03125	4.08313
metab_495	2.03018	1.86307	2.13441	2.03876	2.59876	2.48092	2.56464	2.63336
metab_496	3.27543	3.167	3.29889	3.24322	3.17473	3.18747	3.21884	3.24032
metab_497	3.62473	3.57406	3.66448	3.58328	3.90038	3.8774	4.05533	4.02413
metab_498	2.60509	2.58733	2.90195	2.83698	2.43403	2.04447	2.42353	1.84668
metab_499	3.80605	3.71296	3.7882	3.7522	3.7157	3.70536	4.00678	3.76679
metab_500	3.47936	3.41222	3.47457	3.49199	3.41569	3.43145	3.51406	3.43227
metab_501	2.68641	2.59047	2.7097	2.61388	2.81135	2.78272	2.8366	2.85456
metab_502	3.27795	3.18687	3.2584	3.24216	3.21674	3.26656	3.26104	3.25921
metab_503	2.4748	2.37737	2.50466	2.44592	2.70176	2.64431	2.76107	2.7803
metab_504	3.73843	3.60906	3.73648	3.67135	3.80416	3.75018	3.8271	3.834
metab_505	2.89878	3.14323	2.92476	3.03918	3.17455	3.25379	3.12601	2.88488
metab_506	3.21601	3.20375	3.18946	3.20061	3.07431	3.08708	3.14427	3.01127
metab_507	3.18462	3.14139	3.20659	3.14727	3.28079	3.26502	3.28441	3.31038
metab_508	4.08994	3.9963	4.07293	4.01862	3.92397	4.03936	4.02387	3.97492
metab_509	3.62177	3.61023	3.59974	3.60897	3.43142	3.5308	3.43836	3.41514
metab_510	3.38684	3.27486	3.36299	3.35993	3.36828	3.3561	3.39338	3.46407
metab_511	3.75199	3.66202	3.72079	3.70101	3.63319	3.67863	3.67987	3.68719
metab_512	3.37966	3.26543	3.35965	3.33642	3.29073	3.24433	3.33748	3.32097
metab_513	2.53308	2.19258	2.53883	2.40814	2.69617	2.54488	2.7135	2.76774
metab_514	3.08273	3.21949	3.06991	3.09332	3.16919	3.26822	3.23572	3.11575
metab_515	2.69908	2.53841	2.67761	2.51754	2.83662	2.73893	2.92874	2.9721
metab_516	2.96415	2.85822	2.95747	2.86375	2.95126	2.92887	2.97392	3.07025
metab_517	3.2529	3.16697	3.21246	3.20628	3.18244	3.18385	3.21612	3.21236
metab_518	3.28718	3.17988	3.16289	3.12292	2.88082	3.06945	2.96983	2.97518
metab_519	4.37679	4.28609	4.35866	4.26549	4.51698	4.42187	4.48891	4.53692
metab_520	2.60922	2.82778	2.69812	2.77299	2.78197	2.91785	2.89408	2.65004
metab_521	3.98926	3.94411	3.95525	3.89778	4.01809	3.961	3.99809	3.984
metab_522	3.08266	2.97341	3.06809	3.00717	2.91038	2.92611	2.99075	3.00153
metab_523	3.94659	3.91698	3.87644	3.89421	3.78036	3.82577	3.73779	3.67816
metab_524	3.32851	3.26397	3.34041	3.32916	3.24693	3.26588	3.2303	3.31916
metab_525	2.73877	2.47409	2.72249	2.60427	2.72433	2.70458	2.80841	2.92
metab_526	3.67289	3.60213	3.66327	3.64729	3.59503	3.56932	3.66408	3.59513
metab_527	2.81447	2.68614	2.77476	2.6779	2.82506	2.84742	2.87984	2.87659
metab_528	2.71789	2.73894	2.72833	2.73902	2.62744	2.69516	2.52396	2.54021
metab_529	3.00841	2.82733	3.00345	2.85964	2.89202	2.80393	2.91308	3.01903
metab_530	3.62434	3.62634	3.60413	3.66675	3.60245	3.62604	3.68556	3.52182
metab_531	3.71815	3.56355	3.77321	3.60706	3.76534	3.66218	3.81788	3.86183
metab_532	2.62141	2.53972	2.69086	2.77207	3.4993	3.49596	3.40022	3.27699
metab_533	2.90557	2.69846	2.90542	2.70066	2.84262	2.79469	2.91107	2.97216
metab_534	3.93873	3.95711	3.94443	3.95891	3.92458	3.94512	3.88911	3.84935
metab_535	3.0429	3.18463	3.03862	3.11762	3.14395	3.23687	3.16602	3.01331
metab_536	3.15532	2.85902	3.08998	3.035	3.19097	3.05083	3.22592	3.40411
metab_537	3.36812	3.26263	3.34714	3.21182	3.28713	3.33292	3.32987	3.26053
metab_538	3.02802	2.97631	3.04042	2.93437	2.84982	2.76083	2.86913	2.93582
metab_539	4.31131	4.0772	4.33554	4.17918	4.38794	4.27746	4.47415	4.54456
metab_540	2.87749	2.8034	2.85036	2.76715	2.86611	2.871	2.88499	2.94611
metab_541	3.39723	3.27801	3.36292	3.2939	3.37913	3.30648	3.3697	3.40861
metab_542	2.31508	2.34521	2.40942	2.25219	2.41268	2.29024	2.41857	2.5496
metab_543	4.10786	4.11834	4.08978	4.15904	4.04963	4.13058	4.06257	4.01595
metab_544	3.55806	3.5184	3.54035	3.54097	3.52948	3.5461	3.54025	3.55684
metab_545	3.94198	3.87415	3.9321	3.89249	3.9933	3.99099	4.01521	4.01038
metab_546	2.33827	2.26547	2.40431	2.35141	2.9588	2.8645	2.92302	2.98379
metab_547	4.0468	4.01579	4.03879	4.03873	4.03884	4.09352	4.05372	4.0905
metab_548	4.03385	3.96754	3.93692	3.86541	3.90837	3.9829	3.97053	4.01406
metab_549	3.51383	3.52501	3.4376	3.50285	3.43924	3.54356	3.4744	3.41074
metab_550	3.74958	3.67865	3.72783	3.65552	3.70669	3.6888	3.7379	3.75856
metab_551	3.3015	3.33417	3.27645	3.30123	3.28407	3.31978	3.27218	3.24859
metab_552	2.9874	2.97902	3.00413	2.98295	3.15462	3.13121	3.15389	3.11583
metab_555	4.07987	4.08043	4.03982	4.06724	3.93461	3.9994	3.92323	3.86896
metab_556	3.11639	3.10946	3.15123	3.12601	3.34437	3.34233	3.28151	3.29154
metab_557	3.92601	3.86134	3.90744	3.81264	3.91614	3.90748	3.95052	3.94867
metab_558	2.43141	2.51515	2.36084	2.39519	2.38308	2.33744	2.43017	2.31883
metab_559	2.68271	2.62512	2.74703	2.68042	2.75048	2.70998	2.80905	2.93006
metab_560	3.74883	3.63981	3.75092	3.66365	3.82328	3.80858	3.83529	3.85804
metab_561	4.24031	4.22866	4.20796	4.21104	4.09846	4.18875	4.13006	4.06527
metab_562	3.32893	3.32796	3.32035	3.31074	3.18351	3.2615	3.20571	3.1466
metab_563	4.39752	4.38851	4.3613	4.369	4.25601	4.34704	4.28387	4.22414
metab_564	4.22664	4.22243	4.19218	4.19444	4.07651	4.16901	4.10534	4.04284
metab_565	3.42394	3.31503	3.33634	3.38088	3.40378	3.39735	3.52708	3.45333
metab_566	3.4206	3.36291	3.41137	3.44487	3.47945	3.46806	3.51393	3.47016
metab_567	2.50008	2.03922	2.49204	2.26801	2.69147	2.64593	2.67474	2.61164
metab_568	3.76912	3.78888	3.75047	3.79761	3.69563	3.72312	3.83211	3.65475
metab_569	2.97519	2.99081	2.92308	2.96935	2.83974	2.86295	2.87182	2.80185
metab_570	2.61006	2.56221	2.70439	2.78162	2.43904	2.4421	2.48826	2.41327
metab_571	2.46965	2.33677	2.40696	2.50222	2.27708	2.42669	2.36342	2.35708
metab_572	2.87644	2.82278	2.8319	2.87468	2.69804	2.76752	2.71136	2.66812
metab_573	2.9218	2.83411	2.82913	2.83548	2.73367	2.76906	2.73608	2.75019
metab_574	2.84161	2.82113	2.82207	2.84745	2.66395	2.92244	2.66086	2.69793
metab_575	3.71309	3.68075	3.65992	3.67897	3.57874	3.63731	3.59201	3.56555
metab_576	2.72941	2.72264	2.69351	2.70087	2.60594	2.61907	2.62828	2.54696
metab_577	2.51695	2.52443	2.4689	2.46879	2.40198	2.40793	2.38275	2.35131
metab_578	2.61149	2.57635	2.50089	2.56824	2.43732	2.52393	2.49724	2.48458
metab_579	2.61203	2.65694	2.63134	2.56572	2.46297	2.54744	2.4698	2.44714
metab_580	2.99513	2.98122	2.9441	2.98492	2.87453	2.94091	2.86464	2.80658
metab_581	3.89785	3.90289	3.86941	3.87817	3.77488	3.84653	3.78364	3.73414
metab_582	2.96871	3.04157	2.97302	2.902	3.12676	3.11965	3.13783	3.10355
metab_583	3.01087	2.97958	3.03907	3.07933	3.17883	3.18296	3.20761	3.11459
metab_584	3.00163	2.94237	2.9545	2.92689	3.07224	3.15601	3.1269	2.96205
metab_585	3.07159	3.0615	3.08195	3.07366	3.26306	3.29415	3.31989	3.28176
metab_586	2.96636	2.94508	3.0293	3.01049	2.95651	2.86733	3.01131	2.99293
metab_587	3.56599	3.49972	3.50255	3.53853	3.59159	3.68528	3.64089	3.56499
metab_588	2.62521	2.49798	2.55825	2.57284	2.6502	2.73003	2.75091	2.66425
metab_589	3.70992	3.72572	3.68733	3.7319	3.55735	3.62128	3.57224	3.5209
metab_590	3.31085	3.2482	3.20258	3.25599	3.31612	3.41044	3.41082	3.18861
metab_591	2.22406	2.08203	2.54528	2.19055	2.59698	2.70151	2.59616	2.49095
metab_592	3.50977	3.46637	3.4154	3.47649	3.69977	3.7609	3.76612	3.69122
metab_593	3.40003	3.41314	3.40082	3.38758	3.27321	3.3795	3.36454	3.38028
metab_594	2.63817	2.59331	2.57451	2.61307	3.51017	3.62922	3.38345	3.3615
metab_595	6.18861	6.20038	6.17774	6.18234	6.09764	6.10375	6.09826	6.06907
metab_596	2.33767	2.1463	2.33544	2.35737	2.44039	2.57568	2.52663	1.64005
metab_597	3.44372	3.22305	3.48657	3.53094	3.28093	3.63565	3.29814	3.21642
metab_600	2.20009	2.01881	2.30054	2.15192	2.41581	2.5205	2.54668	1.86018
metab_601	2.79683	2.65909	2.76452	2.6717	2.88398	3.01239	3.06292	2.10561
metab_603	2.15434	2.12944	2.15637	2.13748	2.30723	2.45552	2.31297	2.46464
metab_604	2.4054	2.42716	2.48909	2.36783	2.35464	2.31317	2.38446	2.12658
metab_605	2.98951	2.90463	2.88021	2.97959	2.97347	3.13683	3.22289	2.55421
metab_606	2.14431	2.12574	2.21454	2.31452	2.85213	2.69712	2.64729	3.17477
metab_607	2.56588	2.69051	2.52365	2.46859	2.71284	2.80891	2.75229	2.55671
metab_608	4.18957	4.26625	4.18012	4.22411	4.24424	4.35368	4.29431	4.08934
metab_609	3.44385	3.51343	3.39837	3.44779	3.53641	3.65822	3.61467	3.37243
metab_610	3.44061	3.57611	3.52167	3.48875	3.6586	3.36952	3.86288	3.49252
metab_611	1.19009	1.48926	0.575804	1.74285	2.03851	1.06201	1.35701	3.02612
metab_614	2.37379	2.19111	2.1071	2.33451	2.09913	2.59717	2.56192	2.24807
metab_615	3.01734	2.86233	2.93793	2.9687	3.10476	3.51592	3.36031	3.31045
metab_616	2.68523	2.68007	2.70792	2.74048	3.07943	3.10374	2.94252	2.98455
metab_617	1.61872	0.891522	0.903972	1.81149	3.76323	3.83098	3.7048	3.66764
metab_618	3.72321	3.68492	3.70294	3.72811	3.65407	3.74024	3.6612	3.59071
metab_619	1.21815	1.64933	1.66921	1.62833	2.99085	3.03846	2.93637	2.81635
metab_620	3.5e-05	0.808405	3.42e-05	1.11217	2.95793	2.47837	2.45302	2.57506
metab_621	4.88221	4.93727	4.95203	4.9034	4.89517	4.64015	4.82408	4.88532
metab_622	3.49593	3.56636	3.48511	3.56357	3.95234	3.93004	3.92031	4.06884
metab_623	2.58722	2.65089	2.54571	2.65113	2.79028	2.91759	2.78286	2.58124
metab_624	3.64272	3.61932	3.75471	3.78568	4.13212	4.16392	4.10325	4.15924
metab_625	2.92174	2.78739	3.33703	2.90727	2.89576	2.76861	2.8705	2.78324
metab_626	3.03826	3.08381	3.15753	3.48264	3.02387	2.8843	3.01942	3.14731
metab_627	4.56415	4.62444	4.61662	4.57471	4.55926	4.23853	4.5227	4.5842
metab_628	3.17581	3.15849	3.16827	3.24193	3.756	3.85343	3.72669	3.66247
metab_629	3.82688	3.71749	3.6707	3.78074	3.70381	3.696	3.70947	3.66461
metab_630	3.65061	3.67379	3.57738	3.74349	4.03108	3.89481	3.82566	3.7584
metab_631	4.11717	4.17934	4.11079	4.09112	4.05022	3.92563	4.08661	4.07564
metab_632	3.53254	3.48189	3.53019	3.60925	3.81394	3.68812	3.61962	3.70215
metab_633	3.40501	3.40854	3.48482	3.61303	3.57532	3.63103	3.66297	3.62752
metab_634	3.24463	3.16173	3.20422	3.26892	3.07556	3.10338	3.05586	2.95395
metab_635	3.29872	3.24925	3.30303	3.34574	3.17421	3.08284	3.12473	3.05403
metab_636	3.12393	3.14795	3.11448	3.18037	3.19735	3.30154	3.22679	3.12903
metab_637	2.85464	2.77851	2.99353	3.58797	2.78116	2.9769	2.89368	2.83744
metab_638	1.89973	1.96266	1.4673	1.50748	2.76343	2.50027	2.53337	2.17375
metab_639	3.64753	3.72978	3.65491	3.69142	4.01252	4.02297	3.99803	4.03732
metab_640	1.75799	1.62591	1.76573	1.8353	1.68767	1.89765	1.84639	1.70856
metab_641	2.06602	2.04237	1.98519	2.06577	2.16264	2.41503	2.2916	2.2278
metab_642	3.75478	3.74311	3.73416	3.81591	3.34379	3.35175	3.22743	3.20971
metab_643	2.3656	2.30928	2.37769	2.46737	3.65275	3.36627	3.32328	3.15999
metab_644	2.66417	2.77665	2.77531	2.79634	2.81839	2.87101	2.86921	2.95058
metab_645	3.11336	3.02894	3.12109	3.17561	2.95187	2.94735	2.92861	2.85334
metab_646	3.20463	3.21066	3.15975	3.24526	3.33404	3.28832	3.34814	3.38647
metab_647	2.78968	2.87864	2.62293	2.9896	2.73554	2.95307	2.82416	2.84804
metab_648	3.20747	3.10866	3.23734	3.20848	3.47628	3.42211	3.40854	3.38821
metab_649	3.54858	3.57176	3.57615	3.60681	3.66585	3.69198	3.78749	3.58731
metab_650	3.90417	3.90081	3.85757	4.00177	3.91364	4.03299	3.95029	3.89048
metab_651	2.25012	2.35073	2.2415	2.33017	2.82936	2.54815	2.56797	3.32712
metab_652	3.70957	3.71425	3.67528	3.71911	3.61551	3.72849	3.69281	3.63829
metab_653	2.27011	2.24297	2.2594	2.38075	2.32546	2.48915	2.35069	2.26957
metab_654	3.72598	3.67011	3.68568	3.69601	3.95283	3.91151	3.89205	3.86245
metab_655	2.3522	2.33628	2.15417	2.38754	2.42352	2.40729	2.56412	2.48109
metab_656	3.03957	3.05245	3.07339	3.10137	3.05082	2.92677	2.98725	3.02398
metab_657	2.65388	2.7068	2.58945	2.67196	2.50293	2.59237	2.63186	2.621
metab_658	3.76309	3.76075	3.76869	3.69617	3.74743	3.80322	3.74868	3.58731
metab_659	3.37636	3.34251	3.37725	3.4216	3.76957	3.74409	3.67464	3.59151
metab_660	4.32145	4.33118	4.26873	4.31823	4.46678	4.51056	4.47505	4.40523
metab_661	3.40145	3.37645	3.38463	3.36702	3.47195	3.28976	3.41028	3.72098
metab_662	3.17748	3.16783	3.18709	3.24455	3.83076	3.81403	3.72273	3.64811
metab_663	3.96438	3.93426	3.94704	3.93647	3.89811	3.92074	3.88228	3.96343
metab_665	2.79642	2.8223	2.66326	2.86302	3.05756	3.16467	2.99259	2.94259
metab_666	3.48631	3.48022	3.47027	3.52594	3.34222	3.4147	3.3443	3.32002
metab_667	3.19838	3.30911	3.14056	3.16415	4.00029	3.62087	3.75031	3.63169
metab_668	4.1686	4.23421	4.17535	4.43224	4.1772	4.35991	4.18381	4.16817
metab_669	3.36837	3.27695	3.33543	3.18236	3.62509	3.35776	3.62098	3.42562
metab_670	2.14472	1.91578	1.99654	2.19873	2.3846	2.49109	2.38369	2.40706
metab_671	2.10243	2.15032	1.98194	2.07127	2.59946	2.59393	2.48396	2.97573
metab_672	2.4908	2.57804	2.64525	2.50788	2.78643	2.83625	2.905	2.65103
metab_673	2.20895	2.20833	2.16476	2.21313	3.17948	3.19324	3.14383	3.00426
metab_674	2.65712	2.59692	2.65121	2.54355	3.18707	2.94679	3.00193	2.84506
metab_675	2.34179	2.63772	2.41349	2.35412	2.87591	2.93336	2.94729	2.7383
metab_676	3.90913	3.94608	3.98723	3.89367	3.96175	3.75824	3.91637	3.967
metab_677	2.61951	2.65092	2.69449	2.70789	2.5669	2.45294	2.60157	2.56572
metab_678	2.03353	1.87183	1.62238	1.88631	2.27448	2.39472	2.19899	2.20398
metab_679	3.71512	3.75163	3.72296	3.71997	3.68162	3.71043	3.67904	3.64393
metab_680	1.64181	1.4298	1.39166	1.6201	2.25166	2.17725	2.06463	2.17846
metab_681	2.2274	2.14664	2.20299	2.14159	2.35586	2.36762	2.337	2.30947
metab_682	1.57709	1.49187	1.45911	1.13154	2.30202	2.30044	2.28205	2.19031
metab_683	2.01915	2.12167	2.24123	2.29005	2.77278	2.75497	2.59543	2.56487
metab_684	1.99288	2.03152	1.84548	2.02801	2.30911	2.30814	2.2379	2.2022
metab_685	2.26292	2.20195	2.14452	2.10877	2.41898	2.46957	2.47268	2.32356
metab_686	1.66943	0.611875	1.54617	2.18064	2.72843	2.6887	2.64018	3.05595
metab_687	2.63527	2.58239	2.53007	2.5729	2.65453	2.58305	2.9989	2.61233
metab_688	2.56585	2.642	2.47359	2.85024	2.71095	2.82493	2.67048	2.5903
metab_689	2.53731	2.40279	2.34335	2.52683	1.88318	3.06238	2.29037	1.49788
metab_690	3.13126	3.21377	3.1432	3.15699	3.09493	2.96274	2.95166	2.87366
metab_691	2.88633	2.90642	2.9098	2.90649	2.97736	3.0713	3.00238	2.93412
metab_692	2.6585	2.70714	2.73775	2.73061	2.89458	2.83652	3.13181	2.81831
metab_693	2.13364	2.44282	2.31485	2.40289	2.72139	2.81035	2.74094	2.58202
metab_694	3.00857	3.04351	3.01897	3.20756	3.41883	3.49735	3.38469	3.30226
metab_695	2.07752	2.04302	2.58055	2.383	1.69864	1.49873	2.04499	1.62766
metab_696	1.98291	1.88	1.72828	2.44476	2.18075	2.10711	1.88873	2.03796
metab_698	2.44479	2.44334	2.37794	2.42428	2.73309	2.77067	2.66598	2.50077
metab_699	0.490113	0.277652	0.0015332	0.00155252	0.664835	0.288245	0.00190195	0.00208496
metab_700	2.36153	2.32172	2.26841	2.42246	2.51812	2.54691	2.52449	2.28582
metab_701	3.26655	3.30578	3.24831	3.3124	3.26772	3.39333	3.27691	3.13968
metab_702	2.58189	2.54676	2.53453	2.55032	2.96484	3.09839	2.92748	2.86249
metab_703	3.01798	3.00712	2.99143	2.96586	3.05926	3.09097	3.03758	2.9617
metab_704	2.87689	2.94877	2.88314	2.88883	3.05377	3.17714	3.07691	2.9637
metab_705	3.26085	3.30313	3.24646	3.28035	3.18579	3.274	3.19062	3.14318
metab_706	2.80838	2.78818	2.74909	2.8081	3.09291	3.15978	3.06343	2.9796
metab_707	1.54336	1.41713	1.30636	0.839213	1.96991	1.82027	1.83693	1.77347
metab_708	0.0817984	0.832711	0.123193	0.0809588	1.33982	1.26377	1.25495	1.41848
metab_709	1.29332	1.37277	1.9338	2.19824	1.41335	1.45556	0.0641411	0.917602
metab_710	2.3806	2.46962	2.77231	2.73898	2.52119	2.46669	2.37741	2.5705
metab_711	2.83167	2.8851	2.89843	2.81349	2.83871	2.44723	2.58116	2.51474
metab_712	2.20261	2.12565	2.17112	2.14497	2.35615	2.41744	2.4097	2.2957
metab_713	2.50214	2.66958	2.46523	2.77494	2.51146	2.66586	2.40788	2.58862
metab_714	3.03209	3.01546	2.94546	2.80354	3.01679	3.13176	2.90801	3.06215
metab_715	1.77991	2.10245	1.89574	1.94907	2.06357	2.06375	1.99784	2.03143
metab_716	3.70762	3.74129	3.70479	3.74978	3.80505	3.93286	3.8556	3.72875
metab_717	4.09736	4.09209	4.07986	4.10913	3.9861	4.05421	4.0061	3.98977
metab_718	2.81535	2.90008	2.84245	2.74751	2.82723	2.70977	2.79719	2.82878
metab_719	3.18603	3.21433	3.18195	3.2865	3.40219	3.52438	3.45971	3.34413
metab_720	2.90357	2.9174	2.88866	2.94186	2.81168	2.86376	2.84044	2.76797
metab_721	1.40786	1.66815	1.36201	1.51615	1.80978	1.71905	1.90693	1.7381
metab_722	2.16365	2.13053	2.16812	2.10964	2.229	2.32448	2.22537	2.19265
metab_723	1.72859	1.72389	1.84241	1.79277	3.02173	3.14208	3.0222	2.89484
metab_724	2.33741	2.73207	2.27735	2.39931	2.38591	2.45603	2.3611	2.34143
metab_725	1.87809	1.8313	1.75801	2.1017	2.56325	2.94356	2.20224	2.35681
metab_726	2.64351	2.09695	1.73343	2.26959	2.26619	2.68124	2.63988	2.21357
metab_727	2.64342	2.60564	2.62839	2.70686	2.49799	2.49395	2.52082	2.42616
metab_728	2.01645	1.91947	1.8007	1.97115	2.27478	2.29678	2.27815	2.28517
metab_729	2.52666	2.62778	2.43883	2.68722	2.66724	2.71434	2.65534	2.60823
metab_730	2.27104	2.22361	2.20815	2.35146	2.34829	2.41206	2.34917	2.26972
metab_731	2.85479	2.90576	2.86428	2.8559	3.01088	3.14584	3.03755	2.96183
metab_732	2.75779	2.77322	2.74888	2.72916	2.93018	3.03599	2.98786	2.86537
metab_733	1.77711	2.01757	1.76984	1.97073	2.25835	2.35606	2.2961	2.24041
metab_734	2.32411	2.28382	2.32358	2.3621	2.48557	2.66641	2.55752	2.46534
metab_735	3.12162	3.1088	3.12003	3.2152	3.05763	2.93971	3.01707	3.01206
metab_736	1.69381	1.74277	1.84093	1.65838	1.46901	1.7236	1.75364	1.38873
metab_737	2.51217	2.55852	2.51037	2.59392	2.6038	2.68648	2.61396	2.54743
metab_738	3.04367	3.20492	3.07769	3.33283	3.26098	3.22193	3.22272	3.29108
metab_739	2.79475	2.71747	2.79307	2.89156	2.73987	3.03246	2.47742	2.46801
metab_740	1.80174	1.73888	1.76588	1.7813	1.97541	2.02177	2.09807	1.93652
metab_741	0.488816	0.472342	0.481845	0.485503	1.32557	2.99702	2.11505	1.75463
metab_742	0.520755	0.503709	0.513544	0.517329	0.564403	0.598916	0.580673	0.546688
metab_743	0.537958	1.1557	1.19713	0.431415	0.16435	0.179638	0.171473	1.81235
metab_744	2.46512	2.41723	2.40902	2.43568	2.48505	2.69916	2.50695	2.41843
metab_745	2.32227	2.09	1.83579	1.85542	0.520586	0.210103	0.200847	0.184114
metab_746	1.61192	1.80198	1.78838	2.03028	2.66928	3.28511	1.72165	1.71522
metab_747	0.826212	1.50158	1.27995	1.43162	2.01543	1.89936	1.95768	1.71568
metab_748	2.24635	2.14803	2.27193	2.38545	2.39075	2.67763	2.4977	2.34081
metab_749	1.55531	1.63077	1.4687	1.55637	3.1032	1.97056	1.75952	1.67362
metab_750	2.9643	2.91307	2.90413	2.9201	2.85245	3.02608	2.91631	2.81512
metab_751	2.19151	2.41943	1.99184	2.09226	2.32177	2.32832	2.0225	2.2775
metab_752	1.30769	1.21647	1.41335	1.35902	0.616496	0.879421	1.16611	0.819243
metab_753	1.477	1.56222	1.57877	1.50804	2.09183	2.25834	2.31997	1.93707
metab_754	2.28847	2.59303	1.31769	0.195773	0.669025	0.240206	1.17145	0.303907
metab_755	1.99646	1.71824	1.63988	1.60924	2.29679	2.27786	1.88104	1.6038
metab_756	1.97343	2.03818	1.88516	1.94133	2.22555	2.33563	2.096	2.10235
metab_757	2.66364	2.54893	2.50916	2.41152	2.88039	2.9278	2.84058	2.78849
metab_758	2.3818	2.35117	2.44705	2.40522	2.56119	2.61383	2.51518	2.51119
metab_759	2.74743	2.69888	2.68096	2.74766	3.00606	3.07125	2.95532	2.95753
metab_760	2.95046	2.85374	2.75019	2.68105	3.17514	3.19647	3.15426	3.10359
metab_761	2.48445	2.34229	2.51839	2.42522	2.06688	2.10919	2.16015	2.31586
metab_762	2.41525	2.34996	2.38156	2.28318	2.31985	2.42874	2.32776	2.22497
metab_763	2.55286	2.57362	2.60401	2.62201	2.67684	2.799	2.68932	2.57611
metab_764	1.97645	1.85372	1.91106	2.03794	1.93678	2.08982	1.94309	1.90334
metab_765	3.62835	3.6448	3.64428	3.61876	3.65353	3.69943	3.66793	3.6084
metab_766	3.65473	3.66135	3.66841	3.67098	3.63272	3.70672	3.64871	3.60898
metab_767	2.194	2.10882	2.13594	2.11438	2.31996	2.42157	2.39545	2.37989
metab_768	2.11139	2.33896	2.03648	2.2159	2.37125	2.56326	2.54429	2.5382
metab_769	2.93636	2.90127	2.91824	2.85948	2.99383	2.98226	2.98466	2.93949
metab_770	2.50372	2.51488	2.41808	2.45523	2.5404	2.65739	2.5973	2.61764
metab_771	2.05107	2.06602	2.02182	1.93002	1.9695	2.04385	1.94905	1.87342
metab_772	2.69724	2.71763	2.67153	2.71778	3.04607	3.17402	3.11994	3.14813
metab_773	2.51915	2.61168	2.49812	2.51023	2.80577	2.89143	2.86447	2.94558
metab_774	2.08713	2.27429	2.06176	2.0611	2.10617	2.12925	2.0536	1.90907
metab_775	3.27502	3.32305	3.24945	3.24206	3.36734	3.46759	3.41019	3.38407
metab_776	2.33465	2.01935	2.24283	2.22626	2.32867	2.41673	2.30157	2.21858
metab_777	2.92139	2.93617	2.94207	2.90856	2.90304	2.94632	2.93471	2.8426
metab_778	3.08028	3.0757	3.04117	3.08951	3.01971	3.11169	3.06845	2.99211
metab_779	2.44096	2.45366	2.3967	2.41257	2.38233	2.4538	2.39728	2.30868
metab_780	2.06911	2.16223	2.05016	2.08282	2.13091	2.16203	2.12759	1.9868
metab_781	2.22954	2.23586	2.18485	2.20056	2.08961	2.18795	2.10969	2.06178
metab_782	2.46053	2.49284	2.40337	2.4587	2.42815	2.49246	2.40415	2.35373
metab_785	3.15209	3.2067	3.10189	3.22013	3.07571	3.19566	3.12211	3.04538
metab_786	1.63833	1.61881	1.61441	1.52883	1.59477	1.67323	1.5523	1.54584
metab_787	2.94416	2.95566	2.93452	2.98367	2.92972	3.00691	2.92233	2.88031
metab_788	2.95615	3.00718	2.95732	3.02279	2.85554	2.98066	2.94316	2.83498
metab_790	1.83192	1.97273	1.66064	1.92952	2.14904	1.98769	2.00489	1.9093
metab_791	2.10775	2.22569	2.09307	2.0303	2.01598	2.071	1.97304	1.92312
metab_792	1.76913	1.74304	1.65758	1.69918	1.72249	1.77738	1.77771	1.69549
metab_795	2.27769	2.22985	2.26382	2.22457	2.39613	2.33913	2.31447	2.28966
metab_796	1.9857	2.03353	1.84321	1.95251	1.8405	1.92009	1.81011	1.78252
metab_797	1.88047	1.82657	1.94554	1.80864	1.81342	1.82986	1.74636	1.64464
metab_798	2.03569	2.17639	1.9841	2.16038	2.02303	2.11002	2.09832	2.0031
metab_799	2.45338	2.55923	2.39207	2.42347	2.44121	2.42585	2.44751	2.25792
metab_800	2.23007	2.30618	2.19777	2.2138	2.10792	2.19833	2.10816	2.02512
metab_802	1.81244	1.69701	1.70294	1.78551	1.73072	1.77879	1.75059	1.64581
metab_803	2.26257	2.3382	2.19919	2.31774	2.38192	2.34368	2.48375	2.31164
metab_804	2.44634	2.45115	2.35842	2.31261	2.46107	2.43131	2.45118	2.44888
metab_805	2.32646	2.33348	2.19628	2.1672	2.24067	2.2494	2.14104	2.11609
metab_806	2.72362	2.70297	2.68932	2.73522	2.82512	2.80077	2.80399	2.69283
metab_807	1.9798	2.03045	1.95175	1.97806	2.00082	2.08669	2.00752	1.95021
metab_808	2.11214	2.09893	2.03679	2.07977	2.05167	2.16915	2.11242	2.07009
metab_809	2.1194	2.17117	2.07591	2.17248	2.04973	2.03564	2.03329	1.91792
metab_810	2.10285	2.11856	1.78828	1.99808	1.9976	1.85765	1.87496	2.08042
metab_811	2.51987	2.55711	2.46525	2.53877	2.39403	2.45907	2.3659	2.30059
metab_812	2.44532	2.50426	2.46966	2.49282	2.41729	2.5438	2.52587	2.45645
metab_813	3.0234	3.03616	3.03507	3.04655	3.04103	3.06152	3.05391	2.9996
metab_814	2.95911	2.95546	2.95106	2.99383	2.99067	3.07539	3.00995	2.93598
metab_815	2.28214	2.39407	2.3044	2.30407	2.28232	2.36166	2.23966	2.20374
metab_816	2.92014	2.92529	2.92211	2.9211	2.87125	2.93981	2.92513	2.87367
metab_817	3.00915	2.99072	2.96477	2.98637	2.9705	3.0241	2.98635	2.95902
metab_818	3.25448	3.25877	3.22188	3.25344	3.26567	3.34268	3.30623	3.23684
metab_819	2.66939	2.79087	2.62613	2.66335	2.66767	2.75995	2.70889	2.69039
metab_820	3.60847	3.61941	3.61311	3.60871	3.63334	3.67089	3.63773	3.58448
metab_821	2.84662	2.84704	2.84416	2.81722	2.80925	2.90509	2.83684	2.80097
metab_822	2.58652	2.60319	2.57945	2.56248	2.5637	2.63671	2.56621	2.54146
metab_823	2.73165	2.83495	2.72818	2.67779	2.76141	2.80352	2.77493	2.68919
metab_824	3.45781	3.46244	3.41478	3.4605	3.46211	3.5465	3.51955	3.43286
metab_825	3.67395	3.66935	3.63929	3.65651	3.65946	3.70952	3.68644	3.6126
metab_827	2.87098	2.89451	2.87952	2.84601	2.86998	2.94859	2.90417	2.83977
metab_828	3.60538	3.5997	3.58666	3.58229	3.55358	3.61893	3.57264	3.5388
metab_829	2.66572	2.63485	2.49268	2.49943	2.6394	2.61862	2.74206	2.51516
metab_830	2.67533	2.63949	2.64749	2.64649	2.76373	2.78565	2.74125	2.7315
metab_831	2.37034	2.31519	2.44786	2.4472	2.34459	2.40018	2.41976	2.41563
metab_832	2.23174	2.09757	2.31285	2.23646	2.18287	2.3414	2.16268	2.25061
metab_833	2.70064	2.59832	2.58837	2.56256	2.58063	2.61092	2.64398	2.56233
metab_836	2.04247	2.02092	1.99672	2.03439	1.9338	1.91412	2.02421	1.89965
metab_837	3.07254	2.98201	2.98839	3.05076	0.982069	1.45223	1.38466	1.37325
metab_838	2.20828	2.21948	2.21285	2.25844	2.50787	2.61275	2.58426	2.46437
metab_841	1.80279	1.90663	1.86837	1.8934	1.98479	2.04998	1.94771	1.91367
metab_842	2.39664	2.3361	2.33313	2.43065	0.449093	1.12816	0.463538	0.708888
metab_844	3.39145	3.37432	3.34107	3.34121	3.28422	3.29998	3.26865	3.18131
metab_845	3.30734	3.32375	3.24991	3.29788	3.14921	3.20303	3.1801	3.08779
metab_846	0.485827	0.469409	0.478878	0.482525	1.88451	1.92849	1.91001	2.01545
metab_848	2.47249	2.58502	2.49132	2.52406	2.94566	2.99266	2.95891	2.84234
metab_849	2.40347	2.5118	2.46461	2.52328	1.629	1.71556	1.827	1.74704
metab_850	1.99704	2.14073	2.07749	2.17262	1.97558	2.09245	2.06003	1.88131
metab_851	2.39614	2.42836	2.36338	2.43188	2.67265	2.80984	2.67406	2.55748
metab_853	0.788608	0.795402	0.701026	0.690106	1.5487	1.77697	1.76747	1.65181
metab_854	2.42051	2.52391	2.4091	2.3739	2.07561	1.97812	2.03463	2.01864
metab_855	3.65716	3.65201	3.65863	3.67889	3.36329	3.42303	3.41896	3.3311
metab_856	2.63664	2.66987	2.48165	2.55981	2.60372	2.66924	2.6387	2.49559
metab_857	2.31418	2.19727	2.10805	2.22627	2.16603	2.2049	2.46656	2.31831
metab_858	3.52357	3.47849	3.43241	3.48912	3.14277	3.29638	3.20845	3.11556
metab_859	1.40922	1.7618	1.44229	1.4736	2.37774	2.43558	2.50785	2.34063
metab_860	3.41006	3.45381	3.40619	3.42791	3.26597	3.38054	3.3154	3.20065
metab_861	3.52923	3.52535	3.52524	3.52452	3.53026	3.6038	3.54769	3.47467
metab_862	2.9622	2.99041	2.92047	2.96685	2.73522	2.88298	2.70955	2.69464
metab_863	1.82757	1.97585	1.88166	1.91013	2.80127	2.84417	2.78962	2.7251
metab_865	3.67541	3.66127	3.6588	3.64703	3.4276	3.50252	3.43507	3.44039
metab_866	2.92464	2.86498	2.87344	2.83944	2.82699	2.82673	2.815	2.72069
metab_867	2.7203	2.57486	2.60947	2.58747	2.31867	2.42135	2.44673	2.40929
metab_868	2.8924	2.86528	2.79742	2.85458	2.75086	2.78827	2.77044	2.66734
metab_869	2.2399	2.17273	2.09181	2.11339	2.09151	2.18882	2.15572	1.83826
metab_872	2.2459	3.2165	2.58127	2.35244	2.49192	3.0597	2.16595	3.19416
metab_873	2.01254	1.65059	1.53918	1.54389	1.86245	1.94259	1.91725	1.76867
metab_874	0.558808	1.72256	0.551334	0.715311	0.603957	2.00139	0.852416	2.21366
metab_875	3.70831	3.71331	3.66316	3.66793	3.67713	3.75005	3.70096	3.61782
metab_876	2.6317	2.56835	2.55375	2.69338	2.55875	2.70197	2.61674	2.50319
metab_877	2.00369	2.46434	2.00965	2.20225	1.87982	2.26217	1.70729	2.31592
metab_878	3.04212	3.0182	3.01872	3.02765	2.99174	3.05041	3.0241	2.97927
metab_880	1.83887	1.75227	1.79083	1.85285	1.92943	2.12889	2.24553	2.03158
metab_881	1.56897	1.74267	1.53274	1.69036	1.7995	1.69738	1.86365	1.75874
metab_882	2.43387	2.46129	2.45375	2.40216	1.94298	2.06174	2.06303	1.9324
metab_884	2.62247	2.62358	2.59842	2.54966	2.5884	2.6458	2.65287	2.63382
metab_885	2.24224	2.27359	2.29179	2.17476	2.22898	2.23738	2.27891	2.14733
metab_886	1.95374	2.01503	1.95112	1.76926	2.72839	2.80361	2.80698	2.80596
metab_887	2.57288	2.59589	2.55473	2.58645	2.48093	2.87618	2.47942	2.37955
metab_888	2.16203	2.08454	1.98295	2.10603	2.32339	2.48612	2.49775	2.45188
metab_889	2.44237	2.61709	2.51329	2.44113	2.54568	2.60848	2.61268	2.46984
metab_890	2.57725	2.58759	2.577	2.53734	2.68166	2.62083	2.64854	2.64351
metab_891	2.17171	2.27417	2.14626	2.1798	2.19973	2.3361	2.22741	2.1606
metab_892	2.76743	2.81197	2.75951	2.79157	2.81318	2.84489	2.79493	2.69979
metab_893	2.19756	1.92549	2.15512	2.04544	2.08194	2.2208	2.07268	2.11194
metab_894	1.57611	1.45597	1.68804	1.45844	1.51883	1.65106	1.52918	1.47444
metab_895	2.20117	2.21373	2.19863	2.36986	2.13309	2.25789	2.13576	2.10488
metab_896	2.0988	2.17747	2.11772	2.19249	2.05807	2.12962	2.1311	2.12365
metab_897	2.43965	2.41265	2.29254	2.42482	2.56828	2.63888	2.59007	2.53543
metab_898	4.11607	4.20124	4.16177	4.17073	4.22169	4.18601	4.23	4.24195
metab_900	2.60243	2.76678	2.65534	2.79992	2.94104	2.83233	2.97909	2.98073
metab_902	1.48122	1.65541	1.69726	1.77131	2.01303	2.0259	1.99566	1.94317
metab_903	3.67128	3.73474	3.68856	3.69074	3.77103	3.72851	3.76667	3.77976
metab_905	2.87457	2.73632	2.75246	2.82583	2.84818	2.8756	2.96504	2.91963
metab_906	2.77991	2.82922	2.68559	2.74092	2.55253	2.6486	2.58351	2.65431
metab_907	2.81209	2.80764	2.79475	2.80603	2.67635	2.76169	2.67449	2.66061
metab_908	2.97798	2.9858	2.94928	2.93186	3.11594	3.19482	3.17296	3.06476
metab_909	1.3934	1.32733	1.45405	1.3927	2.05135	2.07584	2.01457	1.94014
metab_910	2.57133	2.53243	2.55186	2.58093	2.69653	2.76504	2.74509	2.63455
metab_911	1.9969	2.02976	2.04956	1.98481	1.97121	2.06028	2.08663	1.98064
metab_912	1.47415	1.38546	1.42879	1.49488	1.68534	1.84558	1.83693	1.70799
metab_913	2.27586	2.50633	2.19506	2.18605	2.22643	2.28958	2.29784	2.21932
metab_914	1.82343	1.78838	1.98614	1.88474	1.89647	1.96416	1.86638	1.84
metab_915	2.06327	2.07896	1.9869	1.88426	2.09227	2.16053	2.16768	2.17718
metab_916	2.90395	2.87915	2.93676	2.89195	3.03302	3.12115	3.06638	3.11215
metab_917	2.13501	2.13516	2.08356	2.14421	2.51431	2.56956	2.50237	2.47851
metab_918	2.4318	2.38164	2.33282	2.28187	2.70993	2.86877	2.69717	2.65438
metab_919	2.44656	2.41676	2.48036	2.43245	2.40525	2.505	2.33485	2.35858
metab_920	2.9316	2.99166	2.89032	2.91555	3.03039	3.06985	2.93223	2.88071
metab_922	2.33735	2.41377	2.39424	2.35825	2.3895	2.39994	2.31428	2.2815
metab_923	1.75056	1.77138	1.90559	1.68798	1.90204	2.06698	1.86639	1.82623
metab_924	1.46037	1.56032	1.45354	1.49828	1.45146	1.63884	1.50353	1.48683
metab_925	2.54762	2.56634	2.5621	2.2998	2.67569	2.63641	2.68857	2.62151
metab_926	1.19968	2.0321	1.30624	1.28876	1.69246	1.4989	1.93373	1.9262
metab_927	1.93984	1.7434	1.66493	1.73265	1.88882	1.90804	1.93545	1.8429
metab_928	1.80379	1.80947	1.69016	1.9321	2.01541	2.03598	2.49524	2.01605
metab_929	2.03595	2.05296	2.0939	1.91409	2.17686	2.36436	2.134	2.22779
metab_930	1.3108	1.26366	1.96508	1.19934	1.64186	1.85456	1.85103	1.76654
metab_931	2.25833	2.19503	1.95968	2.27045	2.57982	2.70327	2.43909	2.3949
metab_932	2.38773	2.30387	2.30758	2.29443	1.91171	1.92836	1.92464	1.77815
metab_933	2.7262	2.78298	2.83058	2.85235	2.71984	2.8427	2.77607	2.71885
metab_934	4.18051	4.16293	4.12092	4.1509	4.2083	4.29098	4.20667	4.21271
metab_935	2.51729	2.85187	2.62802	2.38556	2.50174	2.65973	2.7243	2.5697
metab_936	2.11783	2.20944	1.97209	2.32706	2.23595	2.39364	2.39513	2.28194
metab_938	1.88449	1.58104	1.51073	1.73003	2.62242	2.64627	2.42585	2.36935
metab_939	2.50131	2.43881	2.3342	2.55605	2.6994	2.91014	2.73941	2.71743
metab_940	2.21924	2.14751	2.32384	2.19159	2.24635	2.24007	2.29857	2.15578
metab_942	2.81756	2.7102	2.68095	2.83151	2.92733	3.04563	2.96049	2.93757
metab_943	1.97997	1.83975	1.95935	2.08029	2.30089	2.33333	2.67117	2.22592
metab_944	2.44432	2.40899	2.49028	2.69159	2.56724	2.63224	2.57295	2.46456
metab_945	2.76298	2.69387	2.66859	2.70019	2.92452	3.02959	2.96879	2.84374
metab_946	2.69523	2.73491	2.72952	2.68994	2.74442	2.85315	2.72109	2.62945
metab_947	1.76966	1.61936	1.6705	1.66759	2.16972	2.27099	2.21657	2.1442
metab_948	1.94244	1.93498	1.90493	2.09975	2.11069	2.14284	2.59713	2.05287
metab_949	1.79022	1.70931	1.75062	1.81397	1.76464	1.9285	1.93769	1.74245
metab_950	2.1327	2.23393	2.23802	2.2746	2.27133	2.05179	2.22422	2.3458
metab_951	1.88479	1.88853	1.77464	1.94232	2.15826	2.17032	2.64662	2.12468
metab_952	2.65595	2.61671	2.64567	2.66258	2.69493	2.65002	2.72036	2.80454
metab_953	3.4361	3.43158	3.40796	3.41655	3.30166	3.36782	3.2933	3.28145
metab_954	2.01491	2.01494	1.97173	1.96417	2.15437	2.25906	2.24674	2.16493
metab_955	2.67352	2.68891	2.64605	2.60933	3.21488	3.28926	3.23253	3.13695
metab_956	1.33828	1.60227	0.614287	0.489991	1.27788	1.56941	0.55166	1.43417
metab_957	1.58232	1.50076	1.43823	1.6445	1.75566	1.70338	1.80004	1.77817
metab_958	1.89993	1.91052	1.98457	1.99549	2.59833	2.65728	2.52422	2.47397
metab_959	1.22699	1.13148	1.25553	1.50578	1.20059	1.65883	1.37303	1.33087
metab_960	1.73231	1.69535	1.61547	1.72061	1.63607	1.79637	1.78665	1.62558
metab_961	2.28489	2.2523	2.24726	2.27839	2.78916	2.85031	2.88582	2.71865
metab_963	2.72826	2.73083	2.81781	2.7784	3.1608	3.21944	3.12992	3.08409
metab_964	3.25355	3.12523	3.26537	3.26608	3.11951	3.3162	3.11763	3.10106
metab_965	0.0144752	0.01369	0.0141394	0.014315	0.612934	0.0184755	0.0174798	0.409544
metab_966	1.47946	1.41541	1.45602	1.55558	1.83738	1.97139	1.83886	1.74521
metab_967	1.26583	1.62174	0.972455	0.977325	1.25923	1.567	1.05716	1.48147
metab_968	1.23608	1.20304	1.46169	1.43773	1.3188	1.63486	1.90879	1.20293
metab_969	2.40802	2.36613	2.46094	2.43258	2.68819	2.62222	2.65947	2.64947
metab_970	1.84407	1.96555	1.8776	1.86904	2.23625	2.35925	2.27444	2.16156
metab_971	1.59674	1.29795	1.70429	1.34458	3.21997	2.44871	3.26931	2.0263
metab_972	2.4046	2.45082	2.51848	2.54657	2.45216	2.71689	2.30205	2.37407
metab_973	3.142	3.21855	3.12779	3.08168	3.28907	3.33041	3.23821	3.25625
metab_974	1.91393	1.9119	1.92517	1.8081	1.94017	1.96101	1.8412	1.82143
metab_975	1.63246	1.56241	1.69615	1.63229	2.36415	2.08541	2.26376	1.94303
metab_976	2.53135	2.50394	2.49745	2.46588	2.62983	2.75287	2.80138	2.60239
metab_977	0.425904	0.750485	0.414936	0.418296	0.476094	0.823256	1.264	0.92505
metab_978	2.5995	2.61385	2.5391	2.60061	2.51821	2.49785	2.54578	2.50627
metab_979	2.1169	2.08006	1.97857	2.01023	2.68633	2.79688	2.70932	2.81734
metab_981	2.05951	1.81214	1.99815	2.06245	2.70215	2.81165	2.74389	2.83888
metab_982	2.47443	2.55268	2.4491	2.44681	2.65182	2.73824	2.7633	2.78334
metab_983	2.65711	2.6905	2.64875	2.6258	2.60789	2.66914	2.59992	2.62587
metab_984	2.78957	2.82185	2.78779	2.79217	2.81432	2.93946	2.89204	2.86567
metab_985	2.12366	2.11823	2.04173	2.12092	2.42154	2.31149	2.51191	2.17414
metab_986	2.11055	2.07549	2.12728	2.03767	2.06666	2.08248	2.34261	1.97383
metab_987	1.51393	1.45375	1.35295	1.36934	1.75147	1.79498	1.76791	1.7235
metab_988	1.81968	1.51995	1.38712	1.45752	1.95071	1.93486	1.97281	1.76845
metab_989	0.959204	1.39982	1.06207	0.395826	0.658254	1.24548	1.67473	1.59467
metab_990	1.83815	1.92277	1.89971	1.84581	2.07044	2.10886	2.09699	1.9767
metab_991	1.56168	1.84578	1.69718	1.67689	1.78176	1.89227	1.70013	1.57569
metab_992	1.35966	1.10804	1.24594	1.79183	1.75866	1.40504	1.55389	1.46937
metab_994	1.51514	1.4913	1.5051	1.51038	1.84543	1.93731	1.63073	1.70291
metab_995	2.2907	2.30503	2.28953	2.26578	2.37364	2.48264	2.48898	2.32726
metab_996	2.20106	2.19265	2.20217	2.37292	2.83636	2.85914	2.72403	2.67801
metab_997	2.43568	2.36996	2.38521	2.40876	2.54623	2.63781	2.56834	2.5422
metab_998	1.61676	1.65179	1.7143	1.44704	1.65072	1.84329	2.00197	1.75826
metab_999	1.11089	0.882853	1.04191	0.902735	1.70396	1.86163	1.88263	1.73256
metab_1000	1.66553	2.07338	1.79211	1.32569	1.84858	1.53965	2.07485	1.86176
metab_1001	1.93438	1.95091	1.93456	2.04826	2.0767	2.37959	2.06108	1.97428
metab_1003	1.41518	1.27948	1.44735	1.35235	1.75657	1.82041	1.86064	1.72066
metab_1004	1.76552	2.04214	1.18306	1.42194	1.90018	1.93489	1.71353	1.82624
metab_1005	2.10804	2.21531	2.14206	2.09544	2.30367	2.26185	2.13978	1.99794
metab_1006	3.10166	3.06112	3.07176	3.16424	3.03844	2.96345	2.99247	2.96558
metab_1007	2.69573	2.64862	2.66251	2.65314	2.58494	2.63993	2.71388	2.6224
metab_1008	1.13878	0.883681	0.840065	0.917503	1.36065	1.43304	1.53013	1.32492
metab_1009	2.20173	2.16117	2.16952	2.34567	2.84035	2.91506	2.80698	2.73077
metab_1010	1.01946	0.806105	0.695644	0.115599	1.59502	1.54406	1.43293	1.37473
metab_1011	2.50377	2.44109	2.51601	2.54261	2.55573	2.80951	2.64134	2.5305
metab_1012	1.8677	1.80699	1.81806	1.99659	2.63853	2.69791	2.59712	2.50988
metab_1013	2.55771	2.55842	2.51834	2.53277	2.66438	2.70535	2.73082	2.61239
metab_1014	1.13497	0.815963	0.898222	1.32291	2.30679	2.33555	2.19977	2.05367
metab_1015	1.5428	0.920815	0.983843	1.16839	1.67653	1.57117	2.15631	1.19328
metab_1016	0.468942	0.452845	0.462128	0.465703	0.879496	0.926846	1.25156	0.493495
metab_1017	1.86679	0.383696	0.578758	0.483498	1.65841	1.27892	2.20166	1.73784
metab_1018	1.92337	1.85699	1.94867	2.1064	2.61702	2.65844	2.49228	2.48418
metab_1019	1.99824	1.98161	1.99246	1.97983	1.56757	1.54514	1.68824	1.3779
metab_1020	1.59813	1.6872	1.39257	1.32498	2.25492	2.32529	2.39249	2.19301
metab_1021	1.21456	1.28977	1.18208	1.06646	1.41563	1.6165	1.68232	1.33794
metab_1022	0.661296	0.793373	0.181302	0.362701	0.911047	1.09561	1.48456	1.03655
metab_1023	1.98418	2.08946	2.03698	2.06645	2.16706	2.21666	2.35524	2.10561
metab_1024	2.01369	1.96042	1.91362	1.89681	2.16771	2.23382	2.21508	2.18341
metab_1025	1.25419	0.966958	1.20758	1.24701	1.47335	1.7424	1.77786	1.48038
metab_1026	1.36911	1.30375	1.37598	1.65011	2.03124	2.11722	2.05564	1.73896
metab_1027	1.41999	1.47402	1.46027	1.52339	1.30248	1.70432	1.86698	1.78023
metab_1028	1.58323	1.65161	1.69829	1.51769	1.8674	1.81811	1.69016	1.6588
metab_1029	0.0456817	0.0432859	0.0446583	0.0451936	1.46419	0.0577525	1.21722	1.37416
metab_1030	2.57188	2.44558	2.51081	2.57008	2.8031	2.93891	2.87749	2.92928
metab_1031	2.93341	2.99848	2.884	2.93338	3.0409	3.14893	3.13888	3.12704
metab_1032	1.54543	1.66517	1.67996	1.66339	1.86487	1.71664	1.92222	1.78953
metab_1033	2.17191	2.23849	2.17361	2.12014	2.11635	2.23518	2.16087	2.11496
metab_1034	1.13188	1.38443	0.923249	0.477399	2.40182	1.07605	1.56153	1.12505
metab_1035	2.31728	2.71439	2.34383	1.52352	3.4068	2.07741	2.8406	2.19247
metab_1036	1.2014	1.36432	1.09453	1.10686	1.40484	1.37837	1.79413	1.12639
metab_1037	2.46297	2.52724	2.42537	2.4499	2.63636	2.71468	2.59978	2.5032
metab_1038	1.88693	1.87563	1.84149	1.85929	2.18814	2.31026	2.27275	2.10557
metab_1039	0.272955	0.261644	0.399873	0.342639	0.302593	0.326693	1.62634	0.801647
metab_1040	2.03982	2.09305	2.00567	2.08164	2.14583	2.29485	2.32758	2.10911
metab_1041	0.296653	0.77733	0.138151	0.569608	0.220628	0.841102	1.27124	1.12767
metab_1042	2.06417	1.99976	2.03649	2.03986	2.22017	2.3147	2.24587	2.18141
metab_1043	1.80745	1.74312	1.72739	1.71939	2.05409	2.16377	2.14023	2.0562
metab_1044	1.84067	1.9633	1.84006	1.87365	1.985	2.05523	2.12174	1.84714
metab_1045	1.15724	1.10596	1.14509	1.26949	0.801577	0.794545	0.580664	0.815061
metab_1046	1.19657	1.33762	1.53791	0.959478	0.106579	0.117195	0.162707	0.101354
metab_1047	2.7362	2.7131	2.66374	2.66955	2.84241	2.96447	2.88931	2.76934
metab_1049	2.17091	2.12053	2.09788	2.11551	2.29785	2.40958	2.33012	2.27442
metab_1050	2.04688	2.07089	1.94364	2.02879	2.38959	2.40929	2.29819	2.21262
metab_1051	0.119178	0.113396	0.396451	0.118003	1.04108	0.725032	1.88	1.19262
metab_1052	0.014893	0.393177	0.0145478	1.13328	0.0171033	0.85308	0.313141	0.877961
metab_1053	1.76719	1.86913	1.84603	1.46835	1.89602	1.83638	2.18272	1.96772
metab_1054	1.92137	1.87339	1.86009	1.93641	1.85857	2.07491	2.15031	1.80742
metab_1055	2.28281	2.40469	2.28465	2.22815	2.43434	2.46974	2.51559	2.39423
metab_1056	2.55445	3.01419	2.50306	1.50749	3.61527	2.2166	3.07966	2.42198
metab_1057	1.71994	1.68799	1.72907	1.7277	1.69743	1.82734	2.4333	2.0666
metab_1058	1.98301	2.07047	1.95794	2.24136	1.73633	1.70177	1.88816	1.58852
metab_1059	1.02926	1.00701	1.01988	1.02481	2.0442	1.16857	2.11269	1.06263
metab_1060	0.437482	0.37065	0.27367	0.0996099	1.09162	0.172242	1.24366	0.456334
metab_1061	2.29266	2.28692	2.28783	2.26319	2.28415	2.3208	2.39635	2.2196
metab_1062	1.82067	1.82469	1.73316	1.94872	2.39214	2.42583	2.43464	2.29757
metab_1063	0.405441	0.390671	0.427793	0.402466	0.990777	1.06188	0.954744	0.46309
metab_1064	0.980245	1.04763	0.992312	1.33483	1.72763	2.01403	1.6072	1.44463
metab_1065	2.02696	1.92427	1.926	2.02669	1.87766	2.01418	2.20484	2.00209
metab_1066	2.52605	2.42876	2.41159	2.64127	2.52082	2.8583	2.25749	2.25179
metab_1067	2.40527	2.26972	2.35989	2.39773	2.28449	2.47616	2.34099	2.31709
metab_1068	3.48443	3.49813	3.45708	3.48791	3.39882	3.45097	3.41555	3.35137
metab_1069	1.45569	1.56129	1.7477	1.90434	2.53483	3.13527	1.45979	1.52741
metab_1070	1.58759	1.57586	1.55143	1.50883	1.85245	2.07672	1.98125	1.85816
metab_1071	1.62152	1.62243	1.63119	1.66635	1.83494	1.74059	2.02415	1.5458
metab_1072	1.96297	1.96167	1.89315	1.85899	2.10049	2.08139	2.06644	1.90055
metab_1073	1.95379	1.87258	1.86514	1.77553	1.94748	2.05852	2.01071	1.8723
metab_1074	0.0185443	0.654718	0.0181161	0.01834	1.05677	0.0236389	0.507892	0.685617
metab_1076	1.94479	1.8579	1.91227	1.88929	1.79357	1.59517	1.86703	1.78958
metab_1077	1.8503	1.6868	1.81375	1.74326	1.67031	1.57735	1.75322	1.69737
metab_1078	2.34224	2.34	2.33692	2.36113	2.25842	2.33113	2.26676	2.2214
metab_1079	1.04259	1.21545	1.23767	1.4951	1.30681	1.48921	1.76129	1.90389
metab_1080	2.27784	2.24101	2.29088	2.31613	2.22666	2.27771	2.25633	2.11162
metab_1081	2.38427	2.39749	2.34517	2.32965	2.40206	2.4499	2.42463	2.34955
metab_1082	1.00717	0.621768	0.894723	1.09018	1.27732	1.4592	1.52013	1.37191
metab_1083	1.80601	1.77725	1.85133	1.80169	2.04326	2.08148	2.13238	1.88767
metab_1084	2.75622	2.73201	2.76659	2.69896	2.75614	2.85802	2.78349	2.76262
metab_1085	0.662995	1.09488	1.08813	1.35333	2.11434	2.70297	0.433444	0.404511
metab_1086	0.000102673	9.7e-05	0.505974	0.000101518	1.90739	1.45114	1.99658	0.000111715
metab_1087	1.93493	2.11619	1.98754	1.90911	2.27192	2.23398	2.14064	2.14996
metab_1088	1.55821	1.53492	1.43967	1.46452	1.85175	1.7904	2.05574	1.71354
metab_1089	1.93351	1.89505	1.869	1.87512	1.76818	1.7722	1.76065	1.61986
metab_1090	2.4998	2.46039	2.4583	2.51843	2.48604	2.71144	2.5839	2.43352
metab_1091	2.20009	2.0515	2.14291	2.18069	2.19678	2.37934	2.24662	2.22532
metab_1092	2.45304	2.24294	2.4417	2.48181	2.61867	2.74336	2.29607	2.28165
metab_1093	2.8155	2.72513	2.77589	2.86104	2.9299	3.14907	2.92306	2.85879
metab_1094	1.18767	1.01324	1.26044	1.1957	3.32534	2.93212	3.02251	2.69798
metab_1095	1.88269	1.94788	1.87763	1.91941	0.62698	0.924682	1.1186	1.00837
metab_1096	2.39261	2.34475	2.32986	2.44839	2.24268	2.50516	2.34876	2.32775
metab_1097	1.65426	1.73971	1.84605	1.94867	1.70996	1.91699	1.89495	1.8052
metab_1098	2.21567	2.11218	2.19857	2.18825	2.09865	2.21039	2.1708	2.13197
metab_1099	1.71671	1.72432	1.71345	1.68421	1.90972	2.10798	2.06895	1.78674
metab_1101	0.369033	0.355113	0.363132	0.366227	2.6777	1.27639	1.87077	1.20018
metab_1102	0.589941	0.571789	0.582268	0.586296	1.73843	1.09143	1.77238	0.617471
metab_1103	2.14168	2.06435	2.09278	2.05577	2.0143	2.13334	2.02051	1.97508
metab_1105	2.5688	2.4608	2.51494	2.56281	2.52157	2.67667	2.59385	2.47822
metab_1106	1.22071	1.05865	0.711834	1.17263	0.672268	0.642364	0.662051	1.00753
metab_1107	2.27688	2.27525	2.30425	2.29661	2.41997	2.74583	2.47654	2.32407
metab_1108	1.82193	1.81463	1.82102	1.72818	1.63727	1.70819	1.67598	1.63425
metab_1109	0.656233	0.372596	0.0560465	0.801693	1.50286	0.332623	1.67721	0.513856
metab_1111	1.53688	1.53316	1.45599	1.56177	1.49307	1.5899	1.39972	1.30444
metab_1112	2.13366	2.10285	2.09138	2.12196	2.28209	2.44837	2.35449	2.2092
metab_1113	0.92622	0.690929	0.890487	0.813529	1.96946	1.82604	2.20237	1.26584
metab_1114	2.16505	2.2361	2.19093	2.14865	2.30818	2.48035	2.47749	2.3168
metab_1115	1.98482	2.00782	2.01951	2.07153	1.85042	2.01875	2.26388	2.23011
metab_1116	0.972951	1.31683	1.1601	1.25879	1.59505	1.73697	1.69406	1.76251
metab_1118	2.30776	2.15876	2.22767	2.22476	3.49016	3.04307	3.21329	3.0801
metab_1119	2.05879	2.03372	2.05692	2.04128	2.08659	2.17871	2.12881	2.10926
metab_1120	2.13856	2.22883	2.19993	2.15144	2.41626	2.55701	2.42968	2.39998
metab_1121	1.93301	1.87229	1.93389	2.03726	2.19751	2.19059	2.36041	2.0452
metab_1122	2.43474	2.39471	2.42084	2.43784	2.48433	2.61834	2.55445	2.4363
metab_1123	0.39318	0.378688	0.387039	1.22475	2.86325	1.8838	2.33068	1.77623
metab_1124	2.52541	2.41832	2.4925	2.56859	2.42328	2.45614	2.44177	2.42195
metab_1125	1.1758	1.39051	1.43053	1.40032	2.05054	2.03012	2.30516	1.60617
metab_1126	1.32918	2.1056	1.76437	2.15807	1.968	2.08495	2.57967	2.59671
metab_1127	2.01017	1.97965	2.02401	2.12258	2.27057	2.38057	2.3368	2.2032
metab_1128	1.32647	1.55329	1.28394	1.25738	1.69472	1.896	1.59999	1.48413
metab_1129	3.1222	3.15347	3.1129	3.11897	3.22662	3.35012	3.25297	3.11969
metab_1130	1.50408	1.21535	1.50864	1.14083	1.00608	1.19763	1.1461	0.380472
metab_1131	0.665714	0.842084	1.35065	0.395688	1.69221	1.3445	2.07602	0.0101695
metab_1132	0.37527	0.613958	0.369306	0.372434	1.08826	1.10095	1.08195	0.898781
metab_1133	1.87215	2.06427	2.24859	1.94007	1.83617	2.14127	1.39416	2.61051
metab_1134	2.19468	2.20667	2.14383	2.17771	1.7144	1.83736	1.70327	1.60167
metab_1135	1.46117	1.66576	1.8243	0.594146	1.25314	1.40616	1.84396	1.79191
metab_1136	1.79953	1.90318	1.96907	2.45436	2.05047	2.42784	2.47608	2.31264
metab_1137	1.16786	0.832616	1.24115	0.48787	1.91227	2.05072	2.06791	1.86019
metab_1138	3.10919	3.15494	3.17426	3.09787	3.15837	3.24088	3.05465	3.05512
metab_1139	3.28942	3.34854	3.3999	3.32755	3.49748	3.58943	3.44867	3.39895
metab_1140	1.46348	1.65153	1.3528	1.08111	1.29608	1.44241	1.04348	1.03146
metab_1141	1.26073	1.06889	1.19907	1.08132	1.79853	1.59258	1.71226	1.4564
metab_1142	2.35011	2.39359	2.38345	2.34418	2.38947	2.49939	2.32049	2.33995
metab_1143	0.629957	0.61124	0.622048	0.6262	1.53093	2.21947	2.22993	1.545
metab_1144	0.472686	0.456517	0.465842	2.32749	3.70504	2.77944	3.19315	2.84361
metab_1145	2.07697	2.14088	2.15349	1.99521	2.09366	2.23857	2.00978	1.96805
metab_1146	2.44445	2.40913	2.41585	2.37576	1.79411	1.83719	1.94394	1.74899
metab_1147	2.45468	2.43227	2.39449	2.39824	2.32794	2.40152	2.35849	2.28739
metab_1148	1.83765	1.97132	1.93079	1.94789	2.15424	2.16414	2.18625	2.11576
metab_1149	2.51842	2.40318	2.51587	2.45127	1.83112	1.8568	1.89079	1.6723
metab_1151	0.112323	0.106835	0.109983	0.111208	3.35356	2.61272	2.89048	2.64195
metab_1152	0.785967	0.644465	0.495891	0.959073	1.72906	1.61114	1.80178	1.83237
metab_1153	2.34058	2.27676	2.26981	2.31349	2.34627	2.41647	2.35865	2.31108
metab_1154	2.1724	1.83669	2.11469	1.63385	1.63054	1.37439	2.12801	1.63293
metab_1155	1.71256	1.56719	1.80709	1.55828	1.62372	1.90176	1.62041	1.78597
metab_1156	2.53495	2.52857	2.77577	2.63336	2.57227	2.5356	3.11229	2.90973
metab_1159	1.80773	1.9116	1.62185	1.67461	2.28513	2.34341	2.12795	2.14943
metab_1160	2.08814	1.62102	1.611	2.09053	1.6812	1.73166	1.73136	1.39969
metab_1162	1.31065	1.50821	1.35199	1.5862	1.8554	1.66629	1.81447	1.56491
metab_1163	1.62716	1.83328	1.77045	1.75358	2.09861	2.27647	2.12703	2.02757
metab_1164	0.529122	0.511933	0.521851	0.525667	1.94122	2.30545	1.94033	1.83145
metab_1165	2.4464	2.47582	2.39155	2.48815	2.33289	2.37993	2.28964	2.28731
metab_1166	1.80798	1.86444	1.79675	1.77558	1.89792	2.02679	1.92614	1.79492
metab_1167	1.72944	1.70979	1.74463	1.76299	2.06976	2.21438	2.15927	2.03612
metab_1168	2.30333	2.47962	2.76112	2.4299	2.46051	2.72582	2.14474	2.98907
metab_1170	1.33099	1.37779	1.3019	1.4584	1.71146	1.71	1.87148	1.60109
metab_1171	0.333207	1.12281	1.19692	0.330582	1.68749	1.38003	2.08096	0.353232
metab_1173	1.62681	1.70486	1.72142	1.71715	1.90008	1.98669	1.90165	1.83186
metab_1174	2.92226	2.74093	2.91476	3.05601	2.97885	3.26606	2.57563	2.64051
metab_1176	1.45069	1.51959	1.57568	1.35579	1.68635	2.05498	1.929	1.70431
metab_1177	0.290953	0.279108	0.285925	0.28856	2.50969	2.44945	2.43069	2.35793
metab_1178	0.468199	0.519166	0.461391	0.598004	2.41006	2.36944	2.41093	2.43621
metab_1179	2.10048	2.15462	2.24578	2.34177	2.26506	2.31267	2.81281	2.60337
metab_1180	2.17525	2.16829	2.15412	2.25082	2.39322	2.47404	2.41619	2.30424
metab_1181	1.9412	2.21814	2.43751	2.04367	2.14238	2.22171	1.74662	2.71012
metab_1182	3.2568	3.28977	3.24907	3.25778	3.20473	3.37045	3.24869	3.14836
metab_1184	2.3333	2.3464	2.3131	2.30478	2.3568	2.34968	2.31564	2.30856
metab_1185	1.4099	1.57813	1.52374	1.45259	1.80274	1.77407	1.78351	1.61559
metab_1186	2.23894	2.2983	2.31195	2.33686	2.35084	2.32389	2.3578	2.21885
metab_1187	1.68708	1.81556	1.75896	1.83041	1.84678	1.99686	1.77045	1.59886
metab_1188	0.460354	0.606335	0.24199	0.590174	1.98828	0.951098	1.88452	0.533461
metab_1189	1.3019	1.66682	1.47144	1.61863	1.98817	1.9405	1.96702	1.70378
metab_1190	0.000182082	0.000172052	0.000177791	0.0420727	0.484938	0.000233467	0.165259	0.210136
metab_1191	0.770857	0.605523	0.637864	0.706136	1.99658	2.09494	2.08463	1.96009
metab_1192	2.15462	2.19528	2.15728	2.14281	2.36202	2.47495	2.3341	2.32995
metab_1193	0.164347	0.156741	1.01136	0.162804	1.41524	0.396642	1.63768	0.176235
metab_1194	3.34111	3.29016	3.33288	3.37485	3.20687	3.19818	3.20191	3.18284
metab_1195	1.91928	1.74342	1.6378	2.45677	2.12246	1.82677	2.6483	2.35243
metab_1197	1.11466	0.813545	0.932384	1.23994	1.35539	1.41666	1.03231	1.01577
metab_1198	1.11825	1.02885	0.94579	1.47953	1.67859	1.69697	1.44148	1.59782
metab_1199	1.50352	1.37141	1.27215	1.25469	1.96404	2.01577	1.88648	1.88502
metab_1200	1.60253	1.6936	1.50227	1.55978	1.78923	1.8495	1.79228	1.81286
metab_1201	2.68216	2.62122	2.68996	2.67067	2.9564	3.01472	2.91301	2.98349
metab_1202	1.82334	1.81025	1.82452	1.89796	1.84347	1.85389	1.95035	1.67412
metab_1203	2.01487	2.02121	2.39832	2.13448	1.82113	1.82708	1.78748	1.67382
metab_1204	3.51272	3.53671	3.48525	3.38351	3.62381	3.71455	3.58131	3.66363
metab_1205	2.40832	2.4185	2.38125	2.41802	2.55568	2.70839	2.60845	2.53116
metab_1206	1.70897	2.09917	1.89632	1.95994	2.23289	2.22979	2.13418	2.2075
metab_1208	1.23706	1.54263	1.48333	0.897101	1.67894	1.70149	1.81154	1.6111
metab_1209	1.35588	1.42408	0.745396	1.29221	1.67306	1.77211	1.48391	1.42043
metab_1210	2.15183	2.19238	2.08519	2.1588	2.2147	2.39018	2.32876	2.10006
metab_1211	2.15981	2.22197	2.09224	2.33837	2.55622	2.51741	2.41763	2.47345
metab_1212	1.55801	1.55777	1.51543	1.64616	1.76379	1.83155	1.63228	1.65393
metab_1213	2.0149	2.03555	2.05032	2.23487	2.26077	2.23949	2.34175	2.27957
metab_1214	1.70146	1.88968	1.83975	1.8249	2.39042	2.39153	2.30743	2.26105
metab_1215	2.25563	2.3189	2.26918	2.31573	2.29861	2.3586	2.32412	2.28368
metab_1216	1.62703	1.71051	1.66744	1.67386	2.1095	1.96458	2.01845	2.15989
metab_1217	2.08943	2.15917	2.05952	2.38994	2.39067	2.42107	2.31368	2.25673
metab_1218	2.19572	2.22961	2.31856	2.1815	2.62435	2.66121	2.48585	2.5418
metab_1219	0.991328	1.47407	1.51005	1.60303	1.66555	1.76722	1.57668	1.73223
metab_1220	2.10601	2.02842	2.02134	2.17716	2.43696	2.52777	2.42257	2.30703
metab_1222	2.08026	2.09862	1.9764	2.05718	2.26914	2.23609	2.21035	2.16036
metab_1223	0.805054	0.882727	0.471764	0.930708	1.50902	1.51449	1.63688	1.55359
metab_1224	2.36049	2.42056	2.35441	2.40859	2.47987	2.48153	2.45835	2.44447
metab_1225	2.74851	2.74216	2.80014	2.81212	2.69081	2.71169	2.65495	2.6675
metab_1226	0.342887	0.371966	0.944269	0.232577	1.32318	0.81172	1.09437	0.72604
metab_1227	1.55394	1.26118	1.68586	1.61511	2.25495	2.61784	2.11617	2.08383
metab_1228	2.2933	2.275	2.12464	2.43194	2.59215	2.6933	2.52917	2.4474
metab_1229	0.869951	0.373032	1.03436	1.48339	1.89841	1.40513	1.89053	0.941507
metab_1230	2.59372	2.55674	2.57703	2.69271	3.02039	3.06201	2.93632	2.88538
metab_1231	2.65587	2.49162	2.55455	2.62433	3.01701	2.99276	2.91936	2.86858
metab_1232	0.779536	0.738521	0.625435	1.06476	0.524262	0.267363	0.256245	0.236024
metab_1233	2.34855	2.34314	2.33933	2.36324	2.36494	2.32594	2.35037	2.35045
metab_1234	1.83625	1.82265	1.661	1.76101	1.91316	1.96305	1.8256	1.87947
metab_1235	1.47347	1.49234	1.73049	1.83241	2.35459	2.13413	2.063	2.15434
metab_1237	1.87195	1.79935	1.80338	1.86441	2.06161	2.05207	1.92308	2.06651
metab_1238	2.17397	2.04882	2.21021	2.27566	2.52577	2.56437	2.47766	2.44882
metab_1239	1.78844	1.82484	1.87916	1.91988	2.07384	2.17197	2.06567	1.97783
metab_1240	3.26887	3.23131	3.26936	3.20899	3.44311	3.52694	3.37562	3.45332
metab_1241	1.17361	1.38242	1.25595	1.49743	1.9024	1.74671	1.81935	2.1582
metab_1242	3.34566	3.33846	3.31063	3.35884	3.36504	3.48542	3.44178	3.334
metab_1243	2.43491	2.41229	2.46558	2.40578	2.70819	2.77462	2.61521	2.63926
metab_1244	1.4473	1.44121	1.41712	0.70794	2.08328	2.07421	1.66245	2.01823
metab_1245	1.87823	1.85334	2.00879	2.07091	2.10883	2.32666	2.07838	2.08966
metab_1246	2.59041	2.6135	2.5567	2.68707	2.76959	2.88468	2.78011	2.70125
metab_1247	1.31932	1.40682	1.37949	1.4986	1.89063	1.94943	1.79475	1.74865
metab_1248	1.87828	1.7966	1.93344	1.68157	2.84842	3.04416	2.91822	2.93418
metab_1249	2.4895	2.35455	2.3306	2.41314	2.28082	2.65322	2.25316	2.36106
metab_1250	2.19209	2.32367	2.21456	2.34405	2.28397	2.37861	2.4445	2.25887
metab_1251	2.11805	2.11516	2.19878	2.24864	2.89238	3.00568	2.81777	2.85855
metab_1252	1.26188	1.23424	1.40733	1.15578	1.94378	2.00624	1.92592	1.7778
metab_1253	2.39541	2.59802	2.52848	2.77613	2.69418	2.77	2.65227	2.71542
metab_1255	1.68492	1.65082	1.66063	1.77646	2.25504	2.39927	2.22849	2.17893
metab_1256	2.13954	2.23537	2.16424	2.24718	2.35761	2.44331	2.30445	2.19077
metab_1257	1.48008	1.36412	1.5681	1.30935	1.97454	2.02924	1.87544	1.86523
metab_1258	2.22037	2.26435	2.26954	2.09518	2.29057	2.38206	2.3354	2.26994
metab_1259	3.56422	3.61245	3.61652	3.63517	3.49912	3.62018	3.53615	3.49981
metab_1260	1.94742	1.91066	1.98122	1.93704	1.78624	1.89425	1.77777	1.73411
metab_1261	1.40921	1.25534	1.71342	1.58706	1.8288	2.07436	1.70832	1.91284
metab_1262	4.86403	4.86437	4.89091	4.93489	4.80292	4.89234	4.91604	4.78111
metab_1263	4.67336	4.70303	4.70779	4.73226	4.60786	4.70248	4.70666	4.57544
metab_1264	2.15425	2.53542	2.05574	2.67965	1.75321	1.85469	1.72398	1.83996
metab_1265	1.99846	2.15973	2.20388	1.9783	2.3755	2.13873	2.31802	2.4974
metab_1266	1.4027	1.46546	0.769343	1.11918	2.5719	3.13724	2.75172	2.6471
metab_1267	2.35016	2.27809	2.31412	2.36557	2.09249	2.12525	2.08263	2.02926
metab_1268	3.75723	3.24081	3.24304	3.59222	3.32931	3.64582	3.45589	3.7102
metab_1269	2.76216	2.7658	2.79966	2.8522	2.60294	2.78609	2.7375	2.55724
metab_1270	1.88964	1.9923	1.68208	1.84902	1.68102	2.02444	1.79949	1.83171
metab_1271	1.9636	2.50595	2.501	2.51216	1.99159	1.875	1.84819	2.25633
metab_1272	2.57128	2.42952	2.48308	2.61654	2.61421	2.68073	2.43074	2.47095
metab_1273	1.80475	1.88355	1.67341	1.644	1.81453	1.89374	1.88613	1.62926
metab_1274	3.13179	3.16629	3.11238	3.063	3.04702	3.01786	3.07448	3.07107
metab_1275	2.43307	2.38174	2.32216	2.31785	2.27848	2.33009	2.35513	2.28347
metab_1276	2.96091	3.09193	3.05963	2.8578	2.7915	2.776	2.93101	2.9517
metab_1277	3.30945	3.50173	3.4596	3.37415	3.29818	3.35951	3.33393	3.33807
metab_1279	2.9606	3.06261	2.98594	2.96538	2.91024	2.88032	2.91183	2.88383
metab_1280	2.88544	2.93324	2.94598	2.99914	3.06508	3.19923	3.106	2.97956
metab_1281	1.99983	1.99826	1.48084	1.88097	2.08045	2.15946	1.74936	1.97224
metab_1282	2.41698	2.46435	2.49606	2.44863	2.53567	2.52269	2.53118	2.46087
metab_1283	0.610843	0.896868	0.754132	0.607138	1.19959	1.46858	0.675262	1.1815
metab_1284	3.28202	3.17154	3.38901	3.39094	3.02508	3.13824	3.07223	2.99752
metab_1285	1.76969	1.78522	1.9534	2.00932	2.21063	2.26506	2.33337	2.32702
metab_1286	1.81189	1.89064	1.76185	1.74002	2.27913	2.17862	2.20179	2.00712
metab_1287	2.40291	2.40251	2.29467	2.34399	2.71051	2.78626	2.69486	2.56485
metab_1288	1.86538	1.88408	1.84073	1.92896	2.37531	2.40195	2.34449	2.32567
metab_1289	2.47486	2.51111	2.4654	2.4382	2.56588	2.68176	2.58497	2.50213
metab_1290	1.50402	1.44542	1.35912	1.60703	1.94125	1.9825	1.77425	1.81637
metab_1291	1.30018	1.40266	1.10074	1.39822	1.99238	2.09489	2.06075	1.94503
metab_1292	3.01373	3.03197	2.94183	2.87521	3.26311	3.38211	3.1999	3.28355
metab_1293	2.79265	2.8096	2.83026	2.79869	2.93799	2.94103	2.84224	2.8418
metab_1294	2.53144	2.45566	2.48263	2.55587	2.69795	2.79013	2.69697	2.61546
metab_1295	1.9118	1.71029	1.57687	1.99567	2.3576	2.44892	2.25122	2.28553
metab_1296	1.73135	1.54321	1.49769	1.68158	1.68572	1.67739	1.7615	1.73043
metab_1297	3.74009	3.74941	3.7085	3.75939	3.62301	3.72545	3.61377	3.57107
metab_1298	2.03926	1.89149	2.06933	2.12167	2.55897	2.65916	2.58864	2.46219
metab_1299	1.82609	1.61517	1.84796	1.87918	1.73461	1.80068	1.83736	1.70854
metab_1300	1.55741	1.58425	1.70478	1.80662	2.3079	2.31968	2.37231	2.29396
metab_1301	3.2494	3.28892	3.23113	3.27087	3.13217	3.21475	3.12036	3.08705
metab_1303	2.05002	1.90082	1.91152	1.94545	2.20505	2.14599	2.26776	2.11897
metab_1304	2.6546	2.89886	2.61397	2.62524	2.71776	2.74312	2.67733	2.64234
metab_1305	2.12618	2.16659	2.14918	2.17416	2.28725	2.32167	2.34268	2.25605
metab_1306	2.59408	2.60064	2.59345	2.52979	2.48388	2.5763	2.49765	2.47704
metab_1307	2.62947	2.77209	2.60787	2.7389	2.84122	2.91889	2.82444	2.82002
metab_1308	3.10816	3.10516	3.012	2.92784	3.15638	3.27631	3.0763	3.18777
metab_1309	3.7227	3.74187	3.70375	3.73827	3.60204	3.72421	3.60008	3.56275
metab_1310	2.96381	2.90621	2.93936	3.00891	2.79616	2.75062	2.80514	2.78819
metab_1311	2.69117	2.71626	2.68172	2.76585	2.82087	3.02194	2.8996	2.79422
metab_1312	2.32158	2.49029	2.26945	2.44282	2.14071	2.37312	2.25795	2.05868
metab_1313	2.58175	2.65409	2.65878	2.58152	2.67953	2.76336	2.6845	2.64775
metab_1314	2.28243	2.38169	2.26037	2.38508	0.73756	0.864346	0.803513	0.589219
metab_1315	1.78078	1.18643	1.65614	1.70041	2.18226	2.34378	2.13176	2.10901
metab_1316	2.46286	2.37562	2.46841	2.43688	3.32431	3.3701	3.63779	3.39897
metab_1317	2.01931	2.16757	2.13678	2.0108	2.55015	2.53341	2.4589	2.34761
metab_1318	2.37719	2.35384	2.30864	2.38145	2.37901	2.33204	2.22269	2.23405
metab_1319	1.77849	1.94763	1.76165	1.88674	1.98038	2.11399	1.92971	1.83792
metab_1320	1.86858	1.99001	1.86617	1.90219	2.35966	2.30876	2.28403	2.21669
metab_1321	2.30104	2.27731	2.2947	2.32249	2.4	2.25458	2.33537	2.37207
metab_1322	1.69953	1.40426	2.29182	2.03928	1.45673	1.64774	2.27312	1.33121
metab_1323	2.14283	2.15982	2.13202	2.13482	2.22968	2.17754	2.34745	2.18417
metab_1324	2.11107	2.06003	2.11174	2.07746	2.31558	2.45563	2.3055	2.09887
metab_1325	2.55947	2.39584	2.5125	2.64871	2.54237	2.88496	2.3377	2.32133
metab_1326	1.86288	1.91611	1.97225	1.80091	2.16132	2.14465	2.26688	2.19545
metab_1327	2.52697	2.60779	2.58867	2.61898	2.79079	2.87661	2.75785	2.6321
metab_1328	2.44056	2.4299	2.49626	2.49585	2.883	2.94866	2.9129	2.77645
metab_1329	2.24484	2.24619	2.27743	2.43136	2.29371	2.36419	2.26906	2.03256
metab_1330	1.77436	1.63207	1.49724	1.68216	1.78636	1.76784	1.70096	1.36084
metab_1331	2.22031	2.08527	2.07473	2.02591	2.61551	2.66839	2.62264	2.5394
metab_1332	1.8961	2.04893	1.78109	2.02142	2.27702	2.29056	2.31518	2.18929
metab_1333	2.53825	2.4607	2.63046	2.65401	2.90923	2.91718	3.06496	2.77023
metab_1334	2.18362	2.16788	2.14984	2.19565	2.54958	2.68919	2.56546	2.43494
metab_1335	2.00699	2.00637	2.01989	2.12636	2.32393	2.41029	2.24383	2.17931
metab_1336	2.0162	1.99691	2.00433	1.93316	2.37207	2.47698	2.26668	2.2295
metab_1337	1.7321	1.80781	1.87145	1.9559	1.82892	1.70459	1.74173	1.77822
metab_1338	2.50025	2.4553	2.47741	2.38207	2.7302	2.73982	2.56991	2.71729
metab_1339	2.08764	2.12237	2.0556	2.20256	2.68768	2.72317	2.62722	2.52171
metab_1340	2.28441	2.13798	2.17751	2.21552	2.62737	2.73274	2.54019	2.46622
metab_1341	1.82079	1.76739	1.82907	1.76766	2.04037	2.18721	2.05239	1.80979
metab_1342	1.91624	2.25183	2.07919	2.31832	1.92667	2.07533	2.07813	2.01334
metab_1343	2.27713	2.34248	2.29178	2.29299	2.32901	2.45981	2.46093	2.32402
metab_1344	2.60685	2.54535	2.51884	2.49945	2.85295	2.97874	2.90448	2.79424
metab_1345	2.03614	1.98303	2.05715	1.9644	2.18798	2.18609	2.19795	2.19354
metab_1346	1.95987	2.0301	2.01808	2.00683	2.04577	1.90626	1.94971	2.14977
metab_1347	1.92288	1.97943	1.88586	1.82579	2.0523	2.19001	2.17421	1.94005
metab_1348	2.14358	2.0841	2.08175	2.08921	2.3115	2.46479	2.36562	2.21833
metab_1349	3.14184	3.11071	3.22063	3.30478	2.98219	3.08854	3.05743	3.01097
metab_1350	3.99941	4.09089	4.04612	4.09426	4.04897	4.04433	4.0198	4.01765
metab_1351	2.36178	2.27258	2.25161	2.38926	2.60508	2.74424	2.6855	2.59615
metab_1352	2.78964	2.72597	2.80693	2.88596	2.38581	2.59747	2.60574	2.51987
metab_1354	2.77447	2.79814	2.82306	2.77481	2.7913	2.82892	2.63098	2.68082
metab_1356	2.71247	2.99903	2.67191	2.8048	2.99269	3.00732	2.91187	2.88161
metab_1358	3.27068	3.30209	3.29695	3.28451	3.22537	3.2609	3.15939	3.17214
metab_1359	1.8038	1.99943	1.5552	1.81386	0.924408	0.812758	0.992108	0.945877
metab_1360	1.85158	1.88219	1.819	1.90647	2.23517	2.43254	2.20861	2.07934
metab_1361	2.16621	2.2724	2.11938	2.25168	2.36964	2.48777	2.32509	2.18556
metab_1362	2.27308	2.14931	2.14197	2.32556	1.79901	2.16942	1.87063	1.53782
metab_1363	0.866131	1.56043	0.289574	0.292233	1.4576	2.15363	0.337743	0.313094
metab_1364	1.33703	1.66278	1.32863	1.40048	2.30693	2.59701	2.17584	2.11375
metab_1365	0.989087	0.883079	0.578804	1.05256	1.30605	1.36473	0.483658	1.30713
metab_1366	2.7489	2.81691	2.79511	2.69875	2.91903	2.91693	2.97143	3.04506
metab_1367	2.10587	2.35141	2.15907	2.15099	2.41511	2.24886	2.19446	2.24601
metab_1368	2.37818	2.41803	2.33828	2.49209	2.23949	2.17885	2.02572	1.85938
metab_1369	1.85874	1.97965	1.94103	2.09946	2.15014	1.9731	1.7205	1.73905
metab_1370	2.04358	2.08043	2.02553	2.01788	2.25235	2.19357	2.15747	2.23317
metab_1371	1.90071	1.87047	1.84057	1.93509	2.21637	2.24796	2.11923	2.10085
metab_1372	1.92561	1.97495	2.04814	1.95725	2.14147	2.09389	2.17444	2.00908
metab_1373	1.57599	1.83362	1.75216	1.72443	1.96453	1.84407	2.27195	1.76588
metab_1374	2.73635	2.83288	2.80247	2.82583	2.91944	3.0286	3.00875	2.92518
metab_1375	1.73503	1.74816	1.81857	1.783	2.14127	2.06263	2.09011	1.70916
metab_1376	1.81511	1.96908	1.97296	2.02005	2.11711	2.06269	2.07371	2.01046
metab_1377	1.70532	1.85276	1.6955	1.97221	2.27897	2.14077	2.18552	1.99071
metab_1378	1.89871	2.07109	2.18754	2.01741	2.53213	2.62873	2.49689	2.53178
metab_1379	0.298792	1.10303	1.12973	0.901576	1.33357	1.33096	1.09449	0.317416
metab_1380	1.83986	2.15218	1.7756	2.18723	2.38753	2.33512	2.27465	2.23938
metab_1381	2.08116	2.30387	2.2656	2.26977	2.5655	2.54469	2.44331	2.40713
metab_1382	2.69011	1.95664	1.94303	1.69591	2.45215	2.10132	2.16915	2.01984
metab_1383	1.94316	2.10156	2.16904	2.17708	2.38319	2.38303	2.37116	2.20973
metab_1384	1.68294	1.76576	1.68132	1.72669	2.23363	1.97734	1.91039	1.8722
metab_1385	0.74383	1.4575	1.43725	1.49112	2.10339	1.90098	1.9931	1.88697
metab_1386	2.13591	2.30101	2.25712	2.34821	2.57978	2.55692	2.61133	2.54108
metab_1387	2.22334	2.38232	2.16176	2.14377	2.01313	2.15792	1.94891	1.99213
metab_1388	2.15598	2.18927	2.03369	2.19922	2.6241	2.42946	2.43466	2.3385
metab_1389	2.76294	2.79627	2.77305	2.80571	2.96836	3.15794	2.97498	2.92192
metab_1390	0.752673	1.28477	1.40687	1.26837	1.8577	1.92714	1.82128	1.74209
metab_1391	2.22247	2.30484	2.26492	2.25853	2.41485	2.47982	2.45599	2.32365
metab_1392	0.903389	0.875797	0.899108	0.97928	1.57509	1.22347	1.49364	1.57081
metab_1393	2.95148	2.94069	2.98064	2.93058	2.86216	2.88179	2.85867	2.83175
metab_1394	2.25414	2.34119	2.26137	2.28896	2.50744	2.41953	2.38401	2.3613
metab_1395	2.19773	2.27019	2.26638	2.28013	2.38124	2.32717	2.33545	2.42929
metab_1396	2.16511	2.14146	2.41896	3.36848	1.57566	1.63157	1.44831	1.63333
metab_1397	2.30083	2.36023	2.37666	2.33535	2.2807	2.36883	2.23879	2.18993
metab_1398	1.87255	1.657	1.76069	1.8205	1.91842	2.08964	1.95189	2.02855
metab_1400	1.89722	1.78769	1.86818	1.94793	2.32512	2.43355	2.37763	2.33839
metab_1401	1.77999	1.79261	1.65898	1.98129	2.32099	2.42577	2.40906	2.26413
metab_1402	2.42322	2.4235	2.44784	2.4626	2.23293	2.2976	2.12971	2.06182
metab_1403	2.75814	2.73487	2.73168	2.7308	2.84659	2.86465	2.83027	2.80439
metab_1404	2.43853	2.37327	2.34986	2.31557	2.6449	2.61756	2.65381	2.44956
metab_1405	2.09729	2.111	2.1559	2.07491	1.997	2.16828	2.0739	2.06933
metab_1406	2.02106	2.08353	1.98061	2.1476	2.19478	2.35929	2.29381	2.1478
metab_1407	1.74765	1.01973	1.5974	2.03626	2.55749	2.54813	2.4303	2.77165
metab_1408	2.08338	2.08906	2.14155	1.93199	2.09934	2.22885	2.09376	2.12439
metab_1409	1.83141	1.93085	1.88881	2.05275	2.39412	2.36827	2.47798	2.40422
metab_1410	2.21906	2.24931	2.3303	2.2956	2.62674	2.58972	2.62849	2.57796
metab_1411	2.67199	2.61435	2.66322	2.6838	2.6425	2.75049	2.75026	2.72914
metab_1412	0.969471	0.708031	0.927299	1.04944	1.76697	1.02794	1.51491	1.61881
metab_1413	2.23439	2.25653	2.31986	2.30985	2.67227	2.65933	2.71223	2.68231
metab_1414	2.44265	2.47869	2.4642	2.61073	2.70245	2.81768	2.74165	2.77305
metab_1415	2.89728	2.83193	2.91131	2.87697	3.16114	3.19669	3.16885	3.14794
metab_1417	2.52981	2.55036	2.55526	2.52185	2.87503	2.98053	2.94506	2.94872
metab_1418	2.46312	2.43901	2.37695	2.50765	2.70846	2.61755	2.48536	2.53578
metab_1419	2.57672	2.59303	2.64265	2.64172	2.60915	2.66908	2.69752	2.53683
metab_1420	1.95876	2.01105	1.9935	1.97096	2.16807	2.34222	2.27161	2.24231
metab_1421	2.54788	2.34816	2.40918	2.57748	2.61749	2.76541	2.67322	2.58867
metab_1422	2.56259	2.56645	2.5569	2.61006	2.82346	2.82815	2.73228	2.76927
metab_1423	2.36346	2.29534	2.50161	2.41039	2.40499	2.52434	2.60413	2.40419
metab_1424	2.43155	2.39978	2.45868	2.3216	2.69159	2.67849	2.72372	2.64905
metab_1425	2.83255	2.86446	2.73378	2.7802	2.6739	2.73421	2.70421	2.64465
metab_1426	2.12663	1.98909	2.073	2.00633	2.29017	2.33346	2.28333	2.24312
metab_1427	1.97598	1.95243	1.94145	2.01749	2.26629	2.24438	2.49098	2.2035
metab_1428	1.60263	1.54772	1.44777	1.36756	1.85426	1.56181	1.51307	2.47816
metab_1429	1.93966	1.85647	1.75796	2.08699	1.89863	1.94806	1.75798	2.01713
metab_1430	2.095	2.13243	2.17733	1.97962	2.26743	2.2927	2.2775	2.14688
metab_1431	2.19042	2.04012	1.8819	2.29575	1.82101	2.33688	2.05938	1.96205
metab_1432	2.11219	2.09826	2.00449	2.11282	2.16099	2.19065	2.1087	2.04069
metab_1433	2.31849	2.32565	2.35888	2.24273	2.63274	2.70659	2.53312	2.59465
metab_1434	1.68706	1.80287	1.64843	1.725	1.73597	2.02374	1.97808	1.66699
metab_1435	3.3566	3.32712	3.3025	3.2899	3.64934	3.71041	3.52776	3.67422
metab_1436	2.95473	2.95905	2.93711	2.93324	3.08449	3.05527	3.24364	2.99837
metab_1437	0.925803	0.881645	0.692067	0.526687	1.68835	1.63617	1.65667	2.26312
metab_1438	3.05976	3.13837	3.07513	3.05224	3.13811	3.14988	3.13789	3.0624
metab_1439	2.85655	2.82473	2.78574	2.83578	3.3146	3.23714	3.1921	3.55657
metab_1440	1.94306	1.60305	1.87661	1.66543	2.48481	2.44217	2.35974	2.56285
metab_1441	1.65861	1.61248	1.54496	1.5775	1.7698	1.78442	1.69073	1.72965
metab_1442	0.80465	0.370388	0.378624	1.00137	1.91382	2.13516	1.97167	1.8865
metab_1443	1.83697	1.89815	1.88519	2.01049	1.86082	1.977	1.78141	1.6455
metab_1444	2.38079	2.37635	2.28606	2.32269	2.45314	2.48285	2.45223	2.2879
metab_1445	2.08587	2.08777	2.04585	2.12292	2.27304	2.35182	2.27704	2.2049
metab_1446	2.90888	2.92701	2.88381	2.85868	3.01426	2.99807	3.15525	3.02927
metab_1447	1.97285	1.93312	1.91485	2.0455	2.20696	2.19398	2.0884	2.57367
metab_1448	2.10011	2.06132	2.17108	2.13808	2.41337	2.40224	2.49959	2.21267
metab_1449	2.05371	1.95555	1.97486	1.93096	2.23859	2.29036	2.20774	2.22215
metab_1450	1.54266	1.39697	1.27267	1.63796	0.262011	2.16922	1.37522	0.251063
metab_1451	2.00804	1.72446	1.92388	1.8997	2.08817	2.20038	2.13827	2.00656
metab_1452	1.85799	1.79888	1.90887	1.90278	2.01323	1.82541	1.69734	2.139
metab_1453	1.38887	0.94415	1.10533	1.11104	1.47492	1.87517	1.39455	1.32374
metab_1454	2.76193	2.74861	2.82212	2.78524	2.74393	2.74061	2.74765	2.76026
metab_1455	1.25744	1.10962	1.25613	1.19639	1.64737	1.72365	1.54143	1.32153
metab_1456	2.44268	2.47829	2.58903	2.39364	2.55262	2.5887	2.60862	2.47956
metab_1457	1.79747	1.82617	1.68338	1.95579	2.08076	2.28403	1.86475	1.88592
metab_1458	2.56524	2.56213	2.59878	2.58926	2.61312	2.643	2.56668	2.61183
metab_1459	2.50776	2.51873	2.77106	2.90727	2.67893	2.84491	2.76271	2.61836
metab_1460	2.27258	2.28485	2.18115	2.25276	2.33904	2.39623	2.40757	2.3294
metab_1461	2.20499	2.07751	2.32695	2.39108	2.1221	2.39454	2.05282	1.98464
metab_1462	4.66243	4.62763	4.70514	4.64571	4.62534	4.68502	4.62007	4.62712
metab_1463	2.83276	2.80094	2.80185	2.73858	2.81071	2.89001	2.7122	2.64013
metab_1465	2.35929	2.37219	2.40687	2.44284	2.55304	2.71383	2.4097	2.41775
metab_1466	0.803653	0.783001	1.79734	1.60836	0.855796	0.896345	0.874981	1.15749
metab_1467	1.98108	2.07359	1.72172	1.88541	2.53246	2.46446	2.26301	2.21181
metab_1468	4.167	4.16411	4.2334	4.16794	4.14635	4.15615	4.15736	4.14439
metab_1469	1.63863	1.34467	1.46344	1.2675	1.77796	1.59718	1.46173	1.44496
metab_1470	2.93839	2.97105	2.95644	2.87392	2.99829	3.03258	3.00309	2.92113
metab_1471	2.23711	2.28554	2.40834	2.23454	2.44412	2.34358	2.43309	2.2975
metab_1472	2.15348	2.17304	2.16538	2.0913	2.83323	2.63647	2.50012	3.15858
metab_1473	2.5583	2.52292	2.46379	2.55196	2.60338	2.70731	2.6893	2.61308
metab_1474	1.55904	1.52061	1.70275	1.57699	1.85592	1.87188	1.89605	1.6718
metab_1475	1.22062	1.40374	1.02643	1.1737	1.84557	1.8368	1.88254	1.6703
metab_1476	2.03068	2.04775	1.99244	1.91904	1.96944	1.83276	1.96128	1.83423
metab_1477	1.56347	1.37689	1.54525	1.53352	1.93794	1.91701	1.60244	1.70792
metab_1478	3.53102	3.57251	3.52599	3.48652	3.73519	3.80134	3.68447	3.57687
metab_1479	2.74487	2.70757	3.07872	3.15494	2.55264	2.52663	2.44977	2.49046
metab_1480	4.18733	4.22289	4.20838	4.17955	4.1617	4.19932	4.15549	4.16432
metab_1481	2.52849	2.52155	2.5625	2.50285	2.97014	3.06486	2.95139	2.66717
metab_1482	2.10592	2.32646	2.12462	2.29728	2.60388	2.58162	2.9308	2.34719
metab_1483	2.3384	2.49798	2.40033	2.34572	2.46615	2.55615	2.57711	2.38471
metab_1485	2.78081	2.82611	2.82401	2.69889	2.92421	2.91159	2.85799	2.7827
metab_1487	0.226317	0.735078	0.731452	0.722476	1.02822	1.27242	0.925284	1.7451
metab_1488	3.64517	3.65432	3.54671	3.4517	3.78443	3.79193	3.72442	3.69506
metab_1489	1.09786	1.56783	0.990331	1.6842	1.45709	1.44127	2.44828	1.00826
metab_1491	3.43895	3.46327	3.36997	3.48497	3.73952	3.79525	3.71957	3.7728
metab_1492	2.5848	2.82492	2.46075	2.55115	1.94312	2.08837	2.22603	1.80912
metab_1494	0.0111879	1.17679	0.0109275	0.812514	1.85891	1.90503	2.0128	1.37231
metab_1495	2.59121	2.62339	2.46575	2.53009	2.93475	3.03675	2.93539	3.01984
metab_1496	0.756791	0.022357	1.26953	2.26513	2.52187	2.29025	1.96524	1.93827
metab_1498	1.63939	1.69821	1.64093	1.53995	1.85745	1.86293	1.84178	1.73633
metab_1499	1.74627	1.63365	1.81435	1.73114	1.69142	1.62943	1.78633	1.65898
metab_1500	0.778858	0.758437	0.770238	0.774765	1.45131	1.99963	1.8463	1.20824
metab_1501	2.31804	2.29222	2.29646	2.27829	2.75486	2.73561	2.67413	2.81485
metab_1502	2.29733	2.31071	2.25743	2.32513	2.15631	2.22672	2.19419	2.0868
metab_1503	2.2501	2.24758	2.28739	2.36447	2.61564	2.66341	2.6392	2.42363
metab_1504	2.36161	2.39268	2.43799	2.45621	2.6378	2.83504	2.81008	2.58227
metab_1505	1.72623	1.62384	2.07162	1.77374	1.95399	1.89787	2.04335	1.83202
metab_1506	2.30123	2.30177	2.30106	2.30405	2.34573	2.45987	2.42145	2.23792
metab_1507	2.71436	2.71901	2.68449	2.6344	2.86279	2.90074	3.11167	2.78428
metab_1508	1.89773	1.93824	1.96119	1.9583	2.09628	2.06915	2.19086	2.0462
metab_1509	2.47527	2.44199	2.4597	2.5045	2.68811	2.76179	2.69559	2.66325
metab_1510	2.31692	2.19818	2.29646	2.23502	2.5171	2.5701	2.44452	2.39532
metab_1511	1.93541	1.45582	1.74553	1.65228	1.79953	1.8093	1.83251	1.68627
metab_1512	1.43751	0.940402	1.57243	1.44287	1.9718	1.96664	2.06772	1.95574
metab_1513	2.43242	2.36944	2.38841	2.39709	2.73844	2.77215	2.68106	2.53157
metab_1514	2.57643	2.44843	2.5446	2.53796	2.73447	2.85294	2.70691	2.69589
metab_1515	2.15225	2.12151	2.18133	2.24872	2.67605	2.69019	2.6073	2.58152
metab_1516	2.32536	2.37325	2.33472	2.2571	2.3688	2.46694	2.5297	2.34164
metab_1517	3.44623	3.46526	3.50545	3.44858	3.45786	3.28878	3.41048	3.49386
metab_1518	2.52462	2.5113	2.52596	2.42078	2.54226	2.59852	2.56101	2.41033
metab_1519	2.41884	2.42517	2.36121	2.41001	2.53235	2.62038	2.56686	2.56115
metab_1520	0.715109	1.31296	1.29254	1.18942	0.0164669	0.691429	1.19516	0.320354
metab_1521	2.67222	2.57488	2.56538	2.52891	3.03098	2.87866	2.83899	3.34221
metab_1522	2.49945	2.45115	2.65476	2.65065	2.73778	2.93384	3.17113	2.67763
metab_1523	2.65892	2.6364	2.64169	2.66809	2.50938	2.55095	2.51365	2.4678
metab_1524	0.469482	0.43876	0.361478	0.364564	1.81273	0.707508	0.981341	1.81892
metab_1525	3.18564	3.17605	3.21787	3.17825	3.18798	3.04971	3.10019	3.16271
metab_1526	2.62824	2.61285	2.56255	2.5173	2.6634	2.73744	2.78017	2.54586
metab_1527	2.28339	2.24339	2.12007	2.21864	2.6188	2.66492	2.42012	2.6632
metab_1528	2.2426	2.306	2.13761	2.00487	2.81623	2.79897	2.66462	2.88201
metab_1529	1.48331	1.44057	1.25661	0.804159	2.82277	2.96019	3.55141	2.69991
metab_1530	2.23768	2.17064	2.23659	2.44313	2.31978	2.50921	2.1111	2.32227
metab_1531	2.22488	2.27068	2.40676	2.64822	2.392	2.20364	2.22025	2.36513
metab_1532	2.24225	2.08525	2.24236	2.59932	2.4738	2.70902	2.30441	2.37392
metab_1534	2.25279	2.40742	2.30569	2.11687	2.33347	2.34051	2.28444	2.40299
metab_1535	2.85797	2.92488	3.16374	2.95867	3.19253	3.39636	3.29194	3.11706
metab_1536	2.59622	2.56529	2.54772	2.51896	2.47968	2.47868	2.3803	2.43311
metab_1537	1.81468	1.91196	2.03456	1.91039	1.88494	1.91009	1.77393	1.8364
metab_1538	3.3679	3.32455	3.41991	3.35846	3.35035	3.3457	3.32763	3.31258
metab_1539	2.5315	2.52916	2.62113	2.57929	2.95635	3.20988	3.19991	3.01416
metab_1540	2.13472	2.18628	2.27475	2.11016	2.07675	2.47983	2.55166	2.24389
metab_1541	1.78425	1.80583	1.68762	1.94064	2.37712	2.19129	2.53899	2.64199
metab_1542	2.5026	2.65911	2.55024	2.57346	2.61449	2.70626	2.60305	2.61629
metab_1544	2.58761	2.64753	2.54747	2.54481	2.59341	2.72392	2.63764	2.53684
metab_1545	1.54514	1.46649	1.64449	1.29459	2.87305	1.87989	2.18635	3.46835
metab_1546	4.07259	4.03195	4.10752	4.05947	4.04386	4.04028	4.03599	4.04426
metab_1547	2.53068	2.4018	2.42848	2.41001	2.78969	2.85989	3.08357	3.07313
metab_1549	2.90288	2.86021	2.89052	3.01235	2.26152	2.12409	2.06549	1.72899
metab_1550	3.12306	3.11274	3.11289	3.12229	3.00152	3.05254	2.97118	3.02563
metab_1551	4.48934	4.45738	4.52364	4.4871	4.47958	4.48604	4.44682	4.47408
metab_1552	2.07545	2.17547	2.26329	2.15191	2.50813	2.45529	2.33875	2.63888
metab_1553	0.51426	0.921707	0.941392	1.02076	1.77222	1.7628	1.61835	3.4431
metab_1554	3.40015	3.1537	3.31849	3.20281	3.26135	3.31128	3.23539	3.20236
metab_1555	2.9549	2.77935	2.92627	2.73347	3.03806	2.9784	3.02391	2.96318
metab_1556	2.99551	2.96039	2.98573	2.96367	3.19353	3.19691	3.26009	3.26496
metab_1557	3.90223	3.91637	3.85847	3.77757	4.15126	4.13236	4.00447	3.99576
metab_1559	0.957439	1.2088	1.55982	1.37077	2.01784	1.84904	1.94222	2.24569
metab_1560	1.84162	1.69471	1.79937	1.87088	2.30771	1.70664	2.1254	1.96678
metab_1562	5.46e-05	0.153564	0.465669	1.1147	1.60672	6.99e-05	6.61e-05	2.35132
metab_1563	2.4153	2.15778	2.40222	1.72978	2.29147	2.16585	2.56228	2.2765
metab_1564	2.1804	2.24149	2.20326	2.1715	2.47422	2.29279	2.39131	2.34149
metab_1565	2.53955	2.48892	2.5111	2.57686	2.30923	2.35798	2.32673	2.78835
metab_1566	2.93655	2.82184	2.84415	2.81626	3.33447	3.06592	3.19589	3.06262
metab_1567	3.20941	3.21505	3.14922	3.219	3.04659	3.05522	3.09516	2.99648
metab_1568	2.33187	2.2397	2.32802	2.39724	2.09121	2.06934	2.15474	2.17301
metab_1569	2.42256	2.46969	2.41554	2.4127	2.51367	2.33548	2.63905	2.37491
metab_1570	2.30557	2.27952	2.32154	2.37893	2.74976	2.77024	2.74085	2.57663
metab_1571	2.26819	2.15723	2.42895	2.24559	2.22274	2.08263	2.36929	2.27493
metab_1572	0.109888	1.16512	2.04078	1.42639	1.59141	1.95751	1.85797	2.05978
metab_1574	3.3713	3.38769	3.34246	3.4074	3.21109	3.31199	3.25184	3.21713
metab_1575	2.1772	2.28218	1.99378	2.18364	1.93401	2.02353	2.154	1.94335
metab_1576	2.71158	2.73795	2.96564	3.31809	2.45896	2.48849	2.63964	2.35686
metab_1577	2.96631	2.95349	2.95168	2.94682	3.0211	3.0544	3.00786	2.941
metab_1579	2.03572	2.09192	1.91692	2.00992	2.24619	2.43953	2.35745	2.38143
metab_1580	2.03879	2.28816	1.65839	2.01088	1.80976	2.05174	2.07357	2.36909
metab_1581	2.18901	2.01558	2.10322	2.15266	2.14839	1.8067	1.94314	2.10078
metab_1583	3.38855	3.38366	3.29892	3.38461	3.59474	3.7053	3.62367	3.57826
metab_1584	2.99313	3.01935	2.9366	2.97742	3.03654	3.16952	3.18008	3.00161
metab_1585	1.84555	1.94715	1.86812	1.91453	2.04449	2.22652	2.26808	2.12105
metab_1586	2.61975	2.68467	2.55682	2.65772	2.85179	2.83692	2.87983	3.09766
metab_1587	3.37642	3.30895	3.38073	3.317	2.53958	2.51714	2.67662	2.54469
metab_1588	3.42267	3.41082	3.38172	3.43382	3.28425	3.36378	3.29482	3.25301
metab_1589	3.72829	3.72618	3.68375	3.73425	3.69119	3.70965	3.80427	3.79778
metab_1590	1.9922	2.17496	1.99003	2.04879	2.21386	2.36697	2.26888	2.22629
metab_1591	2.39419	2.44751	2.32313	2.37321	2.03815	2.25491	2.11231	2.15788
metab_1592	2.87254	2.82471	2.75686	2.77492	2.92692	2.97749	2.96197	2.94787
metab_1593	2.12078	2.27207	2.1265	2.28861	2.18362	2.40797	2.37575	2.23671
metab_1594	2.34383	2.33536	2.30294	2.32488	1.95737	2.23414	2.08957	2.09617
metab_1595	2.95963	3.00934	2.90878	2.94666	3.13596	3.28955	2.9504	2.981
metab_1596	4.06933	4.10396	4.01403	3.9898	4.38074	4.39349	4.27859	4.20651
metab_1597	1.76086	1.76238	1.6798	2.05365	1.85508	2.06425	1.88694	1.75434
metab_1598	3.10158	3.12329	3.10645	3.11612	3.10986	3.25671	3.23201	3.0554
metab_1599	3.23325	3.24475	3.23308	3.25549	3.1385	3.26179	3.13039	3.13387
metab_1600	3.08332	3.05782	3.05627	3.16097	3.21536	3.34092	3.14276	3.10491
metab_1601	2.62516	2.74452	2.72613	2.82109	3.01959	3.15107	2.95414	2.92706
metab_1602	2.96078	2.99367	2.98873	2.98279	3.05815	2.99116	2.9806	3.00835
metab_1603	0.0788855	0.0370262	0.404249	0.0178261	1.92313	2.34488	1.91203	1.51995
metab_1604	2.69178	2.62387	2.6105	2.41235	3.28629	2.88957	2.91311	2.61788
metab_1605	2.58606	2.52777	2.53689	2.51912	2.74305	2.79646	2.77032	2.73563
metab_1606	2.70955	2.69027	2.64184	2.66973	2.74516	2.80523	2.77507	2.81286
metab_1607	1.01368	1.08655	0.601493	0.712259	1.24464	1.29464	1.28051	2.73219
metab_1608	2.72882	2.72362	2.74172	2.74659	2.79828	2.92765	2.85571	2.76287
metab_1609	2.89984	2.89223	2.90272	2.79054	2.85872	2.82124	2.81439	2.844
metab_1610	2.44623	2.402	2.3738	2.42677	2.29705	2.48076	2.3725	2.39289
metab_1611	2.41541	2.29498	2.44351	2.32519	2.81443	2.66442	2.67552	2.68718
metab_1612	2.2103	2.06765	2.24258	2.07344	2.56171	2.49767	2.4462	2.46691
metab_1613	2.45102	2.31387	2.44193	2.45831	2.21458	2.19412	2.2191	2.10931
metab_1614	2.24672	2.22568	2.21865	2.22992	2.10488	2.43441	2.44325	2.4285
metab_1615	2.68558	2.65656	2.76518	2.80356	2.73516	2.74839	2.75913	2.62234
metab_1616	2.30606	2.21808	2.35011	2.23904	2.40681	2.48662	2.53477	2.51498
metab_1617	2.71291	2.67512	2.64592	2.56028	2.6674	2.7071	2.84486	2.76961
metab_1618	3.14238	3.14323	3.1075	3.07157	3.4202	3.68065	3.49818	3.59127
metab_1619	2.2578	2.5536	2.29402	2.33165	2.69879	2.71191	2.63293	2.64904
metab_1620	3.07743	3.00826	3.01795	2.94711	3.05755	3.22011	3.18248	3.09519
metab_1621	2.70779	2.73485	2.72095	2.71021	2.98453	2.94685	2.80961	2.77722
metab_1622	2.3582	2.37912	2.40158	2.8691	1.92908	2.27841	2.36233	2.44384
metab_1623	3.30777	3.18825	3.24739	3.28285	3.39996	3.46286	3.38634	3.33378
metab_1624	2.98325	2.97206	2.95304	2.98903	3.12082	3.37671	3.23719	3.30601
metab_1625	2.9125	0.01542	2.59778	2.24525	2.88303	2.93552	2.85459	2.79473
metab_1626	1.36177	1.58266	1.7486	1.75806	2.2124	2.46138	2.28845	2.19835
metab_1627	2.2794	2.39883	2.33099	2.46379	3.17562	2.64457	2.58061	3.77456
metab_1628	2.24326	2.2454	2.17495	2.2164	2.34805	2.44121	2.42727	2.20459
metab_1629	1.90609	2.05206	2.13955	2.10529	2.32207	2.60618	2.40636	2.42116
metab_1630	2.70223	2.73232	2.61812	2.72553	3.07374	3.11355	3.0018	2.98684
metab_1631	3.06728	3.09914	3.1158	3.35332	2.99946	3.18194	3.15497	3.1736
metab_1632	2.82819	2.73964	2.77959	2.87098	2.61933	2.7355	2.68589	2.51737
metab_1633	2.90318	2.88378	2.91021	2.92206	2.79024	2.92704	2.82787	2.93133
metab_1634	2.80766	2.87564	2.79462	2.93862	3.71448	2.94837	3.17467	4.32405
metab_1635	2.76566	2.82947	2.69383	2.71954	2.58294	2.67745	3.00058	2.5903
metab_1636	2.67102	2.67019	2.60679	2.64561	2.60054	2.87058	2.74285	2.71869
metab_1637	2.07431	2.03725	1.69656	1.75273	2.19688	2.26139	2.35842	2.08625
metab_1638	2.06821	1.99064	1.99362	2.44377	2.02754	2.32429	2.13557	1.95422
metab_1639	0.832194	0.746559	0.601187	0.967236	2.42154	0.52922	0.622851	3.09326
metab_1640	2.65871	2.71379	2.57598	2.61346	2.41189	2.64271	2.48814	2.60641
metab_1641	2.26721	2.4293	2.32894	2.28783	2.00015	2.0325	1.96821	2.03924
metab_1642	2.62724	2.63489	2.65088	2.56176	2.58886	2.75149	2.62543	2.6726
metab_1643	2.58291	2.59879	2.68211	2.64275	3.05029	3.1741	3.04867	2.98786
metab_1644	2.42091	2.51816	2.50638	2.49719	2.39268	2.16699	2.37732	2.53194
metab_1646	2.27772	2.16349	2.16284	2.12828	1.66048	2.32498	2.08963	1.70129
metab_1647	3.46842	3.35794	3.41392	3.30166	3.66733	3.67943	3.66679	3.82913
metab_1648	2.7498	2.57353	2.58006	2.41348	2.54462	2.62383	2.55268	2.55618
metab_1650	2.06789	2.25632	2.019	2.07776	2.4008	2.3656	2.34836	2.12049
metab_1651	3.14511	3.22152	3.09316	3.0968	3.20552	3.29875	3.23492	3.09122
metab_1652	2.25969	2.16172	2.15048	2.34815	1.93947	2.35695	2.14613	1.78119
metab_1653	3.86588	3.85083	3.79444	3.81816	4.26442	4.11657	4.10814	4.37691
metab_1654	3.0403	3.0016	3.00679	3.04996	2.87823	2.87133	2.87591	2.8072
metab_1655	2.7295	2.71783	2.74859	2.70684	2.98097	3.02014	3.02115	2.98998
metab_1656	3.4723	0.89558	3.01859	2.71717	3.32129	3.34805	3.27029	3.17382
metab_1657	3.14191	3.12183	3.09671	3.12318	3.15997	3.19958	3.43463	3.11175
metab_1658	2.82596	2.93488	2.8964	2.94354	2.95806	3.12968	3.1823	2.85214
metab_1659	2.29355	2.29226	2.28729	2.3649	2.36021	2.41975	2.29499	2.23123
metab_1660	2.6636	2.69634	2.69981	2.65253	2.81847	2.89235	2.78209	2.82477
metab_1661	2.12971	2.2874	2.07242	2.10638	2.29867	2.45134	2.26257	2.27344
metab_1662	2.1609	2.21536	2.148	2.22218	2.5607	2.57216	2.47781	2.64505
metab_1663	3.12973	2.87144	3.04736	2.79734	3.18126	3.14694	3.20891	3.22513
metab_1664	2.67321	2.65647	2.7331	2.71694	3.25952	3.38054	3.17997	3.55259
metab_1666	1.75816	1.76674	1.74175	1.89108	2.68092	2.70526	2.56307	2.76421
metab_1667	2.72171	2.8223	2.67823	2.75764	2.81315	2.99744	2.95871	2.73759
metab_1668	2.97473	3.01329	2.89312	2.95569	2.98982	3.16019	3.10924	2.99949
metab_1669	2.2932	2.39196	2.31735	2.31538	2.61896	2.72408	2.59869	2.60035
metab_1671	2.84191	2.9139	2.83972	2.85162	3.06209	3.07727	2.98021	3.33342
metab_1672	3.12815	3.00269	3.01562	2.99697	3.18735	3.19084	3.21189	3.15845
metab_1673	1.4975	1.56664	1.63556	1.4665	1.78469	1.91134	1.82177	1.72471
metab_1674	0.900062	0.878624	1.5167	1.22518	1.09049	1.21559	1.18251	0.974676
metab_1675	1.57853	1.6833	1.60629	1.81603	3.14625	2.72617	2.51646	3.7555
metab_1676	3.85418	3.93376	4.04121	3.93007	3.92453	3.33334	3.82707	3.9551
metab_1677	2.17944	2.19152	2.01236	2.4892	3.43523	2.90321	2.80863	4.06595
metab_1678	2.54672	2.40839	2.58215	2.46119	2.9028	3.1456	2.88077	2.9149
metab_1679	1.64187	1.30677	1.763	1.96767	2.50281	2.60493	2.36001	2.31859
metab_1680	3.78725	3.81403	3.74997	3.7798	3.9595	3.99733	3.95027	3.92442
metab_1681	0.936683	0.914989	0.946702	1.43857	2.50309	2.56707	2.45371	2.38743
metab_1683	1.21994	1.01432	1.02721	1.26496	2.03154	2.26488	2.01223	2.24504
metab_1684	2.32534	2.3331	2.37254	2.37826	2.54915	2.75067	2.60313	2.41259
metab_1685	2.38077	1.8727	2.02823	2.39474	2.37207	2.84442	2.37274	2.12224
metab_1686	2.2278	2.02774	2.02828	2.06917	2.27267	2.49665	2.28769	2.16405
metab_1687	1.73193	1.51965	1.78799	1.74086	2.61954	2.93428	2.62126	2.87625
metab_1688	2.8523	2.69759	2.8542	2.90575	2.9529	3.03618	2.92528	2.92175
metab_1689	3.6206	1.01493	3.74615	3.53864	1.89612	2.16992	2.16725	1.76757
metab_1690	2.03286	1.282	1.72594	1.80408	2.23557	2.54925	2.14967	2.1401
metab_1691	3.08708	2.96593	2.97702	2.94405	2.95789	3.10743	2.9542	2.89253
metab_1692	0.626792	0.608117	0.6189	0.623043	2.2538	2.61266	2.30975	1.85254
metab_1693	3.15508	3.32133	3.32519	3.29294	3.24407	2.62411	3.10454	3.28417
metab_1694	2.29729	2.16	2.3089	2.30877	2.34296	2.58955	2.57133	2.03888
metab_1695	2.71831	2.65833	2.71916	2.62133	2.83458	3.03031	2.88556	2.78232
metab_1696	2.62744	2.57251	2.57903	2.75017	3.14365	3.37755	3.03592	3.00527
metab_1698	1.69921	1.483	1.8142	1.66196	2.19733	2.458	2.28234	2.16674
metab_1700	2.96386	2.96321	2.92979	2.9512	3.14029	3.20178	3.18919	3.15099
metab_1701	3.30954	3.23468	3.24242	3.29361	3.46102	3.57867	3.43375	3.37035
metab_1703	2.78661	2.65152	2.72547	2.47893	2.9335	2.93387	2.81175	3.00206
metab_1704	2.75852	1.89818	2.61633	1.98202	2.71031	2.40679	2.15242	2.28165
metab_1705	2.97027	2.99103	2.88058	3.06005	2.97401	3.142	3.01302	2.87956
metab_1706	3.14024	3.08818	3.06322	3.12569	3.08845	3.22297	3.41832	3.02064
metab_1707	2.21003	2.32373	2.07895	2.2721	2.48468	2.61837	2.49452	2.31884
metab_1708	3.71062	3.48391	3.65	3.61055	3.84221	3.9976	3.76518	3.74316
metab_1709	2.72061	2.70358	2.73709	2.54656	2.37124	2.67405	2.58064	2.39814
metab_1710	2.55401	2.63319	2.41679	2.5133	2.7507	2.88884	2.79117	2.63431
metab_1711	1.11101	1.08836	1.18693	1.5264	2.51034	2.81246	2.33693	2.19895
metab_1712	3.03712	3.00179	2.99707	2.71078	3.01799	3.10873	3.03537	2.93854
metab_1713	2.39461	2.27566	2.31385	2.51289	2.49234	2.6937	2.50077	2.41849
metab_1714	3.11748	3.11798	3.14515	3.06179	3.08782	2.71823	3.19846	3.06289
metab_1715	3.66312	1.72967	3.38468	3.27816	3.05743	3.07525	2.97653	2.90196
metab_1717	3.28298	3.44638	3.37935	3.25791	3.2785	3.13603	3.36172	3.32673
metab_1718	2.99105	2.90682	3.05117	3.06412	2.82751	2.86906	2.86092	2.64911
metab_1719	1.95027	1.61941	1.97153	1.56302	1.8622	1.9488	1.91398	1.89749
metab_1720	1.87228	2.81653	3.01039	1.49359	2.57996	2.28489	2.25077	2.32419
metab_1721	3.51723	3.54775	3.51446	3.51334	3.46973	3.41256	3.49589	3.46616
metab_1722	3.05629	3.11904	3.09478	2.99475	2.96747	2.68683	3.02926	3.14299
metab_1723	2.54399	2.58751	2.56584	2.66774	2.31424	2.50807	2.34651	2.3163
metab_1724	4.65171	4.70288	4.69603	4.67117	4.64111	4.49225	4.61771	4.63729
metab_1725	3.04986	3.16585	3.14105	3.04442	3.00379	2.76884	2.89847	2.97127
metab_1726	2.93466	2.93898	2.9426	2.96101	3.02776	3.15368	2.98166	2.96988
metab_1727	2.92219	2.98885	2.84636	2.92893	2.80401	2.37581	2.60129	2.65769
metab_1729	3.12831	3.31705	3.23242	3.1869	3.17279	2.73439	3.07258	3.13444
metab_1730	3.82312	3.88327	3.83582	3.82461	3.81534	3.64413	3.77028	3.78874
metab_1731	3.22781	3.18216	3.38843	3.37321	3.08529	3.20071	3.14766	2.95641
metab_1733	0.928481	0.906842	0.919355	0.924149	2.69987	2.84615	2.662	2.50616
metab_1734	2.42634	2.75613	2.79488	2.521	2.98721	2.78789	2.96519	2.87753
metab_1735	1.94216	2.16859	1.74955	1.4957	2.96993	3.06014	2.93866	2.9466
metab_1736	3.37271	3.18742	3.34819	3.30028	3.09396	3.22412	3.13666	3.09152
metab_1737	3.01268	2.94477	2.84511	2.9983	2.75454	2.71258	2.68838	2.48389
metab_1738	0.28667	0.963002	0.186945	0.765187	2.46101	2.72041	2.50835	2.42626
metab_1740	1.50578	1.48195	2.08205	2.7531	2.1953	2.01094	2.22418	2.25415
metab_1741	1.75066	1.22964	1.3455	1.57873	1.84122	2.22445	1.99068	1.42133
metab_1742	2.55264	2.41383	2.46329	2.41374	2.41754	2.6628	2.53622	2.26061
metab_1743	3.64115	3.64604	3.67826	3.63216	3.68826	3.59397	3.70153	3.6043
metab_1744	1.54119	1.44618	1.56782	1.72711	2.13149	2.15755	2.08305	1.72412
metab_1745	2.29915	2.27198	2.39677	2.24327	2.34153	2.54314	2.48972	1.85686
metab_1747	2.86458	2.75208	2.89787	2.79875	2.98304	3.11699	3.07143	2.91301
metab_1748	1.76514	1.6944	1.78189	1.82197	2.31432	2.51178	2.51941	1.69626
metab_1749	2.44983	2.48193	2.49251	2.45363	2.89184	2.82334	2.86473	2.75889
metab_1750	1.47184	1.11912	1.27242	1.33767	2.05546	1.6458	2.20444	1.17603
metab_1752	2.08797	1.22792	1.8875	2.07989	2.01552	2.1061	2.20889	1.52903
metab_1754	3.54247	3.61183	3.62418	3.18654	3.77097	3.65168	3.70107	3.73482
metab_1755	3.03937	3.00117	3.00956	3.00899	2.87466	2.88871	2.9048	2.81788
metab_1756	1.36583	1.99466	1.16103	1.58858	3.42959	3.41024	3.44592	3.29727
metab_1757	2.97705	3.01115	2.89579	2.90597	2.83415	2.82302	2.86703	2.72918
metab_1758	2.76406	3.01728	3.34352	2.61015	3.17815	3.30769	3.14591	3.11936
metab_1759	2.11472	2.13827	2.25368	2.10383	2.3091	2.37038	2.41642	2.45635
metab_1761	2.09508	2.08226	2.17653	1.90622	2.27612	2.33391	2.32058	2.17081
metab_1762	1.01415	1.23307	1.0048	1.61584	1.5672	1.17633	1.57111	1.689
metab_1763	1.91426	1.67655	2.08969	2.11239	2.21474	2.45147	2.50172	2.31765
metab_1765	2.71418	2.62091	2.63473	2.72506	3.01963	3.15906	3.0753	2.94741
metab_1766	2.38468	1.90444	2.33115	2.07847	2.42311	2.46907	2.14479	2.43007
metab_1767	3.11066	2.99289	3.17826	3.14717	3.03243	3.19664	3.08512	3.09688
metab_1768	0.0531096	1.27835	0.0519296	0.0525469	2.98866	3.156	3.01256	3.00804
metab_1769	2.68367	2.65625	2.68777	2.67918	2.62309	2.70537	2.78071	2.47532
metab_1770	1.97259	1.87302	2.12252	2.15821	2.44317	2.53297	2.46809	2.56904
metab_1771	3.04635	3.06994	3.03119	2.98272	3.02032	2.93524	3.03193	3.065
metab_1773	2.12936	2.34914	2.20741	2.04304	2.04457	2.19231	1.78669	1.99053
metab_1774	2.93651	3.08653	2.78177	2.99015	2.96502	3.17203	3.01758	2.92844
metab_1775	0.302121	0.289957	0.296959	0.299665	2.81891	2.87295	2.94291	2.60154
metab_1777	2.80205	2.81534	2.99628	2.88833	3.02414	2.82751	3.1001	3.05398
metab_1778	2.02868	1.96111	2.02391	1.97408	2.3281	2.50398	2.48643	2.12982
metab_1780	2.27116	2.45819	2.62868	2.5963	2.3493	2.29649	2.04738	2.09323
metab_1781	3.68076	3.78939	3.68233	3.72694	3.82075	3.92488	3.84018	3.73567
metab_1783	2.19249	1.86854	2.21402	2.16265	1.81336	1.94465	1.856	1.26519
metab_1784	3.0053	3.00055	2.96923	3.18485	2.75593	3.40075	2.8596	2.76089
metab_1785	1.58522	1.66057	1.2406	1.33603	2.91111	2.92779	2.73488	2.64019
metab_1787	2.18645	2.39567	2.49613	2.62894	3.42464	3.42686	3.22835	3.15972
metab_1788	2.00433	1.80987	2.10561	2.15345	3.04499	3.07978	2.8509	2.79067
metab_1790	1.39054	1.76684	1.3806	1.67803	2.58773	2.72433	2.65103	2.61429
metab_1791	2.80851	2.74863	2.7633	2.74712	2.89372	2.97079	2.86524	2.75977
metab_1792	2.64568	2.7893	2.72707	2.76256	2.71541	2.82168	2.73085	2.34095
metab_1793	2.95435	2.89935	2.90016	2.94145	3.16001	3.29655	3.16378	3.01616
metab_1794	1.62277	0.964477	1.63073	0.776653	1.4587	1.74272	1.90104	2.63973
metab_1795	0.524503	0.507393	0.517265	0.521064	1.83307	2.32137	1.77049	1.98146
metab_1796	3.14299	3.26228	3.21262	2.99853	2.77347	2.89096	2.89522	2.73874
metab_1797	2.59307	2.65513	2.56127	2.61592	2.95087	3.05385	2.90283	2.89301
metab_1798	3.41089	3.51716	3.4807	3.28611	3.19842	3.30175	3.23493	3.17199
metab_1799	2.41681	2.5254	2.26037	2.49981	2.63549	2.75516	2.63756	2.43527
metab_1800	3.63056	3.61725	3.63717	3.60104	3.75786	3.70022	3.83865	3.69643
metab_1802	3.78273	3.84965	3.87332	3.79746	3.86405	3.82947	4.02039	3.83791
metab_1803	2.04476	2.13753	1.74801	2.09018	2.32712	2.51334	2.47744	2.3311
metab_1804	3.50804	3.51297	3.46897	3.5508	3.63861	3.49572	3.467	3.8231
metab_1805	2.5833	2.47115	2.47023	2.75899	2.53094	2.86269	2.33693	2.27977
metab_1806	2.29443	2.20477	2.09082	2.27486	3.0565	3.17256	3.11283	3.00366
metab_1807	1.09983	1.45077	0.872715	1.73533	2.54267	2.96452	2.32044	2.23407
metab_1808	2.6905	2.71477	2.66758	2.62945	2.51087	2.5537	2.42032	2.30767
metab_1809	2.70222	2.73669	2.63694	2.75829	2.71072	3.05153	2.72233	2.49349
metab_1810	3.00704	3.02453	2.99357	3.04699	3.47118	3.51458	3.43147	3.48215
metab_1812	3.45068	3.41821	3.41579	3.41549	3.48682	3.54275	3.53816	3.46887
metab_1813	2.79639	2.76771	2.78644	2.76081	2.97455	2.95568	3.00187	2.84318
metab_1814	2.69717	2.6703	2.69916	2.65181	2.88639	2.91353	2.87972	2.89685
metab_1815	2.61575	2.64374	2.68738	2.67738	2.88624	2.81786	2.91379	2.8785
metab_1816	3.12875	3.10628	3.13027	3.1306	3.54826	3.57505	3.48472	3.52114
metab_1817	2.3831	2.36793	2.39113	2.45893	3.2516	2.81789	2.89952	2.85511
metab_1818	2.62788	2.72903	2.54717	2.65386	2.84392	2.87164	2.72658	2.64977
metab_1819	2.31014	2.24336	2.22996	2.32309	2.44634	2.57844	2.50987	2.47189
metab_1821	2.99763	2.97362	2.98573	2.98459	3.091	3.08873	3.15797	3.12572
metab_1822	2.17403	2.27713	2.2224	2.18796	2.28511	2.30307	2.12118	2.05746
metab_1823	3.34902	3.25784	3.30041	3.35339	3.60993	3.66564	3.57749	3.60125
metab_1824	2.61859	2.58754	2.67872	2.69789	2.99488	3.03559	3.0659	3.06991
metab_1825	2.68303	2.53679	2.59575	2.58986	2.76923	2.88207	2.86787	2.69136
metab_1826	2.76281	2.75503	2.73106	2.75106	2.91321	2.9636	2.98082	2.92532
metab_1827	3.20962	3.18218	3.16007	3.2212	3.27475	3.29236	3.35418	3.18062
metab_1829	3.34173	3.29637	3.31676	3.31255	3.39111	3.47574	3.46218	3.34856
metab_1830	2.38737	2.17337	2.34663	2.30026	2.95802	2.98533	2.78929	2.87749
metab_1831	2.8134	2.88394	2.90556	2.88288	2.73724	2.83392	2.90238	2.79243
metab_1832	2.65725	2.64939	2.62518	2.70903	3.07077	3.04044	3.03426	3.17375
metab_1833	3.82245	3.83345	3.86375	3.85331	3.87692	3.86603	3.97474	3.82465
metab_1834	2.76431	2.77985	2.78373	2.82435	2.76863	2.72917	2.817	2.77064
metab_1835	1.98264	1.58895	2.10866	2.0851	2.2261	2.24339	2.1182	2.15725
metab_1836	2.39736	2.47623	2.43913	2.50349	2.54053	2.64363	2.51149	2.44244
metab_1837	2.87562	2.78296	2.81313	2.76543	2.74567	2.83919	2.82809	2.62281
metab_1838	2.51862	2.2213	1.97528	2.1905	2.42597	2.59483	2.46252	2.43938
metab_1839	1.97708	1.93098	2.07153	2.15163	2.44833	2.45134	2.45565	2.48065
metab_1840	3.3205	3.27003	3.29679	3.31551	3.42245	3.45986	3.466	3.28587
metab_1841	3.36925	3.31977	3.34292	3.3284	3.46003	3.47421	3.41437	3.35338
metab_1842	2.17002	2.19691	2.2654	2.30221	2.47754	2.51716	2.53674	2.46838
metab_1844	3.69694	3.73532	3.68278	3.70543	3.71034	3.70868	3.73809	3.77839
metab_1845	0.0196654	0.0186047	0.0192119	1.00843	1.89508	0.0250591	0.850935	2.60933
metab_1846	0.324747	0.472779	0.597078	1.42454	2.01507	1.02176	1.52027	2.63796
metab_1848	2.35181	2.26486	2.23217	2.3495	2.05962	2.69014	2.24591	2.3332
metab_1849	2.64171	2.66969	2.81356	2.86153	3.19631	3.1021	3.14379	3.29669
metab_1850	3.58733	3.57479	3.64984	3.65894	3.75988	3.67242	3.80572	3.78711
metab_1851	3.10772	2.87225	2.92129	3.09988	2.57862	3.16161	2.67605	1.97431
metab_1852	2.91916	2.81405	2.88908	3.0138	2.91936	3.06695	2.98172	3.24451
metab_1853	3.1864	3.07655	3.19617	3.19712	3.01353	2.96975	3.21159	2.95787
metab_1854	1.45594	1.43221	1.44594	1.45119	1.62267	1.7521	1.54277	1.94122
metab_1855	3.54837	3.61332	3.56625	3.56436	3.47536	3.42879	3.51313	3.43352
metab_1856	3.07643	3.1455	3.05254	3.11461	3.16065	3.28464	3.17818	3.09235
metab_1858	2.03124	1.66894	1.97734	2.07633	3.06755	3.0095	3.06994	3.13424
metab_1859	2.54841	2.26207	2.45844	2.40086	2.72315	2.71473	2.8272	2.70545
metab_1861	3.08718	3.10245	3.10524	3.1584	3.35036	3.33308	3.36914	3.352
metab_1862	2.67807	2.60444	2.62084	2.66605	2.99641	2.87428	2.8696	2.92754
metab_1863	1.78424	1.09179	1.3429	0.791719	2.70301	2.79001	2.69437	2.73514
metab_1864	1.90876	2.65543	2.27654	2.50317	2.81026	2.9087	2.8332	2.75173
metab_1865	2.45611	2.41016	2.429	2.42394	2.63037	2.71074	2.58185	2.51927
metab_1871	3.19768	3.1422	3.07672	3.19666	3.08327	3.49884	3.05508	2.86025
metab_1872	3.00034	2.87954	3.01851	2.85608	2.94638	2.96701	2.93711	3.10206
metab_1873	3.13245	2.98862	3.07661	2.95073	3.10336	3.12678	3.17809	3.18585
metab_1874	1.05988	2.50797	1.46152	1.05539	1.77389	1.15945	1.85336	1.89663
metab_1876	3.59822	3.58954	3.60094	3.6217	3.57719	3.55661	3.65855	3.57122
metab_1877	3.89634	3.89491	3.89917	3.90214	3.92695	3.94953	4.01226	3.90494
metab_1878	0.402693	0.83094	0.396461	0.39973	2.51284	2.53833	2.50432	2.52509
metab_1879	1.34924	1.41022	1.51281	1.34455	2.66791	2.54122	2.5257	2.47842
metab_1880	3.41061	3.46024	3.47873	3.47687	3.49119	3.44303	3.59309	3.51106
metab_1881	2.95775	2.90341	2.91434	3.07771	3.71874	3.59897	3.61794	3.56076
metab_1882	3.47967	3.46924	3.50456	3.47745	3.62785	3.5331	3.60681	3.66943
metab_1883	2.96079	2.88654	2.95832	3.02282	3.17285	3.10342	3.15463	3.24899
metab_1884	3.41427	3.41925	3.41638	3.40035	3.32735	3.4042	3.33871	3.27686
metab_1885	4.04653	3.99231	4.0376	4.0261	4.04558	4.04682	4.09846	4.07947
metab_1886	3.54895	3.52388	3.56197	3.59896	3.67714	3.67722	3.69627	3.68433
metab_1887	3.10456	3.06523	3.07536	2.97232	2.90913	2.95146	2.98057	2.96641
metab_1888	3.50926	3.49213	3.51624	3.52178	3.61343	3.59169	3.63218	3.63319
metab_1889	3.64386	3.68626	3.64598	3.59661	3.4718	3.55825	3.44796	3.43922
metab_1890	2.9494	3.03868	2.92086	2.81192	2.61103	2.71212	2.67588	2.68218
metab_1891	2.94732	2.94684	2.99142	2.95185	3.00852	3.05377	3.06652	3.09628
metab_1892	3.16612	3.15398	3.17372	3.18542	3.11828	3.20974	3.1932	3.2485
metab_1893	3.69323	3.66169	3.68354	3.6918	3.67464	3.71895	3.7683	3.67432
metab_1894	2.8056	2.91613	2.85121	2.84923	2.7893	2.84317	2.82895	2.64986
metab_1895	3.45707	3.44468	3.46319	3.50783	3.51598	3.57554	3.58181	3.55404
metab_1896	3.18213	3.0761	3.11034	3.18247	3.21914	3.23865	3.2915	3.24566
metab_1897	2.73059	2.72791	2.72263	2.73432	2.66228	2.79604	2.85972	2.7612
metab_1898	2.79578	2.775	2.73222	2.82423	2.85834	2.8906	2.92338	2.93375
metab_1899	2.59091	2.51057	2.61743	2.64172	2.82476	2.86168	2.86912	2.96495
metab_1900	1.77904	1.69699	1.82491	1.72916	2.56667	2.59986	2.56029	2.68886
metab_1901	3.24204	3.20562	3.23132	3.19576	3.20919	3.21943	3.25526	3.27336
metab_1902	3.30865	3.32484	3.32447	3.27496	3.24678	3.264	3.30421	3.24834
metab_1903	2.96434	2.88839	3.25293	3.24156	2.91682	2.49725	2.93197	2.41476
metab_1904	3.12658	3.07923	3.09599	3.09274	3.15148	3.15104	3.19545	3.16618
metab_1905	3.01589	3.0542	3.01902	2.90255	1.90866	2.02716	1.91192	2.06815
metab_1907	3.1413	3.06831	3.10861	3.14413	3.15643	3.17061	3.22573	3.19206
metab_1908	3.48008	3.45407	3.49711	3.46643	3.52299	3.51052	3.5595	3.56324
metab_1909	3.01945	3.01937	3.05642	3.04787	3.03573	3.08723	3.05848	3.13129
metab_1910	3.2576	3.25308	3.26038	3.2463	3.22017	3.24106	3.29166	3.28874
metab_1911	2.99342	2.92132	2.96496	2.99573	3.1782	3.11816	3.20478	3.21268
metab_1912	3.19899	3.15606	3.23582	3.22783	3.30459	3.2534	3.30552	3.28592
metab_1913	3.02526	2.93492	2.9669	2.98044	3.08809	3.14762	3.13051	3.08828
metab_1914	3.6193	3.62115	3.60979	3.62613	3.61226	3.61591	3.70799	3.61031
metab_1915	2.58013	2.50705	2.57685	2.62438	2.73488	2.55578	2.72114	2.86435
metab_1916	1.2084	0.762997	0.678798	0.987217	1.06589	1.04771	0.926882	1.09128
metab_1917	3.01899	2.99071	3.02183	2.99747	3.03334	3.13203	3.17926	3.12421
metab_1918	2.20221	2.35247	2.07001	2.02389	2.00525	2.02115	2.03368	1.7485
metab_1919	3.7676	3.73705	3.78487	3.67923	3.72999	3.70301	3.77141	3.78418
metab_1920	3.53238	3.50449	3.52708	3.52141	3.57178	3.55864	3.6211	3.62245
metab_1922	2.568	2.58378	2.60924	2.62641	2.58874	2.53959	2.58914	2.605
metab_1923	2.67289	2.66988	2.63857	2.60598	2.77027	2.73077	2.80021	2.79118
metab_1924	3.0646	3.08678	3.09076	3.09581	2.98221	2.95352	3.07436	3.0084
metab_1925	2.6628	2.646	2.71795	2.69638	2.88263	2.79134	2.82317	2.93915
metab_1926	2.46188	2.44916	2.57585	2.55514	2.38636	2.27565	2.49984	2.50208
metab_1927	3.4759	3.46216	3.47969	3.48723	3.58344	3.55676	3.59471	3.60182
metab_1928	2.01661	1.97225	2.19028	2.18629	2.01782	1.92663	1.96247	2.1409
metab_1929	2.13866	2.19566	2.26347	2.23765	2.23499	1.99586	2.31102	2.30441
metab_1930	2.73409	2.82971	2.87905	2.80268	2.89145	2.69051	2.81518	2.85458
metab_1931	2.40554	2.32862	2.47337	2.44617	2.54864	2.31672	2.5365	2.77772
metab_1932	2.70248	2.67959	2.78719	2.73099	3.11472	2.99078	3.0379	3.10463
metab_1933	2.05383	1.79397	2.09269	2.12161	2.68476	2.40579	2.63559	2.55591
metab_1934	1.64179	1.62985	1.81905	1.56675	1.88573	1.54116	1.87236	2.36688
metab_1935	3.02931	3.00779	3.09142	3.07607	3.22282	3.23471	3.26982	3.26591
metab_1936	2.84148	2.88665	2.6185	2.82135	2.67697	3.17181	2.67351	2.22684
metab_1937	2.97746	3.00971	2.97938	2.97948	3.07637	3.07343	3.0313	2.89067
metab_1939	1.72489	1.57151	1.19117	0.27086	0.337682	0.0108417	0.0102526	0.00921709
metab_1940	2.30381	2.2009	2.35368	2.01819	3.16835	3.00198	3.10349	3.08036
metab_1941	3.13422	3.06749	3.11824	2.95889	3.05705	3.03707	3.11206	3.08722
metab_1942	3.6961	3.63596	3.67656	3.63702	3.74927	3.71376	3.77799	3.78613
metab_1943	2.34595	2.30142	2.36338	2.29896	2.57835	2.52514	2.60168	2.62722
metab_1944	1.82347	1.81341	2.06655	1.9353	1.95474	1.90069	2.04219	2.07369
metab_1945	2.37255	2.30757	2.45683	2.25761	2.61676	2.56064	2.65277	2.67372
metab_1947	3.11713	3.03431	3.10784	2.9355	3.07869	3.02209	3.10163	3.031
metab_1948	3.40718	3.40916	3.38541	3.30405	3.40843	3.45532	3.45288	3.37894
metab_1949	3.6767	3.61786	3.62212	3.60436	3.67558	3.69813	3.73968	3.68552
metab_1950	3.42308	3.37818	3.42701	3.39955	3.48034	3.44895	3.49075	3.51727
metab_1951	2.60361	2.36375	2.46687	2.21246	2.85093	2.86081	2.83044	2.89206
metab_1952	3.58009	3.54307	3.56182	3.5598	3.54135	3.53509	3.63055	3.53057
metab_1953	3.39327	3.32281	3.41064	3.33619	3.45468	3.44422	3.48827	3.49189
metab_1954	2.42013	2.31548	2.41724	2.16717	2.56753	2.57941	2.61883	2.57405
metab_1955	2.40023	2.42842	2.35928	2.41602	2.35867	2.33379	2.31906	2.22621
metab_1956	3.10001	3.01552	3.06341	3.08881	3.13578	3.16582	3.17528	3.15689
metab_1957	3.20872	3.09992	3.16826	3.02866	3.16379	3.15857	3.23448	3.23512
metab_1958	3.31018	3.16824	3.22791	3.22941	3.17153	3.18825	3.23319	3.19895
metab_1959	3.15398	3.05013	3.12123	3.04715	3.12261	3.01022	3.13518	3.11119
metab_1960	3.39576	3.30401	3.40151	3.33694	3.37537	3.38354	3.42837	3.45296
metab_1961	3.21567	3.08825	3.20884	3.00947	3.09977	3.04204	3.11518	3.11806
metab_1962	1.95338	2.04056	1.88562	2.02221	2.11762	2.17364	1.9116	2.02594
metab_1963	3.01463	2.96001	3.0604	2.98153	2.97186	2.94038	3.00429	3.08096
metab_1964	2.91877	2.81269	2.94203	2.82003	2.63983	2.60248	2.6787	2.7215
metab_1965	3.63647	3.5672	3.64375	3.5604	3.60535	3.59428	3.61164	3.63994
metab_1966	3.56666	3.47973	3.55883	3.51359	3.6385	3.60139	3.67368	3.64289
metab_1967	2.40767	2.36011	2.46664	2.41023	2.59634	2.52706	2.52673	2.63005
metab_1968	3.3779	3.35419	3.40765	3.36805	3.39233	3.3681	3.43484	3.42312
metab_1969	1.20519	1.67988	1.00925	1.61334	1.80383	1.70054	1.66033	1.31366
metab_1970	2.86404	2.77862	2.89353	2.78456	2.93731	2.87263	2.88888	3.01083
metab_1971	2.50214	2.69698	2.44815	2.59736	2.60256	2.74181	2.62183	2.50636
metab_1972	3.14189	3.12462	3.20609	3.10434	3.23543	3.17984	3.20661	3.26224
metab_1973	2.22123	2.09166	2.15137	2.11677	2.21939	2.25222	2.2862	2.34631
metab_1974	2.40994	2.35291	2.38767	2.26237	2.11001	2.20831	2.11714	2.17044
metab_1975	3.44255	3.36561	3.44821	3.39171	3.40668	3.40056	3.4388	3.44791
metab_1976	3.32392	3.25572	3.31793	3.24637	3.33857	3.31408	3.3493	3.39702
metab_1977	3.32397	3.27635	3.30666	3.27006	3.32164	3.23345	3.32717	3.33402
metab_1978	2.78322	2.48401	2.4789	2.34787	2.44443	2.41685	2.6405	2.65541
metab_1979	2.68431	2.7584	2.76099	2.69838	2.89072	2.82557	2.83311	2.78398
metab_1980	2.91262	2.76991	2.88338	2.78678	2.58753	2.54599	2.70333	2.58791
metab_1981	1.8182	1.74137	1.91328	1.60378	2.28061	2.07798	2.31164	2.51684
metab_1982	3.13598	3.0894	3.00392	3.01261	2.657	2.48261	2.63068	2.78511
metab_1983	2.66049	2.57973	2.71598	2.60928	2.21688	2.01758	2.11538	2.15819
metab_1984	3.75598	3.70589	3.74028	3.72282	3.68153	3.73148	3.72056	3.70921
metab_1985	2.57495	2.57985	2.61566	2.65215	3.76588	3.76366	3.81884	3.65599
metab_1986	2.4548	2.41795	2.51466	2.47815	3.09169	3.01683	3.15342	3.0385
metab_1987	2.98233	2.95644	3.03446	2.96691	3.02499	2.9956	2.96797	3.07634
metab_1990	2.7261	2.66273	2.74587	2.68935	3.19369	3.053	3.04741	3.19904
metab_1991	2.31788	2.41087	2.32092	2.25461	2.2087	2.14924	2.20219	1.91011
metab_1992	3.4846	3.39037	3.51949	3.45249	3.77621	3.61008	3.61825	3.77933
metab_1993	2.94169	2.87176	2.92877	2.89123	2.88031	2.88741	2.85844	2.87043
metab_1994	3.94177	3.88243	3.94333	3.88489	3.89731	3.8857	3.90922	3.95193
metab_1995	3.34915	3.23641	3.32484	3.29175	3.27071	3.2924	3.32458	3.34134
metab_1996	2.86741	2.73245	2.82008	2.74323	2.56766	2.5587	2.65726	2.68291
metab_1997	2.70395	2.53742	2.73229	2.60829	2.70315	2.56711	2.7058	2.71722
metab_1998	2.79987	2.60839	2.78428	2.81285	2.75491	2.80891	2.79709	2.85507
metab_1999	2.83629	2.79044	2.85398	2.86769	2.5606	2.49867	2.64643	2.60529
metab_2000	2.30414	2.24866	2.345	2.07726	2.18497	2.04632	2.20003	2.1739
metab_2001	2.15889	2.02882	2.1957	2.17816	1.79988	1.8508	2.12843	1.91606
metab_2002	2.7502	2.51049	2.65242	2.65378	2.53878	2.57805	2.63833	2.75891
metab_2003	3.60383	3.50099	3.59535	3.57118	3.51405	3.52259	3.53838	3.54055
metab_2004	2.75601	2.61701	2.78031	2.75209	2.69979	2.71447	2.76519	2.84224
metab_2006	2.34382	2.10801	2.20939	2.35386	2.3151	2.22896	2.37099	2.58589
metab_2007	3.3898	3.32058	3.43224	3.43831	3.43318	3.3929	3.41923	3.47013
metab_2008	2.60384	2.59604	2.63361	2.5631	2.41367	2.39971	2.35457	2.51166
metab_2009	3.32324	3.21193	3.33245	3.26193	3.14912	3.11597	3.19408	3.22498
metab_2010	3.5421	3.43216	3.50464	3.45799	3.5216	3.47183	3.55998	3.62898
metab_2011	3.75192	3.60349	3.71218	3.66008	3.64271	3.84452	3.80472	3.75088
metab_2012	3.53746	3.3471	3.45078	3.4214	3.21923	3.24305	3.17925	3.25687
metab_2013	3.39713	3.32057	3.39958	3.34235	3.26831	3.26929	3.32467	3.35964
metab_2014	3.36023	3.28451	3.30441	3.51907	3.21954	3.26322	3.20274	3.1884
metab_2015	2.97967	2.90049	3.03132	2.97485	3.10329	3.08243	3.15011	3.17441
metab_2016	2.66669	2.45583	2.67023	2.67171	2.65063	2.62076	2.72736	2.74737
metab_2017	4.0772	3.97043	4.06464	4.01654	4.01111	4.00223	4.0581	4.09562
metab_2018	2.48189	2.53127	2.65634	2.48799	2.44538	2.37116	2.4909	2.49274
metab_2019	1.7719	1.84598	1.98292	1.9949	2.13737	2.2318	2.185	2.29242
metab_2020	2.63992	2.48839	2.62665	2.53638	2.63558	2.6158	2.69065	2.74975
metab_2023	2.74678	2.69943	2.75484	2.72637	2.57926	2.55183	2.73022	2.57483
metab_2024	3.53155	3.45525	3.50536	3.53846	3.52488	3.53876	3.55888	3.55981
metab_2025	2.53145	2.54895	2.54976	2.54555	2.40812	2.48457	2.3738	2.43901
metab_2026	3.73869	3.61385	3.6894	3.69556	3.73608	3.70887	3.7462	3.76096
metab_2027	1.88406	1.84105	1.94835	1.86409	1.92844	1.96863	1.9511	2.047
metab_2029	1.81462	1.66206	1.82627	1.7487	2.01244	1.9423	2.00344	2.07142
metab_2030	2.89981	2.92051	2.87131	2.89548	2.69022	2.84028	2.72348	2.62833
metab_2031	3.42136	3.32661	3.41142	3.38923	3.43662	3.46328	3.49549	3.46976
metab_2032	3.24565	3.12785	3.21274	3.15002	3.26943	3.25531	3.34241	3.30745
metab_2033	3.14077	2.96768	3.03529	3.0164	2.87586	2.94644	2.9801	2.88636
metab_2034	2.65173	2.54432	2.61592	2.52606	2.38753	2.53383	2.56121	2.422
metab_2035	2.23032	2.32402	2.23587	2.36724	2.41643	2.47181	2.44327	2.25634
metab_2036	3.77497	3.67004	3.78572	3.72974	3.85834	3.78285	3.81621	3.85285
metab_2037	2.4982	2.47295	2.50657	2.48537	2.26387	2.49399	2.48099	2.13755
metab_2038	2.91409	2.81073	2.89707	2.83606	2.81703	2.82068	2.91327	2.98346
metab_2039	2.28044	2.20244	2.25378	2.21588	2.05031	2.41049	2.43168	2.02769
metab_2040	3.37937	3.27039	3.36003	3.31121	3.54362	3.45043	3.4938	3.58144
metab_2041	1.68139	1.28771	1.70247	1.4958	2.46756	2.13889	2.3001	2.24805
metab_2043	2.15612	1.94405	1.99947	1.886	1.8446	1.95251	2.04518	1.90872
metab_2044	2.97045	2.82519	2.9222	2.91244	3.12051	3.04394	3.10092	3.14191
metab_2045	2.75111	2.64651	2.74206	2.69332	2.55029	2.72048	2.73343	2.64864
metab_2046	3.73482	3.64652	3.80042	3.66404	3.60034	3.62272	3.66555	3.69929
metab_2047	2.97124	2.81817	3.02469	2.94821	3.14646	3.12875	3.19018	3.18109
metab_2048	3.03371	2.85084	2.94303	2.92286	3.10786	3.02717	3.11741	3.17357
metab_2049	3.29701	3.22671	3.33336	3.23638	3.17757	3.17569	3.20498	3.27752
metab_2050	3.01217	2.84299	3.01069	2.94953	3.03671	2.91648	3.09815	3.07907
metab_2051	3.52162	3.44747	3.56513	3.49836	3.65561	3.65017	3.7018	3.7099
metab_2052	3.20193	3.07136	3.18125	3.11065	3.08398	3.09276	3.14587	3.1347
metab_2053	2.22296	1.99406	2.19184	2.08277	1.98241	2.01855	2.03093	2.05969
metab_2054	3.20965	2.99811	3.13559	3.06199	2.97299	2.96674	3.04432	3.07168
metab_2055	2.9344	2.96286	2.92726	2.90925	2.68666	2.79443	2.70642	2.68366
metab_2056	3.96122	3.98477	3.96846	3.98825	3.89466	3.95706	3.86874	3.81305
metab_2057	2.58271	2.41115	2.51961	2.55207	1.82631	1.94019	1.89308	1.97269
metab_2058	3.27725	3.25791	3.27313	3.27679	3.11799	3.19883	3.17818	3.0911
metab_2059	3.58782	3.46127	3.61655	3.5387	3.62561	3.60562	3.6565	3.66449
metab_2060	3.2557	3.17121	3.26014	3.19529	3.20324	3.23491	3.24996	3.32045
metab_2061	2.87017	2.87053	2.95112	2.89222	2.80241	2.85561	2.80347	2.83726
metab_2062	1.97984	1.70656	1.99841	1.68676	1.99852	1.76634	2.03113	2.19108
metab_2063	2.69366	2.67271	2.74607	2.61892	2.70087	2.76361	2.77935	2.8735
metab_2064	3.46697	3.32592	3.4411	3.38864	3.34135	3.35368	3.39581	3.46933
metab_2065	2.54084	2.39678	2.57276	2.43503	2.63786	2.58129	2.71129	2.80821
metab_2068	2.23623	2.06143	2.22356	2.13358	2.24547	2.33728	2.35843	2.44614
metab_2069	3.0322	2.87976	3.04088	2.99395	3.09694	3.08134	3.15598	3.17286
metab_2070	3.37156	3.27809	3.38763	3.30021	3.24872	3.28027	3.31347	3.4013
metab_2071	2.1323	2.20941	2.28156	2.24916	2.32048	2.46066	2.40543	2.26382
metab_2072	2.05649	1.91347	2.38686	2.13656	2.32933	2.33043	2.39636	2.54904
metab_2073	3.34086	3.11098	3.32736	3.19228	3.29502	3.24844	3.41319	3.53771
metab_2074	2.46891	2.35018	2.67655	2.50411	2.44818	2.42133	2.54876	2.64604
metab_2075	1.87126	1.86591	2.08352	2.04909	2.02714	2.1374	2.08036	2.0155
metab_2076	2.97607	2.81099	3.02267	2.96092	3.01113	3.02531	3.12687	3.17472
metab_2077	3.91639	3.94638	3.86036	3.89486	3.73238	3.84764	3.74423	3.67303
metab_2078	2.81303	2.77193	2.89315	2.86402	2.79741	2.85302	2.92646	2.9153
metab_2079	3.31927	3.24663	3.24772	3.4299	3.15299	3.17492	3.11974	3.08787
metab_2080	3.45173	3.30277	3.39143	3.34516	3.21785	3.29575	3.36091	3.34951
metab_2081	2.14251	2.01019	2.07659	1.94462	2.08997	2.15726	2.15041	2.35541
metab_2082	3.5861	3.45261	3.58313	3.48915	3.53095	3.51514	3.5697	3.61688
metab_2083	2.69476	2.31031	2.69622	2.72021	2.62207	2.6867	2.86767	2.93097
metab_2084	3.19574	3.03579	3.19814	3.1328	3.1937	3.13558	3.22124	3.25759
metab_2085	2.52152	2.29042	2.56479	2.52029	2.59535	2.54008	2.68205	2.74251
metab_2086	3.23875	3.14399	3.22764	3.23384	3.21351	3.21532	3.28057	3.27472
metab_2087	2.99953	2.90529	2.99527	2.89711	2.9398	2.84813	2.964	2.96247
metab_2088	3.55094	3.53553	3.53446	3.55245	3.43602	3.52443	3.45727	3.38083
metab_2089	3.66362	3.48608	3.61738	3.49198	3.52035	3.50153	3.58614	3.67009
metab_2090	2.7221	2.43855	2.70932	2.57018	2.62248	2.54206	2.73583	2.82597
metab_2092	3.65277	3.43438	3.63994	3.55169	3.62078	3.58194	3.73143	3.79068
metab_2093	3.78523	3.61332	3.74544	3.65227	3.70664	3.66422	3.75737	3.84269
metab_2094	2.9473	2.77659	2.98626	2.83014	3.05218	2.98629	3.05929	3.17625
metab_2095	2.46438	2.13624	2.50606	2.30056	2.6675	2.54297	2.70631	2.80157
metab_2096	3.41484	3.24377	3.42501	3.32004	3.41894	3.35167	3.43067	3.49705
metab_2097	2.94901	2.81851	2.91763	2.84918	2.86261	2.8606	2.9262	2.97787
metab_2098	2.31825	2.01297	2.25637	2.0387	2.25247	2.21623	2.34557	2.48384
metab_2099	2.33786	2.16205	2.34992	2.27056	2.65034	2.61484	2.64462	2.68738
metab_2100	3.54369	3.37109	3.52494	3.43869	3.47723	3.41626	3.53967	3.63107
metab_2101	2.06208	1.83594	2.00834	2.06188	2.14035	2.0627	2.16133	2.289
metab_2102	3.52332	3.52548	3.54308	3.55738	3.45881	3.54274	3.47728	3.41945
metab_2103	2.98021	2.76445	2.97284	2.84151	2.95666	2.91984	3.0131	3.18694
metab_2104	2.73153	2.46328	2.80391	2.64892	2.83683	2.78497	2.90988	3.03369
metab_2105	2.7112	2.58482	2.77111	2.74857	2.79014	2.79332	2.84118	2.88378
metab_2106	2.36258	2.0148	2.35747	2.26675	2.42547	2.34597	3.1075	2.63183
metab_2107	2.60024	2.40228	2.54034	2.47778	2.47183	2.47152	2.49266	2.60627
metab_2108	2.9734	2.92251	2.95572	2.83178	2.81256	2.82221	2.84946	2.85237
metab_2109	3.36965	3.21383	3.37887	3.26792	3.3229	3.26968	3.35571	3.41502
metab_2110	2.70695	2.61382	2.67683	2.61063	2.57538	2.56994	2.60226	2.71839
metab_2111	3.39668	3.38062	3.44398	3.42354	3.36955	3.39746	3.42954	3.37455
metab_2112	3.10752	3.09834	3.1116	3.11082	3.06366	3.0837	3.12701	3.03443
metab_2113	3.52445	3.37248	3.49453	3.54646	3.53484	3.37939	3.50535	3.7062
metab_2114	2.747	2.50898	2.74519	2.60567	2.74926	2.6738	2.75497	2.96907
metab_2115	2.64499	2.49574	2.66575	2.61727	2.5992	2.64533	2.74929	2.81649
metab_2116	3.36865	3.28658	3.33661	3.30354	3.24066	3.28949	3.29578	3.26419
metab_2117	3.51313	3.43864	3.47715	3.46119	3.34361	3.38107	3.3715	3.38201
metab_2118	2.90472	2.77394	2.88229	2.79012	2.85857	2.80697	2.93031	3.24717
metab_2119	2.95936	2.79538	2.95108	2.87163	2.98992	2.85471	3.05312	3.14983
metab_2120	3.45268	3.28896	3.44605	3.32195	3.39806	3.32939	3.48424	3.59842
metab_2121	2.69427	2.59422	2.71268	2.60083	2.50671	2.5791	2.5231	2.55724
metab_2122	2.74639	2.61399	2.79412	2.59045	2.79328	2.66285	2.76134	2.88872
metab_2123	3.3942	3.42947	3.37751	3.39305	3.19628	3.31509	3.20235	3.08798
metab_2124	2.75161	2.57444	2.77756	2.68542	2.77909	2.77461	2.86493	2.92128
metab_2125	2.6496	2.36806	2.56848	2.47214	2.47608	2.44468	2.63428	2.724
metab_2126	2.04981	2.02613	2.2553	2.24014	2.85582	2.82575	2.7411	2.70322
metab_2127	2.88832	2.7335	2.81513	2.66071	2.49906	2.57741	2.6669	2.7358
metab_2128	3.05143	2.90888	3.11144	3.01529	3.08138	3.02488	3.09737	3.13445
metab_2129	2.52288	2.33888	2.48261	2.39016	2.30813	2.26986	2.339	2.42706
metab_2130	3.09988	2.88861	3.15167	3.00211	3.22587	3.14257	3.2493	3.27547
metab_2131	2.41839	2.44	2.55886	2.61427	3.36408	3.38052	3.26667	3.15529
metab_2132	2.85978	2.86867	2.94337	2.95148	3.17617	3.19619	3.13478	3.08012
metab_2133	2.59019	2.3834	2.55921	2.45602	2.45423	2.3914	2.50951	2.58153
metab_2134	2.65122	2.6264	2.6472	2.64368	2.47254	2.5669	2.53146	2.43575
metab_2135	1.29557	0.709001	1.10363	1.16557	1.57848	1.35221	1.59322	2.11043
metab_2137	3.09849	2.85213	3.11901	2.93051	3.32513	3.25084	3.38462	3.58225
metab_2138	2.17204	2.12816	2.21454	2.28691	2.74112	2.74424	2.70793	2.69253
metab_2139	3.4156	3.42792	3.37929	3.38202	3.17297	3.27328	3.17941	3.09471
metab_2140	4.2764	4.15618	4.25927	4.19437	4.20905	4.19187	4.25693	4.32153
metab_2141	2.82915	2.62607	2.78164	2.67973	2.78908	2.75326	2.87336	2.92822
[truncated: 12,381 more rows]
